# Supplementary material
Source: Research Square preprint supplement (doi:10.21203/rs.3.rs-9484968/v1)
Supplement: Supplementary file 2 [file e4c4b6a0c68d02dfb20beb79.xlsx]

## Sheet: ST1_Cargo_Database
Cargo_Type	Cargo_Name	Category	Source
Protein	CD9	MSC Exosome Cargo	ExoCarta/Vesiclepedia/Literature
Protein	CD63	MSC Exosome Cargo	ExoCarta/Vesiclepedia/Literature
Protein	CD81	MSC Exosome Cargo	ExoCarta/Vesiclepedia/Literature
Protein	TSG101	MSC Exosome Cargo	ExoCarta/Vesiclepedia/Literature
Protein	ALIX	MSC Exosome Cargo	ExoCarta/Vesiclepedia/Literature
Protein	SDCBP	MSC Exosome Cargo	ExoCarta/Vesiclepedia/Literature
Protein	PDCD6IP	MSC Exosome Cargo	ExoCarta/Vesiclepedia/Literature
Protein	ITGA5	MSC Exosome Cargo	ExoCarta/Vesiclepedia/Literature
Protein	ITGB1	MSC Exosome Cargo	ExoCarta/Vesiclepedia/Literature
Protein	ITGAV	MSC Exosome Cargo	ExoCarta/Vesiclepedia/Literature
Protein	ITGB3	MSC Exosome Cargo	ExoCarta/Vesiclepedia/Literature
Protein	TGFB1	MSC Exosome Cargo	ExoCarta/Vesiclepedia/Literature
Protein	TGFB3	MSC Exosome Cargo	ExoCarta/Vesiclepedia/Literature
Protein	FGF2	MSC Exosome Cargo	ExoCarta/Vesiclepedia/Literature
Protein	HGF	MSC Exosome Cargo	ExoCarta/Vesiclepedia/Literature
Protein	IGF1	MSC Exosome Cargo	ExoCarta/Vesiclepedia/Literature
Protein	VEGFA	MSC Exosome Cargo	ExoCarta/Vesiclepedia/Literature
Protein	PDGFB	MSC Exosome Cargo	ExoCarta/Vesiclepedia/Literature
Protein	BMP2	MSC Exosome Cargo	ExoCarta/Vesiclepedia/Literature
Protein	IL10	MSC Exosome Cargo	ExoCarta/Vesiclepedia/Literature
Protein	IL1RN	MSC Exosome Cargo	ExoCarta/Vesiclepedia/Literature
Protein	CCL2	MSC Exosome Cargo	ExoCarta/Vesiclepedia/Literature
Protein	CXCL12	MSC Exosome Cargo	ExoCarta/Vesiclepedia/Literature
Protein	TSG6	MSC Exosome Cargo	ExoCarta/Vesiclepedia/Literature
Protein	MMP2	MSC Exosome Cargo	ExoCarta/Vesiclepedia/Literature
Protein	TIMP1	MSC Exosome Cargo	ExoCarta/Vesiclepedia/Literature
Protein	TIMP2	MSC Exosome Cargo	ExoCarta/Vesiclepedia/Literature
Protein	FN1	MSC Exosome Cargo	ExoCarta/Vesiclepedia/Literature
Protein	COL1A1	MSC Exosome Cargo	ExoCarta/Vesiclepedia/Literature
Protein	WNT3A	MSC Exosome Cargo	ExoCarta/Vesiclepedia/Literature
Protein	WNT5A	MSC Exosome Cargo	ExoCarta/Vesiclepedia/Literature
Protein	SHH	MSC Exosome Cargo	ExoCarta/Vesiclepedia/Literature
Protein	DKK1	MSC Exosome Cargo	ExoCarta/Vesiclepedia/Literature
Protein	IDO1	MSC Exosome Cargo	ExoCarta/Vesiclepedia/Literature
Protein	HLA_G	MSC Exosome Cargo	ExoCarta/Vesiclepedia/Literature
Protein	PD_L1	MSC Exosome Cargo	ExoCarta/Vesiclepedia/Literature
Protein	GALECTIN1	MSC Exosome Cargo	ExoCarta/Vesiclepedia/Literature
Protein	SOD1	MSC Exosome Cargo	ExoCarta/Vesiclepedia/Literature
Protein	SOD2	MSC Exosome Cargo	ExoCarta/Vesiclepedia/Literature
Protein	CAT	MSC Exosome Cargo	ExoCarta/Vesiclepedia/Literature
Protein	GPX1	MSC Exosome Cargo	ExoCarta/Vesiclepedia/Literature
Protein	HSPA8	MSC Exosome Cargo	ExoCarta/Vesiclepedia/Literature
Protein	HSP90AA1	MSC Exosome Cargo	ExoCarta/Vesiclepedia/Literature
Protein	HSPA1A	MSC Exosome Cargo	ExoCarta/Vesiclepedia/Literature
Protein	HSPB1	MSC Exosome Cargo	ExoCarta/Vesiclepedia/Literature
Protein	ACTB	MSC Exosome Cargo	ExoCarta/Vesiclepedia/Literature
Protein	TUBA1A	MSC Exosome Cargo	ExoCarta/Vesiclepedia/Literature
Protein	MSN	MSC Exosome Cargo	ExoCarta/Vesiclepedia/Literature
Protein	EZR	MSC Exosome Cargo	ExoCarta/Vesiclepedia/Literature
Protein	ANXA1	MSC Exosome Cargo	ExoCarta/Vesiclepedia/Literature
Protein	ANXA2	MSC Exosome Cargo	ExoCarta/Vesiclepedia/Literature
Protein	ANXA5	MSC Exosome Cargo	ExoCarta/Vesiclepedia/Literature
Protein	PKM	MSC Exosome Cargo	ExoCarta/Vesiclepedia/Literature
Protein	LDHA	MSC Exosome Cargo	ExoCarta/Vesiclepedia/Literature
Protein	ENO1	MSC Exosome Cargo	ExoCarta/Vesiclepedia/Literature
Protein	GAPDH	MSC Exosome Cargo	ExoCarta/Vesiclepedia/Literature
miRNA	hsa-miR-146a-5p	MSC Exosome Cargo	ExoCarta/Vesiclepedia/Literature
miRNA	hsa-miR-146b-5p	MSC Exosome Cargo	ExoCarta/Vesiclepedia/Literature
miRNA	hsa-miR-21-5p	MSC Exosome Cargo	ExoCarta/Vesiclepedia/Literature
miRNA	hsa-miR-124-3p	MSC Exosome Cargo	ExoCarta/Vesiclepedia/Literature
miRNA	hsa-miR-223-3p	MSC Exosome Cargo	ExoCarta/Vesiclepedia/Literature
miRNA	hsa-miR-140-5p	MSC Exosome Cargo	ExoCarta/Vesiclepedia/Literature
miRNA	hsa-miR-140-3p	MSC Exosome Cargo	ExoCarta/Vesiclepedia/Literature
miRNA	hsa-miR-127-5p	MSC Exosome Cargo	ExoCarta/Vesiclepedia/Literature
miRNA	hsa-miR-320a	MSC Exosome Cargo	ExoCarta/Vesiclepedia/Literature
miRNA	hsa-miR-320c	MSC Exosome Cargo	ExoCarta/Vesiclepedia/Literature
miRNA	hsa-miR-100-5p	MSC Exosome Cargo	ExoCarta/Vesiclepedia/Literature
miRNA	hsa-miR-199a-3p	MSC Exosome Cargo	ExoCarta/Vesiclepedia/Literature
miRNA	hsa-miR-26a-5p	MSC Exosome Cargo	ExoCarta/Vesiclepedia/Literature
miRNA	hsa-miR-29a-3p	MSC Exosome Cargo	ExoCarta/Vesiclepedia/Literature
miRNA	hsa-miR-29b-3p	MSC Exosome Cargo	ExoCarta/Vesiclepedia/Literature
miRNA	hsa-miR-29c-3p	MSC Exosome Cargo	ExoCarta/Vesiclepedia/Literature
miRNA	hsa-miR-155-5p	MSC Exosome Cargo	ExoCarta/Vesiclepedia/Literature
miRNA	hsa-miR-181a-5p	MSC Exosome Cargo	ExoCarta/Vesiclepedia/Literature
miRNA	hsa-miR-182-5p	MSC Exosome Cargo	ExoCarta/Vesiclepedia/Literature
miRNA	hsa-miR-92a-3p	MSC Exosome Cargo	ExoCarta/Vesiclepedia/Literature
miRNA	hsa-miR-23b-3p	MSC Exosome Cargo	ExoCarta/Vesiclepedia/Literature
miRNA	hsa-miR-135b-5p	MSC Exosome Cargo	ExoCarta/Vesiclepedia/Literature
miRNA	hsa-miR-let-7a-5p	MSC Exosome Cargo	ExoCarta/Vesiclepedia/Literature
miRNA	hsa-miR-let-7b-5p	MSC Exosome Cargo	ExoCarta/Vesiclepedia/Literature
miRNA	hsa-miR-125b-5p	MSC Exosome Cargo	ExoCarta/Vesiclepedia/Literature
miRNA	hsa-miR-130a-3p	MSC Exosome Cargo	ExoCarta/Vesiclepedia/Literature
miRNA	hsa-miR-210-3p	MSC Exosome Cargo	ExoCarta/Vesiclepedia/Literature
miRNA	hsa-miR-22-3p	MSC Exosome Cargo	ExoCarta/Vesiclepedia/Literature
miRNA	hsa-miR-27a-3p	MSC Exosome Cargo	ExoCarta/Vesiclepedia/Literature
miRNA	hsa-miR-27b-3p	MSC Exosome Cargo	ExoCarta/Vesiclepedia/Literature

## Sheet: ST1b_miRNA_Targets
miRNA	Target	n_databases	databases
hsa-miR-146a-5p	TRAF6	3	Literature_validated
hsa-miR-146b-5p	TRAF6	3	Literature_validated
hsa-miR-21-5p	PDCD4	3	Literature_validated
hsa-miR-124-3p	NF-kB	3	Literature_validated
hsa-miR-223-3p	NLRP3	3	Literature_validated
hsa-miR-140-5p	ADAMTS5	3	Literature_validated
hsa-miR-140-3p	ADAMTS5	3	Literature_validated
hsa-miR-127-5p	MMP13	3	Literature_validated
hsa-miR-320a	MMP13	3	Literature_validated
hsa-miR-320c	ADAMTS4	3	Literature_validated
hsa-miR-100-5p	mTOR	3	Literature_validated
hsa-miR-199a-3p	COX2	3	Literature_validated
hsa-miR-26a-5p	NF-kB	3	Literature_validated
hsa-miR-29a-3p	COL1A1	3	Literature_validated
hsa-miR-29b-3p	COL1A1	3	Literature_validated
hsa-miR-29c-3p	COL1A1	3	Literature_validated
hsa-miR-155-5p	SOCS1	3	Literature_validated
hsa-miR-181a-5p	TLR4	3	Literature_validated
hsa-miR-182-5p	FOXO1	3	Literature_validated
hsa-miR-92a-3p	DKK3	3	Literature_validated
hsa-miR-23b-3p	PTEN	3	Literature_validated
hsa-miR-135b-5p	SMAD5	3	Literature_validated
hsa-miR-let-7a-5p	HMGA2	3	Literature_validated
hsa-miR-let-7b-5p	HMGA2	3	Literature_validated
hsa-miR-125b-5p	TNF-alpha	3	Literature_validated
hsa-miR-130a-3p	SMAD2	3	Literature_validated
hsa-miR-210-3p	HIF1A	3	Literature_validated
hsa-miR-22-3p	BMP7	3	Literature_validated
hsa-miR-27a-3p	RUNX2	3	Literature_validated
hsa-miR-27b-3p	PPARG	3	Literature_validated

## Sheet: ST2_Cluster_Markers
p_val	avg_log2FC	pct.1	pct.2	p_val_adj	cluster	gene
0	0.698472	1	0.922	0	0	BGN
5.54864e-231	0.506436	0.999	0.977	1.40863e-226	0	ZFP36L1
6.42149e-230	0.50244	0.998	0.948	1.63022e-225	0	COL6A3
2.73337e-220	0.99338	0.954	0.688	6.9392e-216	0	FBLN1
3.30965e-217	0.743591	0.978	0.816	8.4022e-213	0	SNHG5
2.50569e-179	0.711921	0.96	0.822	6.3612e-175	0	FMOD
1.31365e-171	0.757008	0.956	0.763	3.33496e-167	0	PCOLCE
3.95306e-170	1.27352	0.802	0.481	1.00356e-165	0	NR4A3
3.44143e-167	0.580053	0.997	0.908	8.73677e-163	0	HILPDA
4.49837e-164	0.519658	0.99	0.911	1.142e-159	0	COL5A2
8.57048e-160	0.550079	0.982	0.914	2.17579e-155	0	RND3
3.56217e-159	0.614634	0.969	0.852	9.04328e-155	0	LRP1
1.17999e-157	0.581582	0.98	0.86	2.99565e-153	0	IFITM1
3.43348e-150	0.838269	0.924	0.758	8.71658e-146	0	MGP
1.71534e-145	1.05044	0.842	0.612	4.35474e-141	0	PGM2L1
4.37275e-141	1.23082	0.743	0.434	1.11011e-136	0	EGLN3
3.94383e-136	0.840593	0.874	0.699	1.00122e-131	0	PTGFR
1.71428e-135	0.865551	0.866	0.646	4.35203e-131	0	MXRA8
3.51427e-129	0.627403	0.95	0.82	8.92168e-125	0	SLC2A1
5.34683e-126	0.538374	0.97	0.863	1.3574e-121	0	COL5A1
2.88392e-125	0.994571	0.799	0.565	7.32141e-121	0	RIN2
3.70821e-119	0.863494	0.868	0.63	9.41402e-115	0	C10orf10
7.88515e-119	0.586111	0.949	0.849	2.0018e-114	0	MEDAG
1.83097e-118	0.802543	0.923	0.728	4.64827e-114	0	IGFBP5
2.82095e-117	0.779481	0.864	0.684	7.16154e-113	0	AEBP1
9.56301e-117	0.6367	0.966	0.872	2.42776e-112	0	G0S2
2.23628e-113	0.628427	0.926	0.785	5.67725e-109	0	PDGFRA
8.52942e-110	0.611374	0.924	0.79	2.16536e-105	0	SLC7A5
7.20536e-108	0.920831	0.782	0.586	1.82922e-103	0	SLC15A4
1.10226e-105	1.32254	0.63	0.365	2.79832e-101	0	METTL7A
1.42309e-105	0.598602	0.94	0.825	3.61279e-101	0	TNFAIP2
2.84194e-103	0.872099	0.862	0.663	7.21483e-99	0	PRG4
6.93263e-102	0.883753	0.806	0.604	1.75999e-97	0	REV3L
1.25257e-101	1.15018	0.658	0.366	3.17989e-97	0	COL14A1
4.38032e-98	1.52483	0.493	0.22	1.11203e-93	0	HTR2A
1.10135e-94	1.0483	0.674	0.43	2.796e-90	0	IL32
2.33903e-90	0.608632	0.885	0.738	5.9381e-86	0	IFI44L
1.33701e-89	0.590409	0.899	0.761	3.39426e-85	0	ADD3
8.85833e-89	1.40423	0.559	0.314	2.24886e-84	0	NTRK2
2.97564e-88	0.659378	0.851	0.714	7.55426e-84	0	IFNGR2
4.98272e-87	0.769412	0.798	0.615	1.26496e-82	0	LHFPL2
8.79909e-87	0.524778	0.943	0.82	2.23383e-82	0	TNFAIP3
3.87338e-85	0.776272	0.809	0.629	9.83335e-81	0	SOD3
6.44031e-85	1.31213	0.533	0.28	1.635e-80	0	DDIT4L
9.91446e-85	0.551632	0.902	0.774	2.51698e-80	0	SERPING1
4.606e-84	0.764422	0.792	0.657	1.16933e-79	0	EIF1B
6.39046e-81	0.51633	0.88	0.8	1.62235e-76	0	CD276
5.76891e-80	0.921941	0.696	0.483	1.46455e-75	0	GBP2
6.85189e-80	0.690027	0.813	0.649	1.73949e-75	0	SCARA3
1.76038e-79	0.59148	0.888	0.7	4.46908e-75	0	COL4A2
1.04509e-78	1.28005	0.539	0.299	2.65316e-74	0	PCSK1
2.29307e-76	0.708118	0.794	0.647	5.82143e-72	0	NINJ1
1.77867e-75	0.564104	0.873	0.739	4.51552e-71	0	MXI1
1.11704e-74	0.72119	0.805	0.606	2.83583e-70	0	CP
1.93143e-73	0.623834	0.848	0.71	4.90331e-69	0	ARID5B
2.54352e-73	1.24906	0.522	0.305	6.45722e-69	0	P4HA3
3.191e-72	0.723069	0.81	0.637	8.101e-68	0	CEMIP
4.85223e-72	0.562833	0.858	0.724	1.23184e-67	0	ANKH
2.33401e-71	0.752592	0.77	0.543	5.92536e-67	0	KCNE4
3.19484e-71	0.791562	0.718	0.53	8.11075e-67	0	EPB41L4A-AS1
9.07357e-71	1.18431	0.571	0.346	2.30351e-66	0	AL355607.2
9.56987e-70	0.561372	0.842	0.72	2.4295e-65	0	OPTN
1.01101e-69	0.759429	0.743	0.573	2.56665e-65	0	CLEC11A
8.6487e-69	0.500659	0.874	0.762	2.19565e-64	0	GAS5
1.71702e-68	1.04529	0.604	0.392	4.35901e-64	0	TWIST1
4.45515e-68	0.928347	0.662	0.468	1.13103e-63	0	SPON1
1.05257e-67	0.592656	0.856	0.715	2.67215e-63	0	VCAN
5.84909e-66	0.945774	0.638	0.432	1.48491e-61	0	GEM
7.6262e-66	0.95617	0.661	0.466	1.93606e-61	0	CRISPLD2
2.97635e-65	0.782822	0.723	0.583	7.55606e-61	0	VSTM4
1.77287e-64	0.850682	0.667	0.486	4.50079e-60	0	GPNMB
1.44151e-59	0.941556	0.592	0.374	3.65955e-55	0	FILIP1L
3.37629e-59	0.67906	0.75	0.581	8.57139e-55	0	SYNPO
7.97619e-59	0.877291	0.642	0.46	2.02491e-54	0	RBM43
1.26862e-57	0.620377	0.786	0.65	3.22065e-53	0	LTBP2
1.8594e-57	0.558424	0.81	0.677	4.72045e-53	0	MRC2
2.082e-57	1.34538	0.408	0.215	5.28556e-53	0	ITGA10
3.68016e-57	0.820451	0.677	0.514	9.34283e-53	0	MEG3
6.39177e-56	0.685049	0.715	0.574	1.62268e-51	0	LAMB2
3.24299e-55	0.764841	0.69	0.563	8.23297e-51	0	NRN1
3.26907e-55	0.585998	0.82	0.704	8.29919e-51	0	COMP
5.26835e-55	0.654448	0.77	0.605	1.33748e-50	0	VCAM1
8.57188e-55	0.573145	0.769	0.553	2.17614e-50	0	COL4A1
2.75501e-54	1.13453	0.506	0.322	6.99416e-50	0	AMPD3
4.88622e-54	0.56963	0.807	0.621	1.24047e-49	0	CYGB
3.28925e-53	0.648792	0.755	0.632	8.35042e-49	0	ANGPTL2
1.33907e-52	1.34849	0.363	0.175	3.3995e-48	0	SCG2
1.09876e-51	0.685255	0.716	0.595	2.78941e-47	0	ACSL3
2.82767e-51	1.53689	0.312	0.14	7.17861e-47	0	PCK1
4.70756e-51	1.53734	0.294	0.128	1.19511e-46	0	TNFRSF9
6.79057e-51	1.18829	0.439	0.255	1.72392e-46	0	TGFB3
7.84455e-51	0.77345	0.612	0.411	1.99149e-46	0	FBLN2
1.37855e-50	0.963276	0.566	0.394	3.49973e-46	0	NGLY1
1.22305e-49	1.00735	0.494	0.304	3.10495e-45	0	PRUNE2
2.61407e-48	0.652681	0.704	0.568	6.63635e-44	0	EPSTI1
3.7372e-48	0.854464	0.581	0.417	9.48764e-44	0	SH3PXD2B
1.79173e-47	0.62064	0.72	0.571	4.54868e-43	0	EDIL3
3.2768e-47	0.56562	0.753	0.627	8.31881e-43	0	IFIH1
7.57334e-47	1.48279	0.279	0.122	1.92264e-42	0	TNFRSF21
7.89438e-46	0.535573	0.814	0.707	2.00415e-41	0	ARL4C
1.75242e-45	0.630486	0.698	0.547	4.44888e-41	0	PDGFRB
6.99793e-45	0.863895	0.545	0.367	1.77656e-40	0	GGT5
1.26917e-44	0.827139	0.548	0.358	3.22203e-40	0	COL5A3
3.11678e-44	0.846192	0.572	0.423	7.91258e-40	0	DYM
3.66425e-44	0.771319	0.585	0.417	9.30243e-40	0	NREP
1.4461e-43	1.15321	0.403	0.234	3.67122e-39	0	ITPR1
5.7514e-43	0.777388	0.614	0.453	1.46011e-38	0	SLC39A8
1.00377e-42	1.3556	0.306	0.15	2.54827e-38	0	GPM6B
2.88392e-42	0.633665	0.678	0.536	7.32141e-38	0	NFATC4
5.93729e-42	0.818987	0.561	0.408	1.5073e-37	0	SYNGAP1
3.48695e-41	1.0403	0.433	0.271	8.85231e-37	0	TGFB1
4.45255e-41	0.669197	0.65	0.495	1.13037e-36	0	RETREG1
5.20687e-41	1.20288	0.337	0.176	1.32187e-36	0	FILIP1
5.89798e-41	0.557701	0.727	0.612	1.49732e-36	0	INSIG2
1.19054e-40	0.893413	0.566	0.427	3.02241e-36	0	DDX10
1.27591e-40	0.79626	0.556	0.389	3.23916e-36	0	ITGA11
7.62248e-40	0.519074	0.755	0.62	1.93512e-35	0	PCOLCE2
1.43943e-39	0.908342	0.491	0.336	3.65427e-35	0	FXYD6
8.20717e-39	0.674355	0.61	0.482	2.08356e-34	0	AL358472.1
9.9733e-39	0.952114	0.44	0.277	2.53192e-34	0	PER1
1.88699e-38	0.500509	0.767	0.646	4.79051e-34	0	ECM1
6.36592e-38	0.545772	0.709	0.582	1.61612e-33	0	FAM13A
9.70381e-38	1.14001	0.379	0.227	2.46351e-33	0	MLLT3
1.00597e-37	1.00049	0.442	0.287	2.55386e-33	0	LINC01128
1.28817e-37	0.728735	0.623	0.484	3.27027e-33	0	MXRA5
2.12229e-37	0.686913	0.56	0.371	5.38786e-33	0	SFRP4
3.32977e-37	0.592968	0.672	0.541	8.45328e-33	0	NFKB1
3.52671e-37	0.733911	0.574	0.428	8.95326e-33	0	COL27A1
1.32925e-36	0.620896	0.643	0.524	3.37457e-32	0	HEXA
1.01769e-35	0.669293	0.618	0.493	2.5836e-31	0	CDH11
1.64637e-35	0.701707	0.587	0.453	4.17963e-31	0	FAM110B
2.33749e-35	0.679142	0.593	0.459	5.9342e-31	0	PHF21A
6.45945e-35	0.689767	0.6	0.473	1.63986e-30	0	CYLD
5.41506e-34	0.710492	0.593	0.454	1.37472e-29	0	F3
8.27354e-34	0.796017	0.548	0.414	2.1004e-29	0	NR4A2
8.90591e-34	1.05131	0.384	0.239	2.26094e-29	0	CA9
1.43462e-33	0.581986	0.689	0.584	3.64206e-29	0	SCD
2.29405e-33	0.642808	0.61	0.484	5.82391e-29	0	SLC6A6
3.75692e-33	1.09446	0.328	0.185	9.5377e-29	0	SLC41A2
4.00286e-33	0.583107	0.66	0.565	1.01621e-28	0	CHD3
6.17733e-33	0.741722	0.539	0.406	1.56824e-28	0	SHB
6.25635e-33	0.53442	0.675	0.583	1.5883e-28	0	ATP6V1A
9.6368e-33	0.591436	0.661	0.541	2.4465e-28	0	BCL6
1.00546e-32	1.22562	0.308	0.171	2.55255e-28	0	PTGIS
1.05349e-32	0.903083	0.436	0.292	2.6745e-28	0	SULF2
9.96969e-32	1.1209	0.329	0.189	2.53101e-27	0	HPD
2.78233e-31	0.590119	0.641	0.523	7.06351e-27	0	CCNG2
6.06375e-31	0.592278	0.635	0.519	1.5394e-26	0	RORA
7.02505e-31	0.766262	0.503	0.378	1.78345e-26	0	LINC01578
8.57833e-31	1.34835	0.268	0.144	2.17778e-26	0	ANK2
9.42113e-31	1.21582	0.324	0.192	2.39174e-26	0	ENPP2
1.36318e-30	0.773371	0.503	0.377	3.4607e-26	0	CTSF
1.55366e-30	0.682217	0.53	0.397	3.94427e-26	0	SQSTM1
4.73193e-30	0.618469	0.598	0.492	1.20129e-25	0	CHD2
1.03662e-29	1.08873	0.353	0.223	2.63166e-25	0	SGCD
1.06224e-29	0.579085	0.658	0.573	2.6967e-25	0	PTPN1
5.22733e-28	0.673955	0.629	0.535	1.32706e-23	0	ADAMTS5
5.26068e-28	0.97634	0.371	0.242	1.33553e-23	0	DLG4
6.56709e-28	0.959363	0.389	0.261	1.66719e-23	0	SERPINF1
8.46484e-28	0.746081	0.505	0.385	2.14897e-23	0	ENPP1
8.83558e-28	0.760436	0.469	0.344	2.24309e-23	0	SIK2
1.76624e-27	0.618726	0.582	0.484	4.48396e-23	0	KIFAP3
8.4754e-27	0.828781	0.42	0.292	2.15165e-22	0	SGCA
8.96294e-27	0.936092	0.404	0.277	2.27542e-22	0	CDO1
1.72695e-26	0.619929	0.559	0.438	4.3842e-22	0	PLXDC2
1.90499e-26	1.0091	0.34	0.219	4.8362e-22	0	HACD4
1.92027e-26	0.958725	0.356	0.228	4.87498e-22	0	MN1
2.37265e-26	0.956201	0.365	0.241	6.02346e-22	0	RBMS3
2.41347e-26	1.09886	0.302	0.183	6.12707e-22	0	RERG
2.91016e-26	0.662465	0.538	0.431	7.38803e-22	0	H6PD
3.107e-26	0.979654	0.353	0.23	7.88773e-22	0	CPXM2
5.28139e-26	0.813572	0.443	0.314	1.34079e-21	0	MAF
5.41738e-26	0.579496	0.595	0.485	1.37531e-21	0	EBF1
1.00724e-25	0.994717	0.324	0.201	2.55708e-21	0	FNDC1
1.12604e-25	0.539413	0.633	0.548	2.85867e-21	0	NMI
2.13565e-25	1.00816	0.318	0.198	5.42178e-21	0	PPP1R3B
2.3179e-25	0.579919	0.581	0.478	5.88445e-21	0	CLK1
2.87061e-25	0.578842	0.605	0.499	7.28762e-21	0	BHLHE41
3.17424e-25	1.11939	0.263	0.148	8.05844e-21	0	BARX2
3.91208e-25	0.860745	0.41	0.287	9.9316e-21	0	KANK1
9.12853e-25	0.580847	0.559	0.458	2.31746e-20	0	CTSK
1.40332e-24	0.76235	0.458	0.341	3.56262e-20	0	ZNF385D
2.99277e-24	1.08997	0.28	0.167	7.59774e-20	0	GBP1P1
3.36946e-24	0.553452	0.598	0.499	8.55404e-20	0	CSF1
4.41365e-24	0.899553	0.334	0.21	1.12049e-19	0	SPON2
9.78124e-24	0.980924	0.304	0.186	2.48316e-19	0	IGF1
1.52483e-23	0.537822	0.627	0.54	3.87109e-19	0	LDLR
1.57937e-23	0.715485	0.445	0.328	4.00955e-19	0	AC023157.1
2.61543e-23	0.590545	0.541	0.422	6.63979e-19	0	HSD11B1
3.61042e-23	0.649987	0.496	0.388	9.16577e-19	0	MCC
5.52159e-23	0.79418	0.421	0.298	1.40177e-18	0	PAG1
1.10263e-22	0.556498	0.582	0.497	2.79924e-18	0	RERE
1.10966e-22	0.57059	0.552	0.451	2.8171e-18	0	SLC25A28
1.26313e-22	0.572563	0.557	0.441	3.20672e-18	0	LAMB3
1.22465e-21	0.558807	0.541	0.431	3.10901e-17	0	RNF144B
1.49418e-21	0.756594	0.41	0.294	3.79328e-17	0	ICAM1
1.66037e-21	0.928648	0.325	0.217	4.21517e-17	0	FAP
2.13155e-21	0.591183	0.526	0.422	5.41136e-17	0	ZBTB20
2.21422e-21	0.686098	0.452	0.348	5.62124e-17	0	BDH2
2.8513e-21	0.789211	0.393	0.284	7.23859e-17	0	LACC1
4.13967e-21	0.93092	0.321	0.213	1.05094e-16	0	C1QTNF6
6.61786e-21	0.745559	0.433	0.341	1.68008e-16	0	LRRC75A-AS1
1.31334e-20	0.623055	0.523	0.43	3.33417e-16	0	C14orf132
1.47451e-20	0.736579	0.38	0.261	3.74334e-16	0	HAPLN1
1.69678e-20	0.526913	0.592	0.532	4.30761e-16	0	DPP7
3.19278e-20	0.987687	0.296	0.194	8.10551e-16	0	PLEKHH2
4.0448e-20	0.599919	0.497	0.396	1.02685e-15	0	DNAJB2
4.85879e-20	0.642652	0.475	0.383	1.2335e-15	0	AL136968.2
6.24315e-20	0.785104	0.372	0.265	1.58495e-15	0	TCF7L1
1.14456e-19	0.842343	0.336	0.23	2.90571e-15	0	MTHFR
1.44439e-19	0.726003	0.431	0.325	3.66688e-15	0	FBLN5
1.70021e-19	0.810322	0.346	0.237	4.31633e-15	0	STARD4
3.0743e-19	0.928502	0.28	0.175	7.80474e-15	0	CH25H
4.9001e-19	0.739663	0.419	0.324	1.24399e-14	0	RGS3
7.1921e-19	0.559307	0.505	0.411	1.82586e-14	0	MIR210HG
1.04505e-18	1.05623	0.254	0.154	2.65306e-14	0	LPL
1.2253e-18	0.587178	0.463	0.352	3.11066e-14	0	APLN
1.38985e-18	0.591827	0.505	0.417	3.52841e-14	0	AGPAT4
1.61186e-18	0.885518	0.307	0.208	4.09203e-14	0	MARCH3
4.1955e-18	0.616988	0.479	0.39	1.06511e-13	0	DIP2C
9.42298e-18	0.86122	0.326	0.232	2.39221e-13	0	LETMD1
2.02801e-17	0.813457	0.337	0.242	5.1485e-13	0	VWA5A
3.0212e-17	0.522773	0.516	0.441	7.66991e-13	0	RPL34P34
3.18002e-17	0.669153	0.427	0.337	8.07312e-13	0	ARL5B
4.35856e-17	0.612908	0.438	0.342	1.10651e-12	0	MSI2
5.04162e-17	0.9743	0.267	0.175	1.27992e-12	0	PART1
7.6856e-17	0.948915	0.273	0.182	1.95114e-12	0	CYP27A1
7.94238e-17	0.753052	0.348	0.252	2.01633e-12	0	FLCN
9.46358e-17	0.651165	0.436	0.343	2.40252e-12	0	PLTP
1.00294e-16	0.939012	0.263	0.17	2.54617e-12	0	GAP43
1.31496e-16	0.833252	0.292	0.197	3.33829e-12	0	DGKI
2.22057e-16	0.756514	0.336	0.241	5.63737e-12	0	ZNF331
2.44498e-16	0.658022	0.355	0.253	6.20706e-12	0	DDIT4
2.74412e-16	0.775895	0.359	0.268	6.96649e-12	0	DPT
7.06718e-16	0.520855	0.53	0.465	1.79414e-11	0	ABHD14B
8.33505e-16	0.509688	0.426	0.318	2.11602e-11	0	MAOB
1.11827e-15	0.570166	0.465	0.384	2.83896e-11	0	INF2
1.29539e-15	0.52235	0.556	0.468	3.28861e-11	0	PENK
1.93053e-15	0.54548	0.461	0.383	4.90104e-11	0	RPS15AP11
2.38214e-15	0.729302	0.34	0.248	6.04753e-11	0	PLEKHA5
2.73602e-15	0.810055	0.307	0.218	6.94593e-11	0	LIMCH1
3.61991e-15	0.809167	0.313	0.225	9.18986e-11	0	PDLIM3
6.2862e-15	0.885913	0.262	0.177	1.59588e-10	0	AC004656.1
7.37383e-15	0.602603	0.417	0.326	1.87199e-10	0	AC097534.2
1.18746e-14	0.686547	0.39	0.308	3.01461e-10	0	CLIP3
1.21775e-14	0.518147	0.48	0.406	3.09151e-10	0	COL4A3BP
1.33117e-14	0.641003	0.394	0.307	3.37945e-10	0	APOL3
1.3903e-14	0.862271	0.278	0.19	3.52956e-10	0	HIVEP1
1.65434e-14	0.741995	0.304	0.217	4.19989e-10	0	GOLGA8A
1.88183e-14	0.848729	0.291	0.206	4.7774e-10	0	STMN3
2.04322e-14	0.880798	0.301	0.217	5.18712e-10	0	LRRC15
3.00027e-14	0.788814	0.262	0.175	7.61679e-10	0	AQP1
3.65488e-14	0.869609	0.262	0.179	9.27864e-10	0	CBLN3
5.10127e-14	0.560567	0.445	0.356	1.29506e-09	0	WTAPP1
5.9549e-14	0.51754	0.469	0.39	1.51177e-09	0	RELB
7.8116e-14	0.517093	0.488	0.423	1.98313e-09	0	SNAPC3
9.13047e-14	0.745313	0.353	0.273	2.31795e-09	0	DGKD
1.53101e-13	0.540018	0.451	0.374	3.88678e-09	0	BCL9L
1.85663e-13	0.747075	0.274	0.191	4.71341e-09	0	ZBTB10
1.89847e-13	0.534879	0.295	0.199	4.81964e-09	0	IGFBP2
2.39292e-13	0.717399	0.328	0.243	6.07491e-09	0	FIBIN
2.62374e-13	0.58946	0.377	0.294	6.6609e-09	0	ORAI3
2.94233e-13	0.612655	0.396	0.321	7.46969e-09	0	C1RL
3.01299e-13	0.712523	0.322	0.24	7.64908e-09	0	NCK1
3.46255e-13	0.622794	0.376	0.291	8.79039e-09	0	RAB20
3.54369e-13	0.746676	0.344	0.261	8.99637e-09	0	ADAMTS4
4.66095e-13	0.766455	0.305	0.224	1.18327e-08	0	SLC7A8
4.8769e-13	0.542115	0.42	0.341	1.2381e-08	0	FAM219A
5.3028e-13	0.655097	0.353	0.273	1.34622e-08	0	SNED1
6.0249e-13	0.509178	0.466	0.398	1.52954e-08	0	GAA
7.97434e-13	0.627164	0.366	0.287	2.02444e-08	0	PFKFB4
8.42335e-13	0.536658	0.426	0.348	2.13844e-08	0	C3orf58
8.53445e-13	0.540036	0.439	0.365	2.16664e-08	0	MYO1D
1.1944e-12	0.827205	0.259	0.182	3.03223e-08	0	LNX1
1.26651e-12	0.669682	0.334	0.254	3.21528e-08	0	ABHD4
1.85723e-12	0.529871	0.442	0.369	4.71494e-08	0	ZNF385A
1.8828e-12	0.547453	0.433	0.364	4.77987e-08	0	SOCS2
2.20831e-12	0.55474	0.41	0.332	5.60624e-08	0	ALDH2
3.72104e-12	0.607971	0.36	0.284	9.44659e-08	0	VPS13C
4.97185e-12	0.760156	0.253	0.174	1.2622e-07	0	C2CD4A
5.23776e-12	0.596582	0.358	0.277	1.32971e-07	0	OLFML3
7.68514e-12	0.623847	0.378	0.307	1.95103e-07	0	SPECC1
7.71612e-12	0.64002	0.373	0.308	1.95889e-07	0	PTPRG
1.6213e-11	0.794148	0.252	0.179	4.116e-07	0	STARD10
1.64392e-11	0.747514	0.285	0.212	4.17343e-07	0	CRYBB2P1
1.6944e-11	0.63133	0.347	0.274	4.30157e-07	0	LINC00963
3.8895e-11	0.512275	0.389	0.315	9.87426e-07	0	CDKN1B
5.34253e-11	0.546627	0.4	0.335	1.35631e-06	0	SNHG7
5.70234e-11	0.671612	0.293	0.218	1.44765e-06	0	RASD1
1.58994e-10	0.769366	0.275	0.208	4.03638e-06	0	LSS
2.97425e-10	0.513162	0.361	0.289	7.55074e-06	0	ANKRD10
3.06355e-10	0.76919	0.253	0.185	7.77743e-06	0	CCDC18-AS1
3.28936e-10	0.508379	0.421	0.365	8.35069e-06	0	AC099336.2
3.5157e-10	0.70468	0.311	0.246	8.9253e-06	0	DYNC2H1
4.13277e-10	0.543351	0.404	0.344	1.04919e-05	0	SLC9B2
4.96651e-10	0.729433	0.291	0.218	1.26085e-05	0	RGS16
1.08048e-09	0.743134	0.276	0.212	2.74302e-05	0	GAS7
1.37377e-09	0.507148	0.389	0.325	3.48758e-05	0	JHDM1D-AS1
1.72174e-09	0.563384	0.371	0.312	4.37099e-05	0	SCRN1
1.73552e-09	0.542244	0.381	0.319	4.40596e-05	0	SOX5
1.90169e-09	0.598761	0.277	0.207	4.82782e-05	0	COL18A1
2.60723e-09	0.554922	0.372	0.315	6.61897e-05	0	HELZ
3.78517e-09	0.593482	0.317	0.253	9.6094e-05	0	SNHG19
5.20094e-09	0.575427	0.315	0.249	0.000132036	0	CA5B
6.27075e-09	0.530408	0.407	0.357	0.000159196	0	TIPARP
8.18138e-09	0.515726	0.365	0.305	0.000207701	0	NOP53
1.05711e-08	0.533597	0.367	0.309	0.000268369	0	OGFRL1
1.34174e-08	0.689156	0.258	0.2	0.000340627	0	RMND1
1.65923e-08	0.633744	0.291	0.228	0.000421228	0	NPHP3
1.88095e-08	0.544405	0.294	0.231	0.000477516	0	NFKBIE
2.74771e-08	0.524991	0.363	0.303	0.000697561	0	MAP1LC3A
6.4806e-08	0.537581	0.353	0.305	0.00164523	0	NNT-AS1
6.67868e-08	0.513456	0.363	0.314	0.00169552	0	RPS15AP1
1.18189e-07	0.595941	0.288	0.234	0.00300047	0	ZHX2
1.53158e-07	0.643465	0.266	0.21	0.00388823	0	CPED1
1.60467e-07	0.541847	0.299	0.241	0.00407378	0	HAPLN3
2e-07	0.510254	0.365	0.319	0.00507739	0	ZFX
2.1394e-07	0.502075	0.305	0.245	0.0054313	0	OASL
2.22411e-07	0.542628	0.305	0.249	0.00564634	0	KLHL24
2.93045e-07	0.522944	0.3	0.246	0.00743955	0	PRKAB2
3.13395e-07	0.628102	0.264	0.211	0.00795616	0	H1FX
4.02244e-07	0.660717	0.254	0.202	0.0102118	0	HDAC4
4.78762e-07	0.597214	0.3	0.252	0.0121543	0	PDK3
6.69016e-07	0.585237	0.296	0.249	0.0169843	0	CALHM2
7.50751e-07	0.541123	0.283	0.231	0.0190593	0	DDX60
8.04869e-07	0.540995	0.31	0.259	0.0204332	0	PDK1
1.30755e-06	0.570863	0.285	0.235	0.0331949	0	ABHD17C
1.80043e-06	0.540177	0.308	0.263	0.0457075	0	FAM8A1
2.11104e-06	0.583523	0.296	0.252	0.0535929	0	SLC25A23
3.15476e-06	0.589395	0.264	0.217	0.0800898	0	IL15RA
3.80126e-06	0.60052	0.273	0.228	0.0965025	0	PTPRM
3.85262e-06	0.519185	0.31	0.265	0.0978064	0	SLC22A17
4.34458e-06	0.52544	0.31	0.266	0.110296	0	ANKZF1
4.53379e-06	0.619211	0.267	0.225	0.115099	0	SIRT2
4.71055e-06	0.526919	0.287	0.241	0.119587	0	ING4
7.60921e-06	0.507091	0.308	0.269	0.193175	0	CCNG1
9.22142e-06	0.581737	0.263	0.222	0.234104	0	FGD5
1.08497e-05	0.540796	0.278	0.235	0.275442	0	ARSA
3.43318e-05	0.51226	0.278	0.238	0.871582	0	PLEKHA2
3.80956e-05	0.534749	0.283	0.247	0.967134	0	DNM1
8.28037e-05	0.519733	0.279	0.246	1	0	AHSA2
8.93392e-05	0.529847	0.252	0.213	1	0	GSTM4
9.63471e-05	0.512037	0.261	0.226	1	0	LEPR
0.000240181	0.512072	0.291	0.265	1	0	ZNF280D
0.000473213	0.517899	0.259	0.23	1	0	ZNF226
1.48652e-177	0.648117	1	0.953	3.77383e-173	1	CHI3L1
9.45324e-163	1.0806	0.91	0.602	2.39989e-158	1	PCOLCE2
4.51701e-137	0.501989	0.998	0.945	1.14673e-132	1	LUM
7.40802e-132	0.84299	0.929	0.738	1.88067e-127	1	LOX
1.97965e-124	2.37516	0.388	0.103	5.02574e-120	1	SMOC2
1.39995e-121	1.40599	0.695	0.342	3.55404e-117	1	C2orf40
3.99317e-116	1.22885	0.785	0.484	1.01375e-111	1	GALNT15
7.26629e-107	1.15554	0.768	0.467	1.84469e-102	1	CDON
3.04643e-101	0.737183	0.936	0.786	7.73396e-97	1	CHI3L2
2.70257e-99	0.923344	0.872	0.605	6.861e-95	1	CP
3.60143e-97	0.73358	0.908	0.726	9.14295e-93	1	IGFBP6
4.83221e-97	1.27952	0.682	0.379	1.22675e-92	1	SCRG1
5.34864e-97	0.903521	0.832	0.574	1.35786e-92	1	ITM2C
1.25061e-89	1.03195	0.758	0.486	3.17492e-85	1	RETREG1
7.53602e-89	0.772778	0.909	0.773	1.91317e-84	1	HMOX1
9.78445e-89	1.53942	0.515	0.222	2.48398e-84	1	OGN
8.10561e-88	0.520543	0.963	0.854	2.05777e-83	1	QSOX1
1.04211e-83	0.821282	0.82	0.599	2.64561e-79	1	GOLM1
8.86902e-83	0.683141	0.901	0.724	2.25158e-78	1	ISLR
1.89816e-81	1.51206	0.501	0.221	4.81885e-77	1	FIBIN
2.53063e-80	1.26001	0.615	0.328	6.42452e-76	1	P3H2
1.44039e-79	0.659137	0.897	0.721	3.65672e-75	1	FOXC1
4.63362e-77	1.03086	0.693	0.422	1.17634e-72	1	CLIC6
3.10689e-73	0.932567	0.73	0.47	7.88745e-69	1	DKK3
5.11859e-71	1.22368	0.566	0.299	1.29946e-66	1	GBP3
2.74183e-70	0.545885	0.899	0.783	6.96067e-66	1	GALNT2
9.85813e-70	0.947115	0.721	0.454	2.50268e-65	1	CD109
1.8585e-69	0.75804	0.85	0.632	4.71818e-65	1	TNFRSF11B
4.52976e-69	0.641052	0.865	0.695	1.14997e-64	1	PCYOX1
2.21421e-68	1.6255	0.346	0.125	5.62122e-64	1	FGFBP2
2.68847e-68	1.51101	0.423	0.178	6.82522e-64	1	GDF6
3.24445e-68	0.50142	0.942	0.82	8.23668e-64	1	PDPN
2.47435e-67	0.555676	0.919	0.779	6.28164e-63	1	MFGE8
6.76275e-67	0.786375	0.788	0.554	1.71686e-62	1	NRN1
1.82588e-66	0.527432	0.91	0.785	4.63537e-62	1	C1QTNF1
1.46726e-64	1.09827	0.638	0.38	3.72492e-60	1	SERPINA1
4.49077e-64	0.90796	0.703	0.45	1.14007e-59	1	GMDS
4.44783e-63	0.586556	0.891	0.7	1.12917e-58	1	SRGN
3.34061e-62	1.25225	0.502	0.248	8.48081e-58	1	HAPLN1
3.6963e-62	0.689488	0.842	0.647	9.3838e-58	1	LTBP2
8.35028e-62	0.589427	0.889	0.746	2.11989e-57	1	PRELP
1.55022e-60	0.568221	0.889	0.726	3.93553e-56	1	ANKH
7.50626e-60	1.11212	0.554	0.304	1.90561e-55	1	PRUNE2
2.65626e-59	0.538018	0.9	0.742	6.74345e-55	1	FAM20C
2.9305e-57	0.961	0.637	0.399	7.43967e-53	1	MEF2A
3.74142e-56	0.817475	0.711	0.486	9.49834e-52	1	GPX3
6.77327e-56	0.724391	0.786	0.587	1.71953e-51	1	SEMA3C
1.4804e-55	0.705835	0.78	0.569	3.7583e-51	1	EDIL3
2.21723e-55	0.712884	0.784	0.624	5.62888e-51	1	SIX1
7.87987e-55	0.808182	0.702	0.476	2.00046e-50	1	ASS1
2.34986e-54	0.737939	0.802	0.646	5.96558e-50	1	CEMIP
8.92496e-52	0.592111	0.832	0.678	2.26578e-47	1	PSD3
7.83499e-51	1.18247	0.455	0.234	1.98907e-46	1	ITPR1
9.58765e-51	0.553951	0.902	0.709	2.43402e-46	1	FBLN1
3.07473e-50	0.628701	0.8	0.593	7.80582e-46	1	CAPG
4.64926e-47	0.606915	0.82	0.653	1.18031e-42	1	ACKR3
8.39769e-47	0.644363	0.85	0.705	2.13192e-42	1	COMP
1.27543e-46	0.874712	0.639	0.441	3.23793e-42	1	SOX9
1.8227e-46	1.82516	0.278	0.113	4.62729e-42	1	FGF1
4.35068e-46	0.66181	0.746	0.568	1.10451e-41	1	CYBRD1
4.62818e-46	0.549549	0.861	0.669	1.17496e-41	1	SMOC1
2.45802e-45	1.09794	0.467	0.259	6.24017e-41	1	SNED1
1.07048e-44	1.35353	0.334	0.15	2.71762e-40	1	PLXNA4
2.82077e-43	0.778137	0.639	0.431	7.16109e-39	1	PLXDC2
3.88704e-43	0.653736	0.732	0.551	9.86803e-39	1	FCGRT
8.68041e-43	0.589655	0.812	0.65	2.20369e-38	1	C10orf10
2.61804e-42	0.854682	0.62	0.415	6.64642e-38	1	FZD8
8.8846e-42	0.62256	0.778	0.629	2.25553e-37	1	FAM46A
1.38155e-40	1.06387	0.426	0.226	3.50735e-36	1	ANGPTL5
1.51221e-40	0.545408	0.816	0.656	3.83905e-36	1	SCARA3
8.87267e-40	0.682381	0.68	0.458	2.2525e-35	1	EGLN3
2.02989e-39	0.640515	0.714	0.536	5.15329e-35	1	PTGER2
9.76964e-39	0.784567	0.612	0.416	2.48022e-34	1	TMTC1
1.43971e-38	1.10064	0.439	0.247	3.65499e-34	1	SLPI
2.53317e-38	0.600777	0.769	0.586	6.43095e-34	1	SYNPO
3.08813e-38	0.899713	0.464	0.263	7.83984e-34	1	SKAP2
4.28353e-37	0.55726	0.776	0.627	1.08746e-32	1	LHFPL2
7.75869e-36	0.946034	0.446	0.258	1.9697e-31	1	GPC6
1.0187e-35	0.880106	0.522	0.326	2.58618e-31	1	NDP
9.55753e-35	1.0051	0.391	0.209	2.42637e-30	1	LIMCH1
8.77636e-34	1.16251	0.324	0.161	2.22805e-29	1	SBSN
1.13521e-33	0.851996	0.484	0.299	2.88195e-29	1	STEAP3
1.25747e-33	0.876258	0.499	0.312	3.19234e-29	1	MAOB
8.27298e-33	0.945309	0.415	0.236	2.10026e-28	1	CAMK1D
1.07483e-32	0.755538	0.541	0.353	2.72867e-28	1	MYO1D
2.04653e-32	0.589144	0.691	0.524	5.19553e-28	1	FGFRL1
7.01395e-32	0.701557	0.607	0.43	1.78063e-27	1	ABCA1
1.24032e-31	0.796739	0.537	0.365	3.1488e-27	1	PLK2
6.25523e-31	1.31438	0.251	0.114	1.58801e-26	1	TCEAL2
7.99515e-31	0.648371	0.672	0.512	2.02973e-26	1	RBP4
8.77327e-31	0.587469	0.746	0.62	2.22727e-26	1	AK3
9.78118e-31	0.708359	0.62	0.46	2.48315e-26	1	SLC39A8
1.69947e-30	0.645439	0.629	0.454	4.31445e-26	1	AL365357.1
2.88367e-29	0.615299	0.664	0.498	7.32076e-25	1	COL8A1
7.97773e-29	0.95518	0.336	0.179	2.02531e-24	1	ECM2
1.44154e-28	0.581474	0.683	0.524	3.65963e-24	1	DPYSL3
1.49667e-28	0.524041	0.763	0.648	3.7996e-24	1	BDKRB2
1.85354e-28	1.04268	0.33	0.178	4.70558e-24	1	ERAP2
4.14049e-28	0.717506	0.521	0.343	1.05115e-23	1	ACAN
5.08077e-28	0.715732	0.555	0.396	1.28985e-23	1	PLAC9
6.98097e-28	0.658956	0.628	0.47	1.77226e-23	1	RBM43
2.03309e-27	0.863361	0.385	0.222	5.16142e-23	1	ABHD17C
5.3026e-27	1.00844	0.288	0.146	1.34617e-22	1	PROS1
6.24981e-27	0.501166	0.734	0.591	1.58664e-22	1	C1GALT1
6.68008e-27	0.581887	0.65	0.495	1.69587e-22	1	VASN
8.73004e-27	0.907008	0.387	0.23	2.2163e-22	1	MN1
1.21829e-26	0.556563	0.661	0.498	3.09287e-22	1	GBP2
1.7145e-26	0.647982	0.673	0.548	4.35261e-22	1	SLC5A3
2.30723e-26	0.797063	0.467	0.302	5.85735e-22	1	DDIT4L
1.30468e-25	0.589584	0.669	0.533	3.31218e-21	1	ADAMTS5
2.38508e-25	0.705437	0.479	0.31	6.055e-21	1	CADM1
2.97204e-25	0.582524	0.638	0.48	7.54513e-21	1	SASH1
3.35472e-25	0.806029	0.395	0.238	8.51663e-21	1	BOC
1.11227e-24	1.21227	0.26	0.135	2.82371e-20	1	AL139220.2
2.60115e-24	0.634434	0.602	0.462	6.60353e-20	1	C11orf96
5.2249e-24	0.506276	0.721	0.604	1.32644e-19	1	MAFB
7.43152e-24	1.04951	0.268	0.14	1.88664e-19	1	CCL28
7.83772e-24	0.912838	0.324	0.185	1.98976e-19	1	SLC35E2B
1.00833e-23	0.92983	0.341	0.199	2.55985e-19	1	ZNF521
1.35438e-23	0.503836	0.667	0.523	3.43837e-19	1	TMEM98
1.93116e-23	0.644283	0.543	0.392	4.90263e-19	1	FKBP7
1.93673e-23	0.825321	0.436	0.289	4.91678e-19	1	KANK1
3.46716e-23	0.640269	0.559	0.407	8.80207e-19	1	HSD3B7
7.11866e-23	0.815365	0.386	0.239	1.80721e-18	1	MAN2B2
7.8471e-23	0.975727	0.311	0.178	1.99214e-18	1	LNX1
4.70676e-22	0.654003	0.488	0.334	1.19491e-17	1	PALMD
8.43292e-22	0.785495	0.354	0.214	2.14087e-17	1	XG
1.40579e-21	0.936136	0.368	0.234	3.56887e-17	1	PRDM1
1.43988e-21	0.894269	0.308	0.176	3.65542e-17	1	TCAF2
1.82241e-21	0.82553	0.357	0.22	4.62655e-17	1	SLC7A8
3.10651e-21	0.613664	0.575	0.44	7.88649e-17	1	HERC4
6.73516e-21	0.693748	0.45	0.303	1.70986e-16	1	APOL3
2.24532e-20	0.879239	0.312	0.184	5.70019e-16	1	TCEA3
5.14708e-20	0.717176	0.42	0.281	1.30669e-15	1	CDO1
5.79623e-20	0.620645	0.492	0.347	1.47149e-15	1	SIK2
1.18555e-19	0.8048	0.309	0.182	3.00975e-15	1	PDGFRL
1.22375e-19	0.691236	0.501	0.367	3.10674e-15	1	AL355607.2
2.09362e-19	0.52178	0.621	0.488	5.31508e-15	1	SLC6A6
2.10831e-19	0.88738	0.289	0.167	5.35236e-15	1	SLC26A11
2.61613e-19	0.695456	0.425	0.291	6.64157e-15	1	ORAI3
2.655e-19	0.844601	0.289	0.166	6.74025e-15	1	FNDC4
3.13244e-19	0.574362	0.567	0.435	7.95233e-15	1	NEGR1
5.30886e-19	0.586221	0.524	0.387	1.34776e-14	1	ENPP1
6.52568e-19	0.789403	0.354	0.225	1.65667e-14	1	RGL1
1.72087e-18	0.929778	0.278	0.163	4.36878e-14	1	MELTF
1.79391e-18	0.793461	0.371	0.243	4.55421e-14	1	CA5B
1.90858e-18	0.600224	0.483	0.342	4.84532e-14	1	GPRC5A
2.19714e-18	0.521265	0.554	0.408	5.57787e-14	1	MIR210HG
2.20526e-18	0.540476	0.615	0.492	5.59849e-14	1	MXRA5
2.75362e-18	0.509306	0.582	0.445	6.99063e-14	1	HEXB
4.80708e-18	0.797258	0.269	0.152	1.22037e-13	1	BARX2
1.16775e-17	0.873646	0.3	0.186	2.96456e-13	1	CRYZ
1.1942e-17	0.612132	0.462	0.335	3.03171e-13	1	SUMF1
1.29855e-17	0.843228	0.297	0.182	3.29663e-13	1	AGA
1.3921e-17	0.52978	0.548	0.416	3.53413e-13	1	PRCP
3.81237e-17	0.566733	0.499	0.365	9.67847e-13	1	TGFBR2
6.56327e-17	0.662569	0.419	0.292	1.66622e-12	1	ARHGAP29
1.41159e-16	0.568791	0.5	0.371	3.58359e-12	1	CTSA
2.61955e-16	0.538991	0.561	0.445	6.65026e-12	1	CFH
3.74439e-16	0.698204	0.357	0.235	9.50588e-12	1	PRKCA
3.89809e-16	0.580804	0.453	0.325	9.89608e-12	1	AC097534.2
4.04631e-16	0.528188	0.595	0.485	1.02724e-11	1	CRISPLD2
6.26882e-16	0.693672	0.339	0.221	1.59147e-11	1	GALNT18
6.44506e-16	1.02732	0.276	0.172	1.63621e-11	1	STS
8.19907e-16	0.555129	0.448	0.325	2.0815e-11	1	CCPG1
1.26022e-15	0.687885	0.368	0.249	3.19931e-11	1	JAK2
1.3034e-15	0.596809	0.349	0.225	3.30893e-11	1	LUCAT1
1.45721e-15	0.52953	0.487	0.362	3.69942e-11	1	SGCE
2.05763e-15	0.739907	0.354	0.24	5.22371e-11	1	TM7SF3
5.56663e-15	0.849678	0.27	0.167	1.4132e-10	1	HSPB7
5.93277e-15	0.757654	0.278	0.17	1.50615e-10	1	SLC16A4
7.56851e-15	0.59422	0.461	0.343	1.92142e-10	1	MSI2
7.72089e-15	0.677846	0.378	0.261	1.9601e-10	1	OLFM1
8.92821e-15	0.51128	0.535	0.427	2.2666e-10	1	ALDH3A2
1.23735e-14	0.700223	0.291	0.184	3.14125e-10	1	ANG
1.32684e-14	0.781901	0.289	0.183	3.36844e-10	1	WFDC21P
1.80069e-14	0.768194	0.277	0.172	4.57142e-10	1	GBP1P1
5.39011e-14	0.675795	0.334	0.226	1.36839e-09	1	HACD4
5.66533e-14	0.639772	0.402	0.293	1.43826e-09	1	ARL10
6.64415e-14	0.567948	0.418	0.303	1.68675e-09	1	CSPG4
6.94626e-14	0.537923	0.461	0.346	1.76345e-09	1	ZNF385D
7.61946e-14	0.554503	0.444	0.33	1.93435e-09	1	ALDH2
8.31618e-14	0.637224	0.401	0.292	2.11123e-09	1	SLC17A5
1.17956e-13	0.512816	0.466	0.346	2.99455e-09	1	C3orf58
1.19499e-13	0.535432	0.439	0.321	3.03371e-09	1	JHDM1D-AS1
1.78191e-13	0.682865	0.298	0.193	4.52373e-09	1	PTPRU
2.35747e-13	0.567757	0.385	0.27	5.98491e-09	1	GULP1
2.50929e-13	0.528012	0.598	0.505	6.37035e-09	1	ADAMTS1
2.67332e-13	0.560746	0.427	0.315	6.78676e-09	1	AIG1
3.40492e-13	0.506437	0.465	0.351	8.64407e-09	1	BDH2
4.09537e-13	0.584598	0.562	0.47	1.03969e-08	1	PTX3
5.26825e-13	0.62502	0.348	0.239	1.33745e-08	1	GPX7
6.06111e-13	0.579956	0.367	0.258	1.53873e-08	1	ALDH6A1
6.54661e-13	0.537343	0.487	0.381	1.66199e-08	1	C1GALT1C1
7.64242e-13	0.712707	0.271	0.174	1.94018e-08	1	HIST1H2BD
7.70074e-13	0.564873	0.376	0.268	1.95499e-08	1	GPR68
1.10538e-12	0.663813	0.337	0.235	2.80622e-08	1	MTHFR
1.33956e-12	0.531441	0.48	0.384	3.40075e-08	1	PTGFRN
1.75091e-12	0.665671	0.262	0.166	4.44503e-08	1	RHOU
1.80403e-12	0.620487	0.341	0.239	4.57989e-08	1	RPS6KA2
2.46845e-12	0.510101	0.466	0.361	6.26666e-08	1	NTPCR
3.28582e-12	0.676944	0.341	0.245	8.3417e-08	1	RIDA
3.72838e-12	0.580717	0.352	0.251	9.46524e-08	1	VPS13A
3.86798e-12	0.595051	0.335	0.232	9.81963e-08	1	SGCD
4.17479e-12	0.535082	0.405	0.296	1.05985e-07	1	PYGL
4.65422e-12	0.50297	0.464	0.361	1.18157e-07	1	ANXA4
5.22114e-12	0.573262	0.363	0.258	1.32549e-07	1	MET
5.83083e-12	0.631449	0.265	0.17	1.48027e-07	1	IQSEC2
6.94478e-12	0.516394	0.406	0.297	1.76307e-07	1	DHRS3
1.45801e-11	0.554086	0.404	0.3	3.70145e-07	1	SGCA
2.04214e-11	0.644806	0.262	0.17	5.18437e-07	1	SVIP
2.45078e-11	0.620481	0.367	0.271	6.2218e-07	1	MMP10
2.54983e-11	0.727407	0.257	0.168	6.47324e-07	1	PC
2.89455e-11	0.598788	0.331	0.235	7.34839e-07	1	IL17RC
3.0205e-11	0.529154	0.377	0.275	7.66813e-07	1	LRP11
3.64508e-11	0.54276	0.39	0.291	9.25377e-07	1	SLC35A5
6.72581e-11	0.659301	0.296	0.205	1.70748e-06	1	PLCD3
7.05043e-11	0.523346	0.374	0.276	1.78989e-06	1	CHCHD7
1.02932e-10	0.531405	0.374	0.278	2.61315e-06	1	SLC38A6
1.40304e-10	0.533357	0.322	0.224	3.56191e-06	1	FAM174A
1.46207e-10	0.639985	0.258	0.169	3.71176e-06	1	BEND6
2.77239e-10	0.536583	0.353	0.255	7.03826e-06	1	PDK1
3.0706e-10	0.529069	0.34	0.246	7.79533e-06	1	VWA5A
4.02919e-10	0.690753	0.251	0.17	1.02289e-05	1	SPAG4
7.10238e-10	0.563343	0.337	0.248	1.80308e-05	1	SLC25A23
1.31226e-09	0.58752	0.294	0.208	3.33142e-05	1	GSTM4
1.53456e-09	0.628931	0.377	0.292	3.89579e-05	1	ZFP36L2
1.86564e-09	0.594724	0.288	0.203	4.73629e-05	1	ENPP2
1.98857e-09	0.540237	0.283	0.196	5.04838e-05	1	IFT80
2.50186e-09	0.661798	0.278	0.196	6.35147e-05	1	HFE
2.90587e-09	0.588223	0.288	0.206	7.37713e-05	1	MAB21L2
3.54999e-09	0.595634	0.278	0.199	9.01237e-05	1	DHRS1
5.13403e-09	0.551508	0.294	0.213	0.000130338	1	SLC19A3
8.57997e-09	0.530541	0.293	0.211	0.00021782	1	LTBP3
1.04165e-08	0.581347	0.309	0.228	0.000264444	1	SIX2
1.16214e-08	0.569181	0.345	0.267	0.000295032	1	SLC30A1
1.29873e-08	0.51115	0.377	0.292	0.000329709	1	ATP1B1
1.5994e-08	0.537263	0.306	0.228	0.000406039	1	COPZ2
1.7921e-08	0.587061	0.258	0.182	0.000454961	1	AC004656.1
1.93363e-08	0.565869	0.25	0.175	0.00049089	1	LRIF1
2.14972e-08	0.528576	0.298	0.218	0.000545749	1	THYN1
2.28074e-08	0.589594	0.267	0.192	0.000579012	1	ABHD14A
2.2936e-08	0.508879	0.334	0.252	0.000582277	1	CYB5R1
4.33244e-08	0.580548	0.274	0.201	0.00109988	1	HDAC4
7.50892e-08	0.505416	0.307	0.228	0.00190629	1	WDR11
9.54859e-08	0.625037	0.258	0.19	0.0024241	1	HOXA5
1.00277e-07	0.581313	0.27	0.199	0.00254574	1	DYRK4
1.05035e-07	0.62782	0.252	0.18	0.00266652	1	NOVA1
1.37902e-07	0.563215	0.25	0.18	0.00350093	1	MR1
3.04941e-07	0.553792	0.263	0.193	0.00774155	1	C17orf58
4.57217e-07	0.559691	0.256	0.189	0.0116074	1	SCPEP1
8.19772e-07	0.5577	0.265	0.198	0.0208116	1	SMAD6
1.08249e-06	0.593303	0.298	0.232	0.0274812	1	PI3
1.15138e-06	0.594464	0.302	0.241	0.0292302	1	CABLES1
1.32525e-06	0.610637	0.287	0.222	0.0336441	1	RASD1
1.8824e-06	0.518728	0.284	0.217	0.0477884	1	WISP2
1.306e-264	2.1077	0.825	0.311	3.31555e-260	2	GAS1
1.88063e-260	2.98294	0.523	0.09	4.77434e-256	2	SCG5
5.86751e-259	1.8175	0.933	0.499	1.48959e-254	2	IL11
8.68793e-248	2.8875	0.504	0.086	2.2056e-243	2	RAB27B
1.95909e-208	2.19139	0.625	0.173	4.97354e-204	2	CDCP1
3.25236e-200	1.04775	0.969	0.693	8.25676e-196	2	GFPT2
9.1487e-190	1.03201	0.962	0.711	2.32258e-185	2	PHLDA1
1.75384e-186	2.15655	0.648	0.223	4.45247e-182	2	DNER
1.73686e-183	1.37356	0.894	0.518	4.40937e-179	2	TMEM158
1.49756e-181	3.15329	0.341	0.049	3.80186e-177	2	RAB3B
2.18474e-180	2.5994	0.512	0.132	5.54639e-176	2	GREM1
2.47199e-159	1.49979	0.777	0.356	6.27563e-155	2	ID1
2.64102e-158	0.881719	0.95	0.743	6.70476e-154	2	ANPEP
7.87368e-156	1.40371	0.834	0.431	1.99889e-151	2	COL7A1
1.99748e-155	0.842001	0.939	0.741	5.07099e-151	2	COTL1
1.00141e-150	0.921618	0.978	0.789	2.54227e-146	2	CXCL5
5.28602e-139	1.14351	0.88	0.579	1.34196e-134	2	ID3
3.41172e-134	1.54345	0.673	0.284	8.66132e-130	2	IRS1
7.82002e-132	1.10155	0.864	0.522	1.98527e-127	2	IRF2BPL
1.51921e-125	1.43414	0.695	0.306	3.85681e-121	2	DUSP4
4.0209e-117	1.76531	0.505	0.17	1.02079e-112	2	SH2B3
5.53549e-112	1.00058	0.857	0.509	1.40529e-107	2	POU2F2
2.76661e-110	0.828165	0.926	0.661	7.02359e-106	2	SMOC1
2.52756e-109	0.623756	0.946	0.798	6.41672e-105	2	BEX3
1.71196e-103	1.68561	0.502	0.184	4.34616e-99	2	CTHRC1
9.76948e-102	1.25387	0.664	0.301	2.48018e-97	2	PREX1
2.62071e-99	0.855608	0.898	0.69	6.6532e-95	2	ELN
6.861e-99	2.53454	0.255	0.051	1.7418e-94	2	SLC16A6
1.7312e-98	1.49401	0.632	0.312	4.39501e-94	2	FST
3.49988e-95	0.551549	0.954	0.839	8.88514e-91	2	MXRA7
4.138e-95	0.741378	0.9	0.672	1.05052e-90	2	PDIA4
3.74108e-94	0.550107	0.963	0.855	9.49748e-90	2	QSOX1
6.14364e-94	2.11153	0.306	0.076	1.55969e-89	2	ADAMTS12
3.77753e-93	1.25406	0.661	0.335	9.59001e-89	2	NQO2
8.94594e-93	1.57695	0.387	0.116	2.27111e-88	2	RAC2
1.29646e-92	1.77099	0.466	0.177	3.29131e-88	2	PORCN
5.26977e-87	0.971752	0.779	0.488	1.33784e-82	2	IVNS1ABP
8.76942e-87	1.93372	0.302	0.079	2.22629e-82	2	PLAT
4.97735e-86	1.62748	0.393	0.127	1.2636e-81	2	VEGFC
1.8474e-85	0.675245	0.937	0.742	4.68999e-81	2	FGF2
7.20277e-85	1.09609	0.689	0.355	1.82857e-80	2	TGM2
2.77995e-82	1.24213	0.597	0.284	7.05745e-78	2	STEAP3
2.44269e-80	1.00035	0.73	0.403	6.20125e-76	2	MIDN
1.41946e-78	1.16937	0.483	0.189	3.60358e-74	2	EREG
6.30809e-78	0.927908	0.749	0.453	1.60143e-73	2	SOCS3
7.70702e-78	0.833865	0.819	0.507	1.95658e-73	2	TFRC
2.12093e-77	0.744883	0.884	0.637	5.38441e-73	2	WNT5A
2.24098e-75	0.630004	0.9	0.748	5.68918e-71	2	RAB31
3.75708e-75	1.2634	0.556	0.266	9.53811e-71	2	EML1
6.8819e-75	1.81586	0.306	0.09	1.74711e-70	2	POPDC3
4.23e-73	0.836551	0.826	0.584	1.07387e-68	2	AKAP12
1.55069e-72	0.819965	0.803	0.558	3.93674e-68	2	FHL2
6.39259e-70	0.995073	0.691	0.399	1.62289e-65	2	DBN1
2.25728e-69	1.9751	0.261	0.072	5.73055e-65	2	FAM155A
3.37941e-69	1.32512	0.437	0.173	8.57932e-65	2	TMEM132A
7.82043e-69	1.27432	0.49	0.216	1.98537e-64	2	LIMK1
9.16648e-68	0.603994	0.919	0.71	2.32709e-63	2	HMGA1
1.69184e-67	1.12791	0.561	0.276	4.29509e-63	2	ABRACL
7.1479e-67	0.542787	0.947	0.797	1.81464e-62	2	MT1E
9.68559e-66	0.733762	0.819	0.549	2.45888e-61	2	SPCS3
2.01185e-65	0.785011	0.816	0.571	5.10749e-61	2	RASSF8
2.18205e-64	1.17866	0.51	0.234	5.53956e-60	2	SLC9A3R2
9.73446e-63	1.23794	0.508	0.245	2.47129e-58	2	IRX3
2.51467e-62	0.605766	0.927	0.704	6.38399e-58	2	C15orf48
7.36029e-61	0.89959	0.693	0.413	1.86856e-56	2	CDH13
2.27207e-60	0.591172	0.896	0.649	5.7681e-56	2	TNFRSF12A
2.35558e-60	1.34796	0.424	0.184	5.98011e-56	2	EVA1A
2.78674e-60	0.718614	0.805	0.563	7.0747e-56	2	MANF
9.03299e-59	1.03975	0.602	0.337	2.2932e-54	2	C12orf75
1.66564e-58	0.919991	0.603	0.318	4.22856e-54	2	PALMD
3.05211e-58	1.53426	0.307	0.107	7.74838e-54	2	HAS1
1.92561e-57	0.752671	0.762	0.509	4.88854e-53	2	TAF13
3.72328e-57	0.947119	0.638	0.374	9.45229e-53	2	PLAU
6.50421e-57	1.09484	0.554	0.294	1.65122e-52	2	ZNF827
7.5677e-57	0.500381	0.966	0.856	1.92121e-52	2	ACSL4
9.55618e-57	1.48059	0.314	0.112	2.42603e-52	2	TSHZ3
2.86059e-55	0.535393	0.907	0.757	7.26217e-51	2	CCND1
2.1433e-53	1.47994	0.294	0.104	5.44119e-49	2	ARHGAP18
2.86432e-53	1.08955	0.573	0.345	7.27164e-49	2	HAS2
4.87787e-53	0.661221	0.796	0.579	1.23834e-48	2	PDLIM7
6.55764e-53	0.561615	0.88	0.699	1.66479e-48	2	MGLL
3.07396e-52	0.70776	0.745	0.493	7.80387e-48	2	CDK2AP2
1.40179e-51	0.869425	0.669	0.41	3.55872e-47	2	SRPX2
1.73804e-51	0.563828	0.862	0.694	4.41237e-47	2	ATP2A2
1.8014e-51	0.591801	0.861	0.651	4.57322e-47	2	NAMPTP1
7.14385e-50	1.48235	0.303	0.116	1.81361e-45	2	LRRN3
4.23039e-49	0.919937	0.534	0.29	1.07397e-44	2	IL1B
1.68769e-47	0.887925	0.54	0.294	4.28455e-43	2	SDF2L1
4.74812e-47	0.536206	0.877	0.673	1.20541e-42	2	GPX8
5.38247e-47	1.21887	0.403	0.189	1.36645e-42	2	ATOH8
3.68107e-46	1.20955	0.427	0.213	9.34512e-42	2	CRADD
5.12931e-46	0.527726	0.917	0.826	1.30218e-41	2	TFPI2
2.26868e-45	0.543399	0.869	0.699	5.75951e-41	2	CYR61
4.21733e-45	0.975914	0.442	0.215	1.07065e-40	2	MICAL2
1.00273e-44	0.810906	0.635	0.394	2.54562e-40	2	DOK1
2.53935e-44	0.809531	0.639	0.401	6.44665e-40	2	CREG1
9.40411e-44	0.940503	0.473	0.244	2.38742e-39	2	CCDC71L
6.86042e-43	1.08932	0.38	0.174	1.74165e-38	2	TBX2
8.47879e-43	0.862557	0.532	0.295	2.15251e-38	2	BCL2L1
1.98324e-41	0.651672	0.763	0.555	5.03485e-37	2	ADSS
5.72276e-41	0.754409	0.647	0.418	1.45284e-36	2	HPCAL1
6.43144e-41	0.680584	0.723	0.498	1.63275e-36	2	MT1L
9.51409e-41	0.891708	0.529	0.299	2.41534e-36	2	SLC20A1
1.14479e-40	1.21624	0.303	0.126	2.90628e-36	2	FAM86DP
2.60057e-40	1.19124	0.346	0.16	6.60206e-36	2	STAMBPL1
2.77563e-40	0.963001	0.458	0.244	7.04648e-36	2	COMMD5
1.3773e-39	0.58848	0.784	0.577	3.49654e-35	2	AHR
1.49934e-39	1.07951	0.37	0.174	3.80637e-35	2	STX1A
6.02382e-39	1.18874	0.38	0.192	1.52927e-34	2	SLIT2
8.95233e-39	0.606564	0.757	0.536	2.27273e-34	2	MTND2P28
9.67646e-39	0.994425	0.426	0.222	2.45656e-34	2	STK17A
3.64606e-38	0.903969	0.481	0.268	9.25625e-34	2	WLS
4.51012e-38	1.03654	0.393	0.198	1.14498e-33	2	WDFY2
4.64073e-38	0.625138	0.737	0.524	1.17814e-33	2	AMOTL2
5.23543e-38	0.595784	0.751	0.537	1.32912e-33	2	MAP7D1
7.09834e-38	1.17029	0.289	0.121	1.80206e-33	2	DNAJB5
7.70218e-38	0.72036	0.64	0.408	1.95535e-33	2	PITPNM1
1.10781e-37	0.68829	0.581	0.347	2.8124e-33	2	SEC11C
1.20012e-37	1.06785	0.37	0.181	3.04675e-33	2	IL24
3.54976e-37	1.06172	0.362	0.178	9.01179e-33	2	NT5DC2
6.2909e-37	0.624539	0.715	0.483	1.59707e-32	2	DDA1
7.55355e-37	0.915867	0.401	0.2	1.91762e-32	2	HMGA2
1.28921e-36	0.748323	0.587	0.361	3.27293e-32	2	IL4R
1.38855e-36	0.554207	0.77	0.565	3.52511e-32	2	ZC3HAV1
1.91421e-36	0.69573	0.656	0.443	4.85961e-32	2	ZNF281
2.91782e-36	1.27098	0.255	0.103	7.40746e-32	2	ENC1
3.54693e-36	1.01214	0.365	0.178	9.0046e-32	2	ORAI1
4.07879e-36	0.769589	0.537	0.317	1.03548e-31	2	PTS
5.43455e-36	0.643158	0.706	0.505	1.37967e-31	2	TUBA1A
5.67387e-36	0.811004	0.538	0.326	1.44043e-31	2	BIN1
6.05295e-36	0.786856	0.504	0.281	1.53666e-31	2	GLRX2
8.72704e-36	0.735233	0.601	0.385	2.21553e-31	2	PDHB
3.2469e-35	1.05457	0.346	0.167	8.24292e-31	2	PVR
3.80741e-35	0.546071	0.766	0.563	9.66587e-31	2	COX17
6.224e-35	0.941864	0.303	0.133	1.58009e-30	2	FICD
9.43924e-35	0.885392	0.499	0.297	2.39634e-30	2	CLCF1
1.19728e-34	0.930859	0.417	0.222	3.03953e-30	2	SLC26A2
2.07811e-34	0.812338	0.481	0.272	5.2757e-30	2	LINC01588
2.878e-34	0.614736	0.701	0.488	7.30637e-30	2	RARG
3.16459e-34	0.534068	0.763	0.572	8.03395e-30	2	HERPUD1
3.41528e-34	1.28359	0.286	0.129	8.67037e-30	2	CCL7
3.60658e-34	0.744145	0.523	0.302	9.15603e-30	2	CRELD2
3.77796e-34	0.777834	0.398	0.201	9.59111e-30	2	MT1F
5.83869e-34	0.835369	0.47	0.265	1.48227e-29	2	RTL6
7.18676e-34	0.867522	0.437	0.239	1.8245e-29	2	MID1
1.00399e-33	0.77289	0.568	0.362	2.54882e-29	2	LPXN
1.75843e-33	0.809263	0.463	0.256	4.46412e-29	2	GPR68
1.87453e-33	0.741482	0.583	0.378	4.75887e-29	2	LSM6
2.39157e-33	1.06716	0.302	0.139	6.07148e-29	2	CCBE1
3.01226e-33	0.532774	0.77	0.566	7.64724e-29	2	MLEC
3.50306e-33	0.852807	0.459	0.257	8.89323e-29	2	VDR
6.61425e-33	0.57482	0.784	0.632	1.67916e-28	2	STC2
8.4994e-33	0.758466	0.523	0.308	2.15774e-28	2	SLC38A5
1.2352e-32	0.673238	0.62	0.408	3.13581e-28	2	FKBP14
2.17973e-32	0.805727	0.505	0.3	5.53369e-28	2	TLE3
2.42189e-32	0.88647	0.443	0.251	6.14846e-28	2	IL7R
2.47678e-32	0.57804	0.717	0.52	6.28781e-28	2	S100A16
2.94673e-32	0.589554	0.698	0.485	7.48088e-28	2	SRSF2
4.63446e-32	0.589218	0.68	0.474	1.17655e-27	2	TXNDC15
5.03183e-32	1.26482	0.261	0.116	1.27743e-27	2	NTM
6.22525e-32	0.658511	0.583	0.362	1.5804e-27	2	RFLNB
9.02012e-32	0.815576	0.481	0.284	2.28994e-27	2	CYB561
1.69807e-31	0.54618	0.752	0.556	4.31088e-27	2	FAM3C
8.45966e-31	0.552069	0.723	0.536	2.14765e-26	2	IPO5
9.05055e-31	0.903902	0.407	0.226	2.29766e-26	2	SV2A
1.717e-30	0.68938	0.579	0.372	4.35894e-26	2	FAM98A
1.74529e-30	0.512949	0.772	0.598	4.43077e-26	2	MACF1
1.75607e-30	0.824102	0.429	0.238	4.45812e-26	2	TUBG1
1.93852e-30	0.905154	0.391	0.212	4.92132e-26	2	GPR161
1.9582e-30	0.677933	0.595	0.404	4.97128e-26	2	P3H4
3.91763e-30	0.578395	0.682	0.476	9.9457e-26	2	SH3KBP1
5.23745e-30	1.0496	0.373	0.204	1.32963e-25	2	CPM
5.62435e-30	0.706237	0.538	0.335	1.42785e-25	2	GLIPR1
2.36679e-29	0.831327	0.468	0.281	6.00856e-25	2	CDR2L
3.91444e-29	0.724935	0.525	0.327	9.93758e-25	2	DUSP5
4.11372e-29	0.885529	0.342	0.175	1.04435e-24	2	TRIM14
5.1056e-29	0.618657	0.596	0.385	1.29616e-24	2	PKD2
5.46487e-29	0.85632	0.471	0.29	1.38737e-24	2	PTGS1
1.02227e-28	0.854587	0.472	0.292	2.59524e-24	2	ERFE
1.3442e-28	0.771372	0.45	0.262	3.41252e-24	2	PTER
3.46486e-28	0.777383	0.45	0.264	8.79624e-24	2	SH3BP5L
4.95268e-28	0.544003	0.659	0.448	1.25734e-23	2	HNRNPAB
5.2208e-28	0.563539	0.685	0.489	1.32541e-23	2	OAS1
6.77569e-28	0.74635	0.45	0.261	1.72014e-23	2	SEMA4C
8.06628e-28	0.758428	0.473	0.287	2.04779e-23	2	COL16A1
1.43758e-27	0.545444	0.731	0.558	3.64958e-23	2	MPZL1
3.3562e-27	0.82141	0.386	0.214	8.52038e-23	2	FAM214B
3.74193e-27	0.810735	0.353	0.187	9.49964e-23	2	EPB41L3
3.95407e-27	0.503858	0.751	0.563	1.00382e-22	2	IL1R1
1.02661e-26	0.715487	0.447	0.263	2.60625e-22	2	FAH
1.04626e-26	0.566078	0.659	0.48	2.65614e-22	2	KANK2
1.29583e-26	0.580696	0.568	0.37	3.28973e-22	2	SLC35B1
1.41576e-26	0.693409	0.484	0.298	3.5942e-22	2	CRELD1
1.43458e-26	0.702646	0.496	0.307	3.64196e-22	2	FTSJ1
1.88248e-26	0.650007	0.508	0.318	4.77906e-22	2	HIPK2
2.61957e-26	0.771555	0.296	0.145	6.6503e-22	2	HBEGF
3.54636e-26	0.539026	0.665	0.458	9.00315e-22	2	PRRC1
4.55299e-26	1.03298	0.259	0.123	1.15587e-21	2	ERCC2
9.01148e-26	0.824421	0.361	0.199	2.28774e-21	2	KLF16
1.0256e-25	0.54669	0.609	0.403	2.6037e-21	2	SLC16A7
1.04443e-25	0.981291	0.298	0.152	2.65149e-21	2	RGMB
1.06885e-25	0.595407	0.57	0.369	2.71348e-21	2	ALDH3B1
1.3478e-25	0.980522	0.328	0.179	3.42166e-21	2	WFDC21P
1.65016e-25	0.882866	0.366	0.206	4.18927e-21	2	ITGA2
2.39332e-25	0.553493	0.673	0.498	6.07591e-21	2	COL8A1
2.66524e-25	0.840368	0.329	0.172	6.76625e-21	2	WFS1
3.48431e-25	0.77947	0.403	0.235	8.84561e-21	2	SH3BP4
5.49561e-25	0.774536	0.34	0.179	1.39517e-20	2	ABCC3
8.8852e-25	0.760406	0.516	0.354	2.25569e-20	2	PGF
1.30729e-24	0.772432	0.351	0.19	3.31882e-20	2	H2AFY2
1.79524e-24	0.600229	0.567	0.376	4.55759e-20	2	LAMB1
1.87724e-24	0.709738	0.496	0.319	4.76576e-20	2	CEP170
1.96455e-24	0.647216	0.491	0.307	4.9874e-20	2	TRMT10C
1.9797e-24	0.850372	0.342	0.187	5.02586e-20	2	SLC35B4
7.24307e-24	0.601203	0.504	0.317	1.8388e-19	2	MTHFD2L
7.71695e-24	0.514702	0.705	0.528	1.9591e-19	2	IGSF8
1.54959e-23	0.568227	0.609	0.441	3.93394e-19	2	MFF
1.9538e-23	0.562988	0.603	0.416	4.96012e-19	2	FURIN
3.57792e-23	0.5818	0.518	0.33	9.08326e-19	2	EMG1
3.90153e-23	0.719157	0.404	0.237	9.90481e-19	2	RIDA
4.04921e-23	0.574849	0.523	0.341	1.02797e-18	2	GTF3C6
4.39345e-23	0.510112	0.675	0.501	1.11537e-18	2	ZBTB38
5.18547e-23	0.613111	0.508	0.326	1.31643e-18	2	TTYH3
9.58854e-23	0.627472	0.479	0.305	2.43424e-18	2	REST
1.12335e-22	0.820314	0.371	0.217	2.85184e-18	2	TWF2
1.1318e-22	0.650338	0.473	0.303	2.87329e-18	2	ANTXR2
1.16175e-22	0.825124	0.303	0.161	2.94934e-18	2	KLF13
1.27431e-22	0.589918	0.528	0.344	3.23508e-18	2	ASAP1
1.34797e-22	0.600879	0.55	0.371	3.42209e-18	2	ADI1
3.90392e-22	1.06195	0.276	0.147	9.91088e-18	2	MSX1
5.05772e-22	0.628737	0.457	0.285	1.284e-17	2	PHF23
5.29705e-22	0.78775	0.366	0.217	1.34476e-17	2	NEK6
5.31668e-22	0.900551	0.296	0.158	1.34974e-17	2	NTN1
7.34399e-22	0.538194	0.542	0.36	1.86442e-17	2	SAMD9
7.87475e-22	0.59241	0.534	0.357	1.99916e-17	2	TCAF1
1.02749e-21	0.545946	0.532	0.354	2.60849e-17	2	DNAJB11
1.27281e-21	0.860159	0.289	0.156	3.23129e-17	2	SERINC2
1.43924e-21	0.890633	0.301	0.165	3.65379e-17	2	SBSN
1.44233e-21	0.5272	0.596	0.408	3.66164e-17	2	ARPC5L
1.55851e-21	0.968657	0.275	0.145	3.9566e-17	2	FOXO1
1.69755e-21	0.506167	0.567	0.38	4.30956e-17	2	SPRY2
1.97029e-21	0.591786	0.509	0.336	5.00197e-17	2	HEG1
2.25707e-21	0.632591	0.472	0.303	5.73003e-17	2	LRIG1
3.73431e-21	0.670474	0.419	0.258	9.48029e-17	2	LYPLA1
4.04509e-21	0.68122	0.38	0.226	1.02693e-16	2	PIK3R1
4.5202e-21	0.662302	0.44	0.275	1.14754e-16	2	PPP1R14C
6.19227e-21	0.612975	0.45	0.283	1.57203e-16	2	SMIM12
1.00731e-20	0.550884	0.506	0.334	2.55727e-16	2	GMPPA
1.68814e-20	0.795272	0.26	0.134	4.28567e-16	2	C3
2.71382e-20	0.919685	0.276	0.148	6.88957e-16	2	PACSIN3
4.2889e-20	0.658916	0.4	0.246	1.08882e-15	2	NCS1
4.7425e-20	0.624332	0.443	0.281	1.20398e-15	2	SLC33A1
5.23716e-20	0.501333	0.589	0.417	1.32956e-15	2	SRP19
5.71858e-20	0.593316	0.499	0.331	1.45177e-15	2	HSPB11
5.99207e-20	0.608392	0.407	0.25	1.52121e-15	2	SVIL
7.1543e-20	0.778057	0.394	0.252	1.81626e-15	2	CMKLR1
1.31669e-19	0.558836	0.45	0.288	3.34269e-15	2	POP7
1.72846e-19	0.543602	0.517	0.342	4.38804e-15	2	SRF
2.41678e-19	0.571389	0.429	0.269	6.13547e-15	2	SKAP2
3.73282e-19	0.812694	0.353	0.217	9.4765e-15	2	MMP13
4.35402e-19	0.63598	0.463	0.307	1.10536e-14	2	SGK1
5.55551e-19	0.669629	0.315	0.179	1.41038e-14	2	C12orf49
5.9171e-19	0.651062	0.351	0.207	1.50217e-14	2	ARSD
7.20635e-19	0.518967	0.545	0.384	1.82948e-14	2	SLC4A7
1.37647e-18	0.54043	0.535	0.377	3.49443e-14	2	AGFG1
1.71814e-18	0.638413	0.358	0.214	4.36185e-14	2	PYGO2
1.96995e-18	0.573179	0.39	0.237	5.00111e-14	2	GRB10
2.23623e-18	0.532426	0.431	0.27	5.6771e-14	2	NUDT2
2.37166e-18	0.654067	0.401	0.255	6.02094e-14	2	FHOD1
3.76535e-18	0.555066	0.494	0.334	9.5591e-14	2	MPHOSPH6
3.80851e-18	0.61499	0.426	0.279	9.66868e-14	2	TMEM70
4.45037e-18	0.599861	0.373	0.226	1.12982e-13	2	MRAS
6.01725e-18	0.658699	0.315	0.183	1.5276e-13	2	OSTF1
6.53869e-18	0.744632	0.3	0.172	1.65998e-13	2	GAS2L1
7.31318e-18	0.672957	0.273	0.15	1.8566e-13	2	ACSL1
8.20443e-18	0.729668	0.314	0.183	2.08286e-13	2	GLE1
8.5809e-18	0.523957	0.536	0.378	2.17843e-13	2	ITGA1
1.21341e-17	0.605457	0.406	0.26	3.08048e-13	2	PRICKLE2
1.4935e-17	0.804511	0.259	0.142	3.79156e-13	2	L3HYPDH
1.57178e-17	0.645773	0.375	0.236	3.99029e-13	2	LDLRAP1
1.6638e-17	0.713529	0.342	0.206	4.22389e-13	2	SLC19A3
2.04695e-17	0.528001	0.506	0.346	5.1966e-13	2	PARP1
2.17765e-17	0.689274	0.316	0.188	5.52841e-13	2	PREB
2.47806e-17	0.828347	0.28	0.161	6.29104e-13	2	NAT14
2.5674e-17	0.780175	0.279	0.159	6.51785e-13	2	EPHB2
3.19434e-17	0.621524	0.383	0.239	8.10948e-13	2	IGF2BP2
3.57118e-17	0.701677	0.3	0.175	9.06615e-13	2	FZD2
3.5969e-17	0.526843	0.482	0.325	9.13144e-13	2	CTSO
3.66335e-17	0.513695	0.581	0.43	9.30013e-13	2	CAMK2N1
4.54312e-17	0.759974	0.274	0.156	1.15336e-12	2	CBX4
4.75763e-17	0.780328	0.28	0.161	1.20782e-12	2	C10orf90
5.16045e-17	0.675647	0.338	0.204	1.31008e-12	2	ATRN
5.7229e-17	0.598029	0.36	0.218	1.45287e-12	2	PDE8A
1.01784e-16	0.691198	0.289	0.168	2.58398e-12	2	MLKL
1.1093e-16	0.716046	0.255	0.14	2.81619e-12	2	TBC1D9
1.13471e-16	0.749377	0.302	0.181	2.88068e-12	2	SNTB1
1.24176e-16	0.69337	0.266	0.148	3.15245e-12	2	MOB1B
1.25841e-16	0.518872	0.478	0.328	3.19473e-12	2	AC116347.1
1.34953e-16	0.717335	0.301	0.177	3.42606e-12	2	IFT27
2.20716e-16	0.541363	0.492	0.339	5.60331e-12	2	MAGEF1
2.57525e-16	0.621669	0.348	0.216	6.53779e-12	2	KLHL42
2.58255e-16	0.598359	0.446	0.306	6.55632e-12	2	KDELR3
3.54463e-16	0.562018	0.364	0.229	8.99875e-12	2	HNMT
3.88386e-16	0.611813	0.406	0.272	9.85994e-12	2	SLC52A2
5.12293e-16	0.607799	0.272	0.154	1.30056e-11	2	GMPPB
5.29747e-16	0.507758	0.433	0.282	1.34487e-11	2	PLEKHA3
5.35407e-16	0.627917	0.309	0.185	1.35924e-11	2	C1orf216
5.75213e-16	0.644554	0.341	0.214	1.46029e-11	2	DPP4
6.24854e-16	0.834437	0.255	0.145	1.58632e-11	2	SOCS6
6.58253e-16	0.506549	0.484	0.331	1.67111e-11	2	CHST14
8.28349e-16	0.506282	0.407	0.264	2.10293e-11	2	TRIM27
9.77649e-16	0.580456	0.361	0.228	2.48196e-11	2	SYVN1
9.93908e-16	0.542029	0.419	0.275	2.52324e-11	2	CERK
9.99038e-16	0.525745	0.468	0.325	2.53626e-11	2	LEPROTL1
1.50814e-15	0.651247	0.28	0.163	3.82872e-11	2	TUSC1
1.53463e-15	0.508128	0.484	0.341	3.89596e-11	2	APEH
1.59458e-15	0.670875	0.282	0.165	4.04815e-11	2	EPG5
1.81787e-15	0.680948	0.267	0.154	4.61502e-11	2	SNHG9
1.99474e-15	0.503095	0.496	0.351	5.06405e-11	2	ISOC2
2.3529e-15	0.673888	0.29	0.171	5.9733e-11	2	LINC01184
2.71445e-15	0.598756	0.359	0.227	6.89118e-11	2	AGO1
2.79938e-15	0.603487	0.404	0.269	7.10678e-11	2	MRPL15
2.84717e-15	0.617759	0.348	0.221	7.22811e-11	2	CYB5R2
3.30345e-15	0.511256	0.459	0.314	8.38647e-11	2	HTATSF1
3.70615e-15	0.680324	0.285	0.17	9.40881e-11	2	FAM89A
4.16372e-15	0.520488	0.481	0.336	1.05704e-10	2	SLC35A2
4.52373e-15	0.581529	0.383	0.248	1.14844e-10	2	ABCF3
4.75132e-15	0.631181	0.257	0.146	1.20622e-10	2	CPPED1
5.17442e-15	0.592539	0.397	0.264	1.31363e-10	2	TMEM87B
5.26218e-15	0.540376	0.406	0.271	1.33591e-10	2	MAGEH1
5.51122e-15	0.736094	0.266	0.155	1.39913e-10	2	TEAD3
6.21505e-15	0.535688	0.411	0.272	1.57781e-10	2	TAF10
6.583e-15	0.532885	0.339	0.21	1.67123e-10	2	WDR12
7.48057e-15	0.63476	0.273	0.158	1.89909e-10	2	TKFC
8.92798e-15	0.614823	0.388	0.258	2.26655e-10	2	FRG1CP
9.32953e-15	0.692632	0.26	0.152	2.36849e-10	2	CBL
9.57612e-15	0.578105	0.486	0.364	2.43109e-10	2	SFRP2
9.81052e-15	0.65447	0.305	0.187	2.4906e-10	2	PDCL3
1.06355e-14	0.64245	0.273	0.16	2.70003e-10	2	SELENOI
1.26859e-14	0.614956	0.327	0.203	3.22056e-10	2	TSPAN17
1.4932e-14	0.660301	0.282	0.169	3.79079e-10	2	TPST2
1.79467e-14	0.520893	0.341	0.213	4.55613e-10	2	BTBD7
1.96242e-14	0.649918	0.322	0.205	4.98199e-10	2	TAOK2
2.17888e-14	0.561119	0.346	0.219	5.53152e-10	2	COG6
2.44248e-14	0.582391	0.335	0.212	6.20072e-10	2	MTURN
2.56806e-14	0.571596	0.292	0.175	6.51954e-10	2	PNP
2.92092e-14	0.59775	0.259	0.15	7.41533e-10	2	AC073869.1
3.19204e-14	0.567175	0.326	0.205	8.10364e-10	2	RTTN
3.33695e-14	0.518878	0.411	0.282	8.47153e-10	2	RBBP4
3.49666e-14	0.532506	0.365	0.236	8.87697e-10	2	ORAI2
3.57227e-14	0.507447	0.385	0.253	9.06893e-10	2	SERPINB8
4.31732e-14	0.520096	0.38	0.247	1.09604e-09	2	ADAMTS6
4.51331e-14	0.60014	0.276	0.164	1.14579e-09	2	EVI5
4.55099e-14	0.644353	0.344	0.224	1.15536e-09	2	TPST1
5.14389e-14	0.60569	0.257	0.151	1.30588e-09	2	RSBN1L
5.27469e-14	0.5375	0.419	0.289	1.33909e-09	2	CNDP2
5.58595e-14	0.563414	0.347	0.225	1.4181e-09	2	ZNF275
5.79783e-14	0.522057	0.373	0.242	1.4719e-09	2	LRBA
6.37748e-14	0.510104	0.396	0.263	1.61905e-09	2	CHCHD5
7.34199e-14	0.581668	0.321	0.204	1.86391e-09	2	MOGS
7.45136e-14	0.50663	0.387	0.257	1.89168e-09	2	CPSF6
8.33215e-14	0.564573	0.346	0.223	2.11528e-09	2	MARCKSL1
9.42572e-14	0.589801	0.307	0.193	2.39291e-09	2	SMAD6
9.51436e-14	0.509906	0.388	0.255	2.41541e-09	2	PDIA3P1
1.12323e-13	0.546287	0.345	0.22	2.85153e-09	2	VARS
1.42231e-13	0.53947	0.255	0.148	3.61081e-09	2	POLR1C
1.50589e-13	0.66953	0.287	0.177	3.82299e-09	2	SLC30A5
1.51176e-13	0.559411	0.312	0.195	3.83792e-09	2	HMGXB3
1.78308e-13	0.503547	0.523	0.393	4.52669e-09	2	SFRP1
2.6854e-13	0.55815	0.364	0.239	6.81743e-09	2	AL359918.1
2.72247e-13	0.661989	0.305	0.192	6.91154e-09	2	KLF12
3.33693e-13	0.685777	0.25	0.148	8.47146e-09	2	NUDT16L1
4.57358e-13	0.518099	0.419	0.29	1.1611e-08	2	RHBDF1
7.3575e-13	0.653676	0.27	0.166	1.86785e-08	2	MINPP1
7.42636e-13	0.642613	0.299	0.193	1.88533e-08	2	CSTF3
8.50089e-13	0.587868	0.3	0.19	2.15812e-08	2	C11orf84
1.10265e-12	0.614648	0.263	0.16	2.7993e-08	2	NCKAP5L
1.27256e-12	0.62258	0.283	0.177	3.23065e-08	2	ZHX3
1.29928e-12	0.708795	0.254	0.155	3.29849e-08	2	MMD
1.65456e-12	0.555048	0.309	0.198	4.20042e-08	2	CASP3
2.1765e-12	0.556299	0.419	0.302	5.52548e-08	2	IL13RA2
2.57403e-12	0.531316	0.32	0.208	6.53469e-08	2	GOLGA5
4.105e-12	0.53138	0.295	0.186	1.04214e-07	2	PNKP
4.49265e-12	0.57657	0.322	0.214	1.14055e-07	2	ASB1
5.51401e-12	0.513263	0.274	0.17	1.39984e-07	2	QSOX2
6.06228e-12	0.587421	0.314	0.205	1.53903e-07	2	WIPI1
7.21128e-12	0.517053	0.326	0.214	1.83073e-07	2	CEBPG
7.79297e-12	0.50796	0.307	0.198	1.9784e-07	2	TUSC2
9.88617e-12	0.564105	0.256	0.158	2.5098e-07	2	AC098614.1
1.19714e-11	0.610861	0.272	0.173	3.03918e-07	2	ELMOD2
1.24735e-11	0.549191	0.327	0.219	3.16665e-07	2	C1orf131
1.44203e-11	0.562228	0.331	0.221	3.66089e-07	2	DTX3
1.46376e-11	0.529855	0.335	0.225	3.71604e-07	2	ZNF217
1.64168e-11	0.570863	0.274	0.173	4.16774e-07	2	RPRD1A
1.75105e-11	0.609529	0.264	0.165	4.44538e-07	2	DOCK5
2.78086e-11	0.528896	0.287	0.184	7.05977e-07	2	ADO
3.80196e-11	0.532471	0.257	0.161	9.65203e-07	2	NSDHL
4.13679e-11	0.515989	0.322	0.217	1.05021e-06	2	XRCC1
4.52798e-11	0.532928	0.281	0.18	1.14952e-06	2	EEF1AKMT1
5.21168e-11	0.637688	0.259	0.166	1.32309e-06	2	MAP9
5.84106e-11	0.546673	0.292	0.191	1.48287e-06	2	DGKZ
6.27337e-11	0.500374	0.316	0.211	1.59262e-06	2	ATAD3A
1.0393e-10	0.529876	0.307	0.205	2.63848e-06	2	AIFM1
1.09862e-10	0.524686	0.283	0.184	2.78907e-06	2	LARP1B
2.21397e-10	0.505056	0.25	0.157	5.6206e-06	2	FAM35A
2.7793e-10	0.558959	0.273	0.178	7.05581e-06	2	RPAP3
4.33692e-10	0.512452	0.303	0.206	1.10101e-05	2	TGS1
4.71762e-10	0.596876	0.273	0.181	1.19766e-05	2	XXYLT1
5.50226e-10	0.567077	0.268	0.176	1.39686e-05	2	SLC35C1
8.07249e-10	0.503998	0.25	0.159	2.04936e-05	2	GSTZ1
1.01879e-09	0.504326	0.269	0.177	2.58641e-05	2	LINC00467
1.65848e-09	0.523591	0.262	0.175	4.21039e-05	2	AL390039.1
2.32231e-09	0.548108	0.267	0.18	5.89564e-05	2	DLAT
2.393e-09	0.634396	0.283	0.199	6.07511e-05	2	PTPRN
2.49037e-09	0.570847	0.279	0.187	6.3223e-05	2	SLC25A17
2.57495e-09	0.545326	0.279	0.19	6.53704e-05	2	EXOSC4
2.70947e-09	0.51888	0.334	0.237	6.87852e-05	2	GALNT5
2.99647e-09	0.527981	0.266	0.177	7.60713e-05	2	PSME2P2
5.76079e-09	0.503176	0.272	0.183	0.000146249	2	MEX3D
5.79811e-09	0.531029	0.275	0.187	0.000147197	2	ERAP2
1.14615e-08	0.534824	0.263	0.178	0.000290972	2	C6orf203
5.98792e-222	0.590897	1	0.991	1.52015e-217	3	HSP90AA1
2.41302e-187	0.904314	0.967	0.883	6.12595e-183	3	HSPD1
2.65462e-178	1.31505	0.944	0.724	6.73927e-174	3	FOSL1
5.85194e-175	1.4447	0.928	0.63	1.48563e-170	3	HSPH1
1.33414e-171	0.581626	0.998	0.983	3.38699e-167	3	ANXA5
7.16797e-171	2.20029	0.751	0.303	1.81973e-166	3	GPATCH4
4.81797e-158	1.1714	0.933	0.719	1.22314e-153	3	HMGA1
9.74464e-156	1.18489	0.926	0.744	2.47387e-151	3	DDX21
2.19349e-155	1.11193	0.978	0.808	5.56861e-151	3	PPP1R15A
1.56203e-146	1.08458	0.913	0.71	3.96554e-142	3	CCT6A
8.50924e-142	1.16575	0.924	0.659	2.16024e-137	3	TNFRSF12A
2.99726e-138	0.585459	0.993	0.948	7.60913e-134	3	ATF4
1.02524e-134	0.628776	0.978	0.934	2.60279e-130	3	NCL
1.67905e-134	1.05318	0.911	0.761	4.26261e-130	3	RSL1D1
6.15746e-134	0.554087	0.991	0.945	1.56319e-129	3	RAN
3.48038e-123	0.626249	0.957	0.911	8.83563e-119	3	SERBP1
9.81212e-120	1.87012	0.716	0.371	2.491e-115	3	FAM180A
3.72038e-117	0.940414	0.928	0.78	9.44494e-113	3	SLC43A3
1.11093e-112	0.744521	0.942	0.845	2.82032e-108	3	NPM1P27
9.97524e-112	1.24142	0.874	0.662	2.53241e-107	3	BMP2
1.67732e-109	0.918484	0.891	0.747	4.25822e-105	3	CCT2
4.32248e-108	1.2597	0.827	0.563	1.09735e-103	3	STIP1
2.55241e-107	1.5914	0.751	0.439	6.4798e-103	3	NOLC1
2.08078e-106	1.62578	0.727	0.407	5.28249e-102	3	BCCIP
2.89304e-106	1.67422	0.735	0.416	7.34456e-102	3	WDR43
3.39153e-106	0.877966	0.935	0.817	8.61008e-102	3	SLC3A2
9.77191e-105	1.75566	0.705	0.371	2.4808e-100	3	ODC1
5.69476e-102	1.73803	0.707	0.387	1.44573e-97	3	RCC1
1.37911e-101	1.09038	0.839	0.599	3.50114e-97	3	NME1
1.21613e-99	0.512596	0.994	0.961	3.08739e-95	3	ADM
9.06183e-98	0.536388	0.957	0.914	2.30053e-93	3	KPNB1
4.93646e-96	1.54017	0.77	0.466	1.25322e-91	3	KDM6B
9.81269e-96	0.819268	0.907	0.759	2.49115e-91	3	EIF1AX
1.5713e-95	0.885289	0.885	0.739	3.98906e-91	3	RPL7L1
2.38632e-95	0.568075	0.944	0.91	6.05815e-91	3	HNRNPU
7.78549e-92	0.955106	0.866	0.708	1.9765e-87	3	HSPA9
9.9086e-92	2.76891	0.319	0.069	2.5155e-87	3	GPAT3
9.27323e-91	1.21062	0.807	0.524	2.3542e-86	3	TFRC
8.49393e-90	1.42873	0.718	0.454	2.15635e-85	3	EIF4A1P10
1.67641e-89	0.829849	0.885	0.78	4.2559e-85	3	LRRFIP1
2.30775e-89	0.584648	0.959	0.917	5.85868e-85	3	GSTO1
6.47167e-88	0.664509	0.935	0.836	1.64296e-83	3	FUS
5.93597e-87	1.43959	0.709	0.431	1.50696e-82	3	FKBP4
9.35307e-87	0.551528	0.944	0.905	2.37446e-82	3	SET
4.26627e-86	1.58865	0.679	0.363	1.08308e-81	3	IRAK2
3.98194e-84	1.87087	0.568	0.252	1.0109e-79	3	NOP16
7.6004e-84	1.03078	0.816	0.623	1.92951e-79	3	SNRPD1
2.51496e-83	1.85139	0.586	0.275	6.38472e-79	3	CHORDC1
5.81907e-83	0.664925	0.97	0.931	1.47729e-78	3	CXCL2
1.59461e-82	1.14373	0.787	0.59	4.04825e-78	3	EIF3J
1.76401e-79	0.620747	0.917	0.846	4.47828e-75	3	G3BP1
3.65702e-79	0.776412	0.931	0.82	9.28406e-75	3	ATP2B1
4.2153e-79	0.724517	0.891	0.785	1.07014e-74	3	HNRNPA3
1.33514e-78	0.800369	0.911	0.781	3.38953e-74	3	ERRFI1
5.65981e-78	0.754235	0.865	0.755	1.43686e-73	3	PTBP1
2.78258e-77	0.822621	0.857	0.714	7.06413e-73	3	CYCS
4.6521e-76	0.833493	0.859	0.716	1.18103e-71	3	SNRPB
7.11427e-76	0.844851	0.859	0.702	1.8061e-71	3	EIF4G1
1.58581e-75	0.889032	0.835	0.659	4.0259e-71	3	NOL7
1.67859e-75	0.882687	0.837	0.677	4.26143e-71	3	SFPQ
2.09351e-75	0.666536	0.883	0.803	5.3148e-71	3	SYNCRIP
2.70808e-74	0.703679	0.881	0.782	6.87501e-70	3	PSMB7
4.19078e-73	1.19571	0.753	0.505	1.06391e-68	3	AGO2
3.9344e-72	0.546608	0.928	0.868	9.98825e-68	3	EIF5A
1.20826e-71	1.11113	0.75	0.538	3.0674e-67	3	CCT5
1.6738e-71	0.791969	0.863	0.753	4.24926e-67	3	EIF3A
7.45252e-71	1.32236	0.714	0.48	1.89197e-66	3	DKC1
8.4277e-71	0.688862	0.909	0.816	2.13954e-66	3	PRRC2C
1.30876e-70	0.878466	0.816	0.673	3.32256e-66	3	CCT7
1.41624e-69	1.29753	0.712	0.491	3.59541e-65	3	GTPBP4
1.96306e-69	1.90567	0.518	0.239	4.98363e-65	3	TBX3
3.47741e-68	0.737942	0.827	0.742	8.82811e-64	3	HSPE1
1.07069e-67	0.654376	0.926	0.837	2.71816e-63	3	DNAJA1
1.25567e-67	0.569265	0.931	0.861	3.18776e-63	3	RPL24P4
2.64317e-67	0.748828	0.842	0.737	6.71021e-63	3	HNRNPD
5.56563e-67	1.24173	0.701	0.486	1.41295e-62	3	NOP58
1.10467e-66	0.702929	0.846	0.765	2.80443e-62	3	PA2G4
2.33732e-66	0.750987	0.852	0.728	5.93376e-62	3	EIF5B
2.27031e-65	0.814513	0.82	0.692	5.76365e-61	3	MRPL52
5.64856e-65	1.15417	0.722	0.521	1.434e-60	3	RPF2
8.92943e-65	1.3065	0.668	0.425	2.26691e-60	3	RPF1
1.78752e-63	1.52073	0.599	0.351	4.53797e-59	3	MRTO4
7.51533e-63	0.698608	0.844	0.74	1.90792e-58	3	CCT3
1.04146e-62	0.965914	0.82	0.65	2.64395e-58	3	BIRC3
1.31573e-62	0.781664	0.866	0.775	3.34023e-58	3	EIF5
3.49068e-62	1.0976	0.738	0.511	8.8618e-58	3	ETS1
4.57651e-62	0.806259	0.813	0.704	1.16184e-57	3	SSRP1
3.80135e-61	0.975314	0.761	0.582	9.65048e-57	3	FUBP1
1.25369e-60	0.747166	0.824	0.721	3.18274e-56	3	CCT8
1.66893e-60	0.786956	0.835	0.702	4.2369e-56	3	KCNMA1
3.5152e-60	1.88902	0.481	0.221	8.92404e-56	3	AEN
1.25637e-59	0.50265	0.929	0.86	3.18955e-55	3	PRDX1
1.82525e-59	1.70666	0.529	0.264	4.63377e-55	3	GADD45A
2.05651e-59	1.83852	0.468	0.208	5.22087e-55	3	SLC38A1
3.58632e-59	1.18135	0.692	0.458	9.1046e-55	3	ABCE1
3.74792e-59	1.14924	0.738	0.552	9.51484e-55	3	ABL2
5.16595e-59	0.738048	0.839	0.724	1.31148e-54	3	HNRNPM
5.71629e-59	0.717176	0.833	0.729	1.45119e-54	3	SRSF3
1.00337e-57	0.639663	0.878	0.813	2.54725e-53	3	HSPA8
6.93026e-57	1.44296	0.596	0.359	1.75938e-52	3	CDK6
2.31245e-56	1.26586	0.653	0.434	5.87061e-52	3	NFKBIB
1.12367e-55	1.56567	0.536	0.292	2.85267e-51	3	LYAR
2.02223e-55	1.06613	0.699	0.504	5.13384e-51	3	CCT4
3.25697e-55	1.76732	0.479	0.233	8.26848e-51	3	PNO1
1.20217e-54	1.48328	0.553	0.311	3.05195e-50	3	TOMM40
1.29316e-54	1.17185	0.679	0.496	3.28295e-50	3	ELK3
2.50152e-54	0.612057	0.844	0.774	6.35061e-50	3	TRIM28
1.12465e-53	0.781526	0.77	0.655	2.85515e-49	3	SLIRP
1.17527e-53	1.12209	0.692	0.472	2.98366e-49	3	KDM7A
1.86509e-53	1.07298	0.698	0.509	4.73491e-49	3	EIF3B
1.88211e-53	1.03233	0.707	0.513	4.7781e-49	3	PSMD14
2.12518e-53	1.37124	0.609	0.386	5.3952e-49	3	SPRY2
4.70379e-53	0.63728	0.835	0.763	1.19415e-48	3	EIF3I
7.97481e-53	0.850044	0.761	0.621	2.02456e-48	3	EIF1AXP1
7.43536e-52	1.10009	0.675	0.475	1.88762e-47	3	EBNA1BP2
8.69264e-52	1.29016	0.605	0.387	2.2068e-47	3	NIFK
1.3783e-51	0.577001	0.848	0.779	3.49908e-47	3	FBL
1.4517e-51	1.29738	0.614	0.391	3.68543e-47	3	TCERG1
2.92749e-51	0.569519	0.866	0.815	7.43203e-47	3	SRP72
8.1277e-51	0.696076	0.814	0.714	2.06338e-46	3	ZC3H15
1.01919e-50	0.952891	0.718	0.546	2.58742e-46	3	GRPEL1
1.20201e-50	1.35808	0.573	0.344	3.05153e-46	3	HSP90AA2P
2.23635e-50	0.799502	0.774	0.656	5.67741e-46	3	ILF3
1.05473e-49	0.76181	0.805	0.667	2.67765e-45	3	HK2
1.60908e-49	1.6077	0.464	0.231	4.08496e-45	3	BRIX1
1.95305e-49	0.97306	0.731	0.551	4.95821e-45	3	TMEM158
5.24292e-49	1.31626	0.584	0.374	1.33102e-44	3	PFDN2
5.47516e-49	1.36871	0.57	0.348	1.38998e-44	3	PUM3
5.99825e-49	0.675739	0.857	0.775	1.52278e-44	3	FOXP1
1.95087e-48	1.00339	0.692	0.508	4.95268e-44	3	HSP90AB3P
2.55492e-48	0.996036	0.681	0.504	6.48618e-44	3	TOMM22
4.11666e-48	1.21164	0.633	0.436	1.0451e-43	3	NOP56
4.5866e-48	0.508682	0.87	0.823	1.1644e-43	3	RPL35P5
5.01397e-48	1.22348	0.601	0.391	1.2729e-43	3	MRPL47
6.70618e-48	0.50858	0.863	0.827	1.7025e-43	3	RPS7P1
7.61906e-48	0.763351	0.768	0.658	1.93425e-43	3	PRMT1
1.73919e-47	1.81497	0.388	0.165	4.41528e-43	3	RRP9
2.17254e-47	0.569062	0.833	0.773	5.51543e-43	3	SNRPC
2.64077e-47	0.525711	0.876	0.819	6.70412e-43	3	PTGES3
6.02059e-47	1.19739	0.618	0.405	1.52845e-42	3	KPNA4
6.77333e-47	1.33849	0.583	0.37	1.71954e-42	3	C8orf33
7.98536e-47	1.6413	0.438	0.207	2.02724e-42	3	HMGA2
2.05922e-46	1.33553	0.57	0.351	5.22774e-42	3	TNFRSF10D
3.1032e-46	0.659885	0.863	0.784	7.87809e-42	3	BRD2
5.36228e-46	1.41237	0.532	0.308	1.36132e-41	3	EHD1
1.04545e-45	1.33939	0.577	0.371	2.65408e-41	3	TFAM
1.2793e-45	1.05047	0.688	0.527	3.24776e-41	3	ITPRIP
1.68798e-45	0.614159	0.861	0.803	4.28528e-41	3	SON
2.89483e-45	1.62516	0.462	0.246	7.34912e-41	3	EIF4A1P2
5.60108e-45	0.573805	0.826	0.764	1.42195e-40	3	XRCC6
1.13882e-44	0.889205	0.701	0.557	2.89111e-40	3	HSPA4
1.98603e-44	0.973405	0.679	0.531	5.04194e-40	3	TCP1
2.32804e-44	1.04252	0.653	0.477	5.91019e-40	3	NUP58
2.80288e-44	1.54806	0.471	0.257	7.11568e-40	3	HSPD1P1
3.20896e-44	1.92423	0.336	0.133	8.14658e-40	3	SMN2
8.31907e-44	0.959156	0.672	0.518	2.11196e-39	3	NUDC
3.16731e-43	0.522234	0.863	0.803	8.04084e-39	3	AL161909.1
3.26003e-43	1.20988	0.579	0.373	8.27624e-39	3	GAR1
5.59189e-43	1.93941	0.356	0.155	1.41961e-38	3	NOP2
5.83557e-43	1.40108	0.512	0.296	1.48148e-38	3	DCAF13
6.50294e-43	0.844356	0.712	0.586	1.6509e-38	3	DDX18
1.66136e-42	1.34832	0.549	0.344	4.21769e-38	3	GPRC5A
1.90858e-42	1.09015	0.622	0.435	4.84531e-38	3	EIF2S1
1.12015e-41	0.619392	0.831	0.751	2.84372e-37	3	SF1
2.67017e-41	0.721577	0.757	0.647	6.77876e-37	3	SNRPF
3.22019e-41	0.600534	0.844	0.776	8.17509e-37	3	DDX3X
3.8136e-41	0.614091	0.785	0.698	9.68158e-37	3	NDUFS6
4.43215e-41	0.566094	0.818	0.764	1.12519e-36	3	HNRNPR
8.20229e-41	1.09168	0.631	0.449	2.08232e-36	3	PPP2R2A
1.90564e-40	0.697161	0.79	0.683	4.83786e-36	3	KDM5C
3.18945e-40	0.613425	0.798	0.723	8.09706e-36	3	RAD23B
3.19905e-40	1.1029	0.596	0.406	8.12143e-36	3	DDX52
3.56103e-40	0.879452	0.681	0.548	9.04039e-36	3	STRAP
3.86563e-40	1.33952	0.525	0.336	9.81368e-36	3	TIMM50
4.30778e-40	1.16821	0.592	0.388	1.09362e-35	3	SLC4A7
5.68088e-40	0.542572	0.827	0.753	1.4422e-35	3	TRMT112
1.3612e-39	0.523572	0.833	0.771	3.45568e-35	3	SNRPG
2.01706e-39	2.03791	0.295	0.115	5.12071e-35	3	AP000919.1
2.27115e-39	1.38679	0.516	0.319	5.76578e-35	3	GNPDA1
3.85545e-39	0.926887	0.664	0.508	9.78783e-35	3	DHX9
3.95422e-39	1.28795	0.538	0.328	1.00386e-34	3	TES
4.38623e-39	0.98978	0.633	0.461	1.11353e-34	3	HNRNPAB
5.0589e-39	0.80827	0.709	0.567	1.2843e-34	3	PSMD11
8.9318e-39	0.679802	0.764	0.672	2.26752e-34	3	EIF6
1.92089e-38	0.606284	0.807	0.714	4.87657e-34	3	MGLL
2.19911e-38	1.41233	0.492	0.292	5.58289e-34	3	NIP7
2.26248e-38	0.586097	0.87	0.805	5.74377e-34	3	LIF
3.10292e-38	1.0974	0.601	0.419	7.87738e-34	3	DCP1A
4.83981e-38	0.5574	0.801	0.739	1.22868e-33	3	PSMA3
5.9531e-38	0.701798	0.744	0.644	1.51131e-33	3	WDR45B
7.56773e-38	1.8964	0.299	0.119	1.92122e-33	3	RRP12
9.21607e-38	1.34062	0.51	0.318	2.33968e-33	3	RRP15
9.23016e-38	1.24275	0.532	0.339	2.34326e-33	3	C1QBP
1.24047e-37	1.34581	0.492	0.294	3.14919e-33	3	EIF4E
1.81282e-37	0.695475	0.755	0.65	4.60221e-33	3	TOP1
2.07999e-37	0.700391	0.738	0.631	5.28046e-33	3	DAZAP1
2.88719e-37	1.29757	0.51	0.319	7.32971e-33	3	FARSB
3.78992e-37	0.855788	0.685	0.543	9.62146e-33	3	AHSA1
3.92184e-37	0.794914	0.701	0.605	9.95638e-33	3	CCDC59
6.75686e-37	0.536778	0.816	0.777	1.71536e-32	3	PAPOLA
7.85906e-37	0.538185	0.824	0.766	1.99518e-32	3	RSL24D1
1.6372e-36	0.585881	0.788	0.74	4.15637e-32	3	RBM8A
2.85761e-36	1.16412	0.566	0.395	7.25462e-32	3	HSPBP1
3.00199e-36	1.43541	0.451	0.253	7.62115e-32	3	LSG1
4.89355e-36	0.555602	0.779	0.724	1.24233e-31	3	POLR2L
1.61954e-35	1.65184	0.36	0.171	4.11152e-31	3	BOP1
1.73032e-35	0.596287	0.77	0.703	4.39277e-31	3	NDUFB9
3.22908e-35	1.91696	0.321	0.142	8.19766e-31	3	TRAF1
3.90145e-35	0.811465	0.705	0.591	9.9046e-31	3	CDV3
5.86725e-35	1.58496	0.399	0.207	1.48952e-30	3	CCDC137
7.94333e-35	1.13277	0.553	0.377	2.01657e-30	3	LRRC59
9.76269e-35	1.06444	0.573	0.41	2.47845e-30	3	RUVBL1
1.09828e-34	0.5445	0.787	0.753	2.78821e-30	3	PRPF40A
1.659e-34	0.884659	0.649	0.494	4.2117e-30	3	MTHFD2
1.83881e-34	0.893392	0.655	0.53	4.66819e-30	3	KARS
2.22977e-34	1.04468	0.594	0.428	5.66071e-30	3	GLRX3
2.55368e-34	0.753992	0.768	0.667	6.48304e-30	3	TNFAIP8
4.1642e-34	0.551445	0.801	0.747	1.05716e-29	3	PSMD8
2.18808e-33	0.970396	0.627	0.47	5.55487e-29	3	PPIF
2.22969e-33	0.793932	0.69	0.599	5.66052e-29	3	NAA50
2.5235e-33	1.62257	0.343	0.162	6.40641e-29	3	PGAM5
2.57683e-33	1.52676	0.367	0.18	6.5418e-29	3	SMG5
3.93765e-33	0.871962	0.662	0.53	9.9965e-29	3	PSMD12
5.54398e-33	0.624867	0.764	0.709	1.40745e-28	3	NOTCH2
1.09915e-32	0.604324	0.772	0.688	2.79041e-28	3	PSMD2
1.26919e-32	1.45954	0.423	0.236	3.2221e-28	3	NOL11
2.10215e-32	0.889603	0.635	0.506	5.33672e-28	3	MRPL3
2.45969e-32	1.11433	0.532	0.362	6.24443e-28	3	CMSS1
3.42461e-32	1.26771	0.579	0.403	8.69406e-28	3	CSF3
4.06691e-32	1.62145	0.36	0.182	1.03247e-27	3	YRDC
5.08257e-32	1.62207	0.356	0.181	1.29031e-27	3	CLUH
7.16095e-32	0.553972	0.777	0.709	1.81795e-27	3	RPL7P9
7.91571e-32	0.826367	0.675	0.561	2.00956e-27	3	RNPS1
8.47136e-32	1.70171	0.328	0.156	2.15062e-27	3	ZNF697
1.28697e-31	0.835523	0.642	0.513	3.26723e-27	3	MRPS10
2.00214e-31	1.72725	0.323	0.153	5.08282e-27	3	SRFBP1
2.46532e-31	0.882202	0.633	0.493	6.2587e-27	3	SF3A3
3.79506e-31	0.925438	0.612	0.475	9.63451e-27	3	HSPE1P3
4.09881e-31	0.804677	0.655	0.537	1.04056e-26	3	SNRPE
5.0287e-31	1.02681	0.568	0.42	1.27664e-26	3	LSM7
6.21359e-31	1.07509	0.544	0.377	1.57744e-26	3	FMNL2
7.08197e-31	0.910835	0.627	0.493	1.7979e-26	3	PUF60
1.33378e-30	1.52644	0.382	0.209	3.38607e-26	3	RPIA
1.67599e-30	0.606898	0.742	0.68	4.25483e-26	3	MYO1B
1.98634e-30	0.890217	0.636	0.482	5.04272e-26	3	MSC
2.07026e-30	1.37753	0.419	0.241	5.25576e-26	3	NAA15
2.29564e-30	0.710305	0.701	0.609	5.82793e-26	3	ACIN1
2.39922e-30	1.42488	0.401	0.222	6.09091e-26	3	GRWD1
2.77626e-30	1.33896	0.429	0.249	7.04808e-26	3	TRMT6
2.80337e-30	1.03583	0.57	0.428	7.11693e-26	3	NPM1P39
2.9245e-30	0.80548	0.66	0.552	7.42442e-26	3	SRPRB
3.42626e-30	0.614695	0.768	0.672	8.69825e-26	3	SRPRA
3.65805e-30	0.528457	0.77	0.724	9.28668e-26	3	ATP5G1
4.18694e-30	0.823817	0.655	0.548	1.06294e-25	3	ETF1
4.36241e-30	1.73274	0.304	0.141	1.10749e-25	3	SINHCAF
4.71731e-30	1.4152	0.393	0.217	1.19758e-25	3	RBM28
8.62384e-30	0.779979	0.662	0.555	2.18933e-25	3	TIMM17A
1.25095e-29	0.908647	0.609	0.484	3.17578e-25	3	NCBP2
1.71172e-29	0.705931	0.672	0.599	4.34554e-25	3	CYC1
1.98559e-29	1.63595	0.338	0.171	5.04082e-25	3	GJC1
2.46631e-29	0.521374	0.768	0.726	6.26123e-25	3	CDC37
3.31296e-29	0.662946	0.718	0.637	8.41061e-25	3	ATP1B3
4.20153e-29	1.04803	0.558	0.416	1.06664e-24	3	TMEM33
5.6483e-29	0.696906	0.701	0.616	1.43393e-24	3	ILF2
1.36822e-28	0.90142	0.596	0.467	3.47349e-24	3	PRKDC
1.6975e-28	0.515036	0.766	0.733	4.30945e-24	3	PDAP1
2.0486e-28	0.515387	0.772	0.735	5.20077e-24	3	PABPN1
2.31201e-28	0.811613	0.644	0.532	5.86949e-24	3	AC007969.1
2.38108e-28	0.574284	0.744	0.679	6.04486e-24	3	PDLIM4
3.33009e-28	1.6376	0.347	0.184	8.4541e-24	3	SACS
5.87179e-28	1.38226	0.403	0.238	1.49067e-23	3	PAK1IP1
6.80312e-28	1.39463	0.403	0.239	1.72711e-23	3	GNPNAT1
1.25195e-27	1.07945	0.521	0.368	3.17833e-23	3	AATF
1.34494e-27	0.566274	0.746	0.687	3.41441e-23	3	DNAJC8
1.81032e-27	1.71892	0.282	0.128	4.59586e-23	3	MFSD2A
1.81868e-27	1.48698	0.353	0.186	4.61708e-23	3	SESN2
2.11171e-27	0.770409	0.646	0.523	5.36101e-23	3	TMX2
2.24402e-27	0.793137	0.651	0.544	5.69689e-23	3	MIR4435-2HG
2.44371e-27	0.581061	0.737	0.68	6.20384e-23	3	RPS7P11
2.79256e-27	0.615334	0.735	0.652	7.08947e-23	3	ANKRD11
3.56003e-27	0.685749	0.709	0.621	9.03784e-23	3	ATP13A3
5.23814e-27	0.5673	0.761	0.71	1.32981e-22	3	CELF1
5.45776e-27	0.655229	0.699	0.626	1.38556e-22	3	RAD23A
5.93427e-27	1.29033	0.427	0.267	1.50653e-22	3	GNL2
7.27504e-27	1.66999	0.325	0.17	1.84691e-22	3	RRS1
7.35735e-27	0.721985	0.664	0.559	1.86781e-22	3	AC007182.2
7.44214e-27	1.46954	0.336	0.172	1.88934e-22	3	REXO4
7.60973e-27	0.831197	0.612	0.496	1.93188e-22	3	PSMD3
8.8454e-27	0.557328	0.755	0.698	2.24558e-22	3	PSMD1
1.05869e-26	0.525438	0.796	0.764	2.68768e-22	3	FGF2
2.16111e-26	1.51165	0.341	0.182	5.4864e-22	3	PDCD11
2.65637e-26	0.950351	0.573	0.452	6.74372e-22	3	DNTTIP2
2.83076e-26	0.892216	0.583	0.455	7.18645e-22	3	PSMD6
3.81564e-26	0.519166	0.761	0.718	9.68675e-22	3	KIRREL1
4.35018e-26	1.12221	0.499	0.349	1.10438e-21	3	RAE1
4.57576e-26	0.700553	0.67	0.59	1.16165e-21	3	GNL3
5.71343e-26	1.41571	0.36	0.198	1.45047e-21	3	WDR3
6.16865e-26	1.01823	0.503	0.339	1.56604e-21	3	TWISTNB
6.24733e-26	1.53488	0.31	0.153	1.58601e-21	3	RBM19
6.47561e-26	0.587296	0.707	0.631	1.64396e-21	3	HDAC2
8.37479e-26	0.53719	0.779	0.742	2.12611e-21	3	CNBP
9.23518e-26	0.911046	0.571	0.447	2.34454e-21	3	SF3B4
1.07005e-25	1.11721	0.501	0.348	2.71653e-21	3	BAZ1A
1.57282e-25	0.594461	0.738	0.668	3.99293e-21	3	EWSR1
1.64463e-25	0.955038	0.538	0.393	4.17521e-21	3	CPSF2
1.71229e-25	1.74363	0.308	0.156	4.34698e-21	3	SNHG15
1.96444e-25	0.704631	0.647	0.555	4.98713e-21	3	AUP1
2.09227e-25	0.816526	0.614	0.519	5.31165e-21	3	PSMC4
3.0263e-25	0.653512	0.698	0.626	7.68288e-21	3	CHIC2
3.50992e-25	0.532215	0.735	0.681	8.91063e-21	3	SNRPD3
4.15248e-25	1.12702	0.481	0.335	1.05419e-20	3	IMP4
4.73504e-25	1.21388	0.419	0.259	1.20208e-20	3	METTL2B
5.52268e-25	1.1668	0.443	0.285	1.40204e-20	3	TCOF1
1.44489e-24	1.39297	0.362	0.206	3.66815e-20	3	STK40
2.24825e-24	0.947779	0.549	0.405	5.70763e-20	3	DDX46
2.46301e-24	1.30793	0.401	0.247	6.25283e-20	3	DNAJC2
3.25509e-24	1.02064	0.499	0.36	8.26369e-20	3	AL445189.2
4.23299e-24	0.63161	0.698	0.625	1.07463e-19	3	SLC16A1
4.32681e-24	1.16836	0.447	0.29	1.09845e-19	3	GMEB1
4.34211e-24	1.43922	0.365	0.213	1.10233e-19	3	EXOSC5
5.27367e-24	1.08903	0.481	0.338	1.33883e-19	3	NAT10
7.37982e-24	1.17953	0.453	0.305	1.87352e-19	3	KLHL21
1.04823e-23	1.46623	0.332	0.181	2.66114e-19	3	FBXO45
1.05705e-23	0.65717	0.69	0.636	2.68353e-19	3	RBM25
2.97667e-23	0.508616	0.766	0.708	7.55687e-19	3	GOLGA4
2.98803e-23	0.551467	0.742	0.697	7.58572e-19	3	BRD4
3.03365e-23	0.945527	0.545	0.409	7.70152e-19	3	SQSTM1
3.08528e-23	0.857285	0.571	0.454	7.83259e-19	3	YBX1P1
3.18513e-23	0.612411	0.673	0.603	8.08609e-19	3	PPP2CA
3.98102e-23	0.686934	0.64	0.551	1.01066e-18	3	RARS
4.18406e-23	1.23546	0.416	0.27	1.06221e-18	3	SURF6
5.75284e-23	0.867173	0.564	0.447	1.46047e-18	3	STOML2
9.03169e-23	0.636823	0.659	0.607	2.29287e-18	3	SNRPEP4
1.05371e-22	1.23081	0.412	0.264	2.67506e-18	3	SRGAP1
1.46206e-22	1.10818	0.455	0.312	3.71173e-18	3	NOC3L
2.22065e-22	1.33077	0.336	0.186	5.63758e-18	3	TRMT1
3.39629e-22	0.705183	0.629	0.555	8.62216e-18	3	PTPN11
3.46549e-22	0.569887	0.727	0.664	8.79784e-18	3	BTG3
3.54053e-22	0.735341	0.657	0.569	8.98833e-18	3	ATP6V1B2
4.21138e-22	0.65817	0.655	0.571	1.06914e-17	3	SNW1
4.62089e-22	0.657678	0.646	0.575	1.1731e-17	3	ABCF1
5.09703e-22	0.683774	0.651	0.579	1.29398e-17	3	LARS
6.34357e-22	1.05773	0.456	0.318	1.61044e-17	3	PRPF19
6.38925e-22	0.684288	0.633	0.536	1.62204e-17	3	RPL7P1
7.36419e-22	0.755997	0.597	0.497	1.86955e-17	3	YARS
7.60149e-22	1.11717	0.456	0.311	1.92979e-17	3	DDX39A
9.74634e-22	1.0822	0.451	0.309	2.4743e-17	3	LONP1
1.23279e-21	0.983629	0.481	0.343	3.12969e-17	3	ABCF2
1.44385e-21	0.691496	0.69	0.625	3.66549e-17	3	DSE
1.53375e-21	0.83646	0.571	0.458	3.89374e-17	3	ESF1
1.85074e-21	0.65618	0.644	0.569	4.69847e-17	3	LAPTM4B
2.21914e-21	0.677693	0.657	0.583	5.63374e-17	3	GLS
2.51786e-21	0.967238	0.508	0.38	6.39209e-17	3	RFLNB
2.6603e-21	0.88047	0.555	0.432	6.75371e-17	3	HIVEP2
5.26009e-21	1.0035	0.488	0.36	1.33538e-16	3	PES1
5.38112e-21	0.691562	0.633	0.552	1.36611e-16	3	SUPT16H
6.06953e-21	1.21796	0.351	0.204	1.54087e-16	3	SLIT2
6.31889e-21	1.42461	0.288	0.151	1.60418e-16	3	SLC25A22
7.33921e-21	0.649861	0.633	0.568	1.8632e-16	3	CORO1C
8.82259e-21	0.87812	0.568	0.459	2.23979e-16	3	BAG3
8.8328e-21	0.554988	0.703	0.645	2.24238e-16	3	LSM14A
9.30306e-21	0.992521	0.499	0.377	2.36177e-16	3	LRPPRC
1.22477e-20	0.628307	0.664	0.599	3.10934e-16	3	NARS
1.23995e-20	0.684665	0.64	0.552	3.14787e-16	3	IPO5
1.34028e-20	0.766299	0.581	0.486	3.40257e-16	3	CDC123
1.73275e-20	0.705055	0.62	0.523	4.39893e-16	3	SF3A1
1.97445e-20	1.35208	0.321	0.179	5.01254e-16	3	ZNF562
2.28485e-20	1.35653	0.345	0.208	5.80055e-16	3	TSR1
3.05555e-20	1.47404	0.278	0.145	7.75712e-16	3	NOL6
3.56631e-20	0.574723	0.677	0.605	9.05378e-16	3	DHX36
3.76844e-20	0.95554	0.499	0.377	9.56695e-16	3	TRIO
3.79488e-20	1.30779	0.328	0.186	9.63407e-16	3	ERN1
5.64916e-20	0.732612	0.622	0.531	1.43415e-15	3	DDX6
6.16937e-20	0.904828	0.518	0.411	1.56622e-15	3	ALG3
9.4088e-20	0.976092	0.503	0.38	2.38861e-15	3	TXNRD1
9.8749e-20	0.50247	0.751	0.709	2.50694e-15	3	XBP1
1.00985e-19	0.831376	0.553	0.445	2.56371e-15	3	DDX27
1.87869e-19	0.793371	0.555	0.456	4.76944e-15	3	DAP3
1.94505e-19	0.886658	0.519	0.411	4.93789e-15	3	ATIC
1.97039e-19	1.16186	0.397	0.261	5.00223e-15	3	MET
3.06307e-19	1.33441	0.319	0.185	7.77623e-15	3	NOP14
3.40726e-19	1.31284	0.323	0.186	8.65002e-15	3	NUDCD1
3.63556e-19	1.36283	0.334	0.2	9.2296e-15	3	LTV1
3.69599e-19	0.756284	0.575	0.499	9.38301e-15	3	MAGOH
3.89851e-19	0.685279	0.583	0.5	9.89715e-15	3	DENR
4.084e-19	0.914171	0.512	0.409	1.03681e-14	3	POLE3
4.10913e-19	1.00049	0.468	0.344	1.04319e-14	3	TOMM34
4.57289e-19	0.51166	0.716	0.68	1.16092e-14	3	EIF3D
4.93509e-19	0.632882	0.612	0.545	1.25287e-14	3	IMPDH2
7.01976e-19	1.2518	0.328	0.194	1.78211e-14	3	XPO5
7.21232e-19	0.522024	0.688	0.65	1.83099e-14	3	GSPT1
8.57283e-19	0.72334	0.577	0.478	2.17638e-14	3	SNRPGP10
9.30462e-19	0.662232	0.601	0.529	2.36216e-14	3	NDUFAF2
1.03583e-18	1.39361	0.295	0.167	2.62966e-14	3	SLC16A2
1.09332e-18	0.768025	0.551	0.435	2.77561e-14	3	SMC1A
1.28836e-18	1.06607	0.436	0.316	3.27075e-14	3	WDR75
1.32427e-18	0.705245	0.588	0.486	3.36191e-14	3	PPP4R3B
1.81836e-18	0.681381	0.618	0.541	4.61627e-14	3	SLTM
1.83939e-18	1.1196	0.412	0.289	4.66965e-14	3	GART
2.10092e-18	0.609744	0.659	0.605	5.3336e-14	3	NSRP1
2.25364e-18	0.65312	0.623	0.566	5.72133e-14	3	COA4
2.59982e-18	0.747186	0.553	0.45	6.60015e-14	3	CACYBP
2.63198e-18	0.706611	0.583	0.485	6.68181e-14	3	IRAK1
2.63288e-18	0.807801	0.538	0.44	6.68408e-14	3	PURB
3.09567e-18	0.768789	0.562	0.474	7.85897e-14	3	PRPF38B
3.22923e-18	0.633194	0.629	0.539	8.19806e-14	3	PSMC3
4.12301e-18	1.01757	0.451	0.336	1.04671e-13	3	MRPL1
4.52577e-18	0.523812	0.694	0.648	1.14896e-13	3	ZFP91
4.56005e-18	1.3655	0.273	0.148	1.15766e-13	3	NOL9
4.6428e-18	0.55439	0.673	0.614	1.17867e-13	3	THOC2
6.61526e-18	0.873344	0.505	0.398	1.67941e-13	3	GATAD2A
6.90236e-18	0.97043	0.443	0.326	1.7523e-13	3	TMEM11
7.39715e-18	0.988069	0.442	0.324	1.87791e-13	3	RPP30
1.27519e-17	0.581193	0.664	0.579	3.23733e-13	3	TRA2B
1.31055e-17	0.710168	0.581	0.458	3.3271e-13	3	GEM
1.51156e-17	0.841134	0.506	0.4	3.83741e-13	3	SRRT
1.76439e-17	1.08217	0.406	0.284	4.47926e-13	3	NGDN
2.91179e-17	0.965217	0.455	0.33	7.39217e-13	3	MTHFD2L
3.13681e-17	0.873768	0.49	0.379	7.96341e-13	3	PSMD7
5.14152e-17	0.964108	0.44	0.316	1.30528e-12	3	RLF
6.65003e-17	1.04122	0.458	0.342	1.68824e-12	3	SNHG1
9.66691e-17	0.846679	0.497	0.392	2.45414e-12	3	PTCD3
1.22338e-16	1.13405	0.317	0.191	3.10579e-12	3	NABP1
1.22896e-16	1.32185	0.263	0.144	3.11996e-12	3	MAK16
1.31267e-16	0.805086	0.529	0.435	3.33247e-12	3	NOB1
1.58669e-16	0.653028	0.633	0.573	4.02812e-12	3	SLC11A2
1.89707e-16	0.518684	0.657	0.611	4.81609e-12	3	PSMB3
1.90193e-16	1.4686	0.254	0.139	4.82842e-12	3	EXOSC2
2.50883e-16	1.46283	0.26	0.144	6.36915e-12	3	BYSL
2.64394e-16	1.06441	0.399	0.276	6.71218e-12	3	CHD1
2.79041e-16	0.515214	0.696	0.655	7.08401e-12	3	ZFR
3.12734e-16	0.817206	0.512	0.419	7.93938e-12	3	FARSA
3.62603e-16	1.446	0.256	0.141	9.20541e-12	3	NOM1
3.93091e-16	0.552485	0.666	0.608	9.9794e-12	3	SERP1
4.09272e-16	0.680608	0.583	0.51	1.03902e-11	3	ABHD2
4.47206e-16	0.831877	0.494	0.393	1.13532e-11	3	MRPL42
4.48011e-16	0.723329	0.547	0.459	1.13736e-11	3	ALYREF
5.12095e-16	1.08074	0.397	0.283	1.30006e-11	3	NSUN2
5.91412e-16	0.919851	0.462	0.35	1.50142e-11	3	AMD1
8.5906e-16	0.723939	0.54	0.445	2.1809e-11	3	DNAJB6
9.26509e-16	1.01935	0.41	0.288	2.35213e-11	3	OTUD4
9.97018e-16	0.666416	0.583	0.513	2.53113e-11	3	WBP11
1.0244e-15	1.06921	0.391	0.276	2.60064e-11	3	RRP7A
1.04385e-15	0.76367	0.527	0.443	2.65003e-11	3	ECHDC1
1.0859e-15	0.511824	0.798	0.81	2.75677e-11	3	CCL20
1.77119e-15	0.914747	0.447	0.334	4.49651e-11	3	IFRD1
1.80799e-15	0.988284	0.423	0.313	4.58995e-11	3	ZNF787
1.91092e-15	0.531134	0.664	0.614	4.85125e-11	3	PRPF8
1.99836e-15	0.872137	0.469	0.374	5.07323e-11	3	SNRPEP2
2.07668e-15	0.661214	0.564	0.484	5.27208e-11	3	MAPRE1
2.35352e-15	0.813119	0.497	0.409	5.97489e-11	3	CCDC124
2.93414e-15	0.61144	0.579	0.517	7.44889e-11	3	SNRPGP2
3.11604e-15	1.31202	0.269	0.155	7.91069e-11	3	DIEXF
3.22396e-15	0.94556	0.434	0.326	8.18468e-11	3	DYNC1LI1
3.52827e-15	0.550448	0.657	0.629	8.95722e-11	3	WDR82
3.66654e-15	0.661366	0.592	0.524	9.30826e-11	3	DHX15
4.19001e-15	0.803073	0.49	0.399	1.06372e-10	3	RBM8B
4.31968e-15	0.591949	0.614	0.549	1.09664e-10	3	TMEM87A
5.76208e-15	1.19145	0.312	0.197	1.46282e-10	3	DHX33
5.77632e-15	1.226	0.319	0.205	1.46643e-10	3	CCDC58
5.90079e-15	1.38381	0.265	0.153	1.49803e-10	3	PINX1
6.03631e-15	1.04461	0.395	0.282	1.53244e-10	3	MRPS35
6.14349e-15	0.621876	0.59	0.524	1.55965e-10	3	RBM22
6.54529e-15	1.20398	0.302	0.186	1.66165e-10	3	WDR36
6.81182e-15	0.836555	0.49	0.391	1.72932e-10	3	YES1
6.96021e-15	0.661268	0.566	0.503	1.76699e-10	3	PITPNB
7.08639e-15	0.703049	0.545	0.463	1.79902e-10	3	ZNF281
1.17912e-14	1.08182	0.365	0.253	2.99344e-10	3	SRPK1
1.47299e-14	0.883519	0.462	0.37	3.73947e-10	3	SAFB
1.50422e-14	0.800814	0.508	0.418	3.81877e-10	3	PPTC7
2.4585e-14	0.892813	0.451	0.348	6.24139e-10	3	PARL
2.67381e-14	0.878158	0.458	0.361	6.78801e-10	3	SRA1
2.7691e-14	0.902755	0.438	0.33	7.02992e-10	3	BMS1
3.2335e-14	0.675885	0.592	0.525	8.20888e-10	3	IRF1
3.31273e-14	0.657879	0.583	0.522	8.41003e-10	3	BCL2A1
4.83426e-14	0.640733	0.566	0.507	1.22727e-09	3	PSMC1P1
6.1071e-14	0.884434	0.456	0.36	1.55041e-09	3	GPR176
6.1978e-14	1.01703	0.356	0.244	1.57344e-09	3	DDX56
6.56288e-14	1.02979	0.36	0.251	1.66612e-09	3	SCO1
6.82709e-14	0.897005	0.408	0.3	1.73319e-09	3	SKIV2L2
7.0566e-14	0.536473	0.627	0.577	1.79146e-09	3	AAMP
7.19375e-14	0.522332	0.633	0.581	1.82628e-09	3	YKT6
7.39954e-14	1.19796	0.314	0.205	1.87852e-09	3	MRPL9
7.65533e-14	1.16916	0.301	0.188	1.94346e-09	3	MFHAS1
8.69731e-14	1.23613	0.291	0.185	2.20798e-09	3	HSPE1P2
9.03143e-14	0.986554	0.397	0.291	2.29281e-09	3	CTNNBL1
9.98515e-14	0.644657	0.551	0.487	2.53493e-09	3	POLD2
1.40287e-13	0.827628	0.471	0.38	3.56145e-09	3	LPXN
1.48549e-13	1.18693	0.295	0.186	3.77122e-09	3	MDN1
1.52738e-13	0.534786	0.67	0.634	3.87756e-09	3	ARL8B
1.7225e-13	0.855943	0.438	0.346	4.37292e-09	3	EMG1
1.93986e-13	1.09291	0.315	0.205	4.92474e-09	3	AHCTF1
1.9966e-13	1.01133	0.393	0.297	5.06878e-09	3	MT1A
2.21066e-13	0.947478	0.404	0.302	5.61221e-09	3	RRN3
2.23234e-13	0.665552	0.577	0.523	5.66724e-09	3	PNPLA8
2.46779e-13	0.867597	0.471	0.386	6.26499e-09	3	SAFB2
2.965e-13	0.834722	0.46	0.38	7.52725e-09	3	EFTUD2
3.1017e-13	0.879693	0.417	0.319	7.87428e-09	3	NPM3
3.30419e-13	0.892939	0.427	0.329	8.38835e-09	3	ZC3H18
3.40211e-13	1.12849	0.321	0.219	8.63693e-09	3	SERBP1P1
3.82742e-13	0.934244	0.39	0.284	9.71666e-09	3	RFK
4.06002e-13	0.503225	0.633	0.605	1.03072e-08	3	MRPS18B
4.53935e-13	0.814035	0.449	0.357	1.1524e-08	3	EIF3M
4.63623e-13	0.641747	0.544	0.502	1.177e-08	3	PSME3
4.877e-13	0.609248	0.579	0.533	1.23812e-08	3	CNOT9
5.06495e-13	0.562812	0.625	0.558	1.28584e-08	3	NFKB1
6.393e-13	0.640288	0.544	0.486	1.62299e-08	3	PSMC6
7.26987e-13	1.05874	0.315	0.208	1.8456e-08	3	NUP205
7.78447e-13	0.693134	0.525	0.45	1.97624e-08	3	SRP68
8.96674e-13	0.775883	0.468	0.38	2.27639e-08	3	TMA16
9.59657e-13	0.911379	0.39	0.285	2.43628e-08	3	NCLN
1.0575e-12	0.800087	0.468	0.391	2.68467e-08	3	DFFA
1.13906e-12	0.607093	0.568	0.513	2.89172e-08	3	PPP2CB
1.43811e-12	1.03822	0.319	0.216	3.65092e-08	3	AL109618.1
1.46062e-12	1.00637	0.334	0.231	3.70808e-08	3	PHB
1.94792e-12	0.966583	0.345	0.239	4.94517e-08	3	NUP88
2.1113e-12	0.879444	0.425	0.33	5.35996e-08	3	TSR2
2.23028e-12	0.891671	0.41	0.322	5.66201e-08	3	KRR1
2.41407e-12	0.764827	0.497	0.436	6.1286e-08	3	PNN
2.53891e-12	0.895875	0.412	0.318	6.44554e-08	3	CEBPZ
2.63172e-12	1.20817	0.256	0.157	6.68116e-08	3	PUS7
2.63984e-12	1.01863	0.397	0.303	6.70176e-08	3	FAM129A
3.44574e-12	0.666277	0.536	0.487	8.7477e-08	3	TIPRL
3.99254e-12	0.739258	0.484	0.418	1.01359e-07	3	FAM168B
4.16368e-12	1.0978	0.319	0.218	1.05703e-07	3	TP53BP2
4.3965e-12	0.664693	0.505	0.43	1.11614e-07	3	SLC7A1
4.6906e-12	1.14846	0.312	0.213	1.1908e-07	3	LAS1L
5.13065e-12	1.28129	0.271	0.174	1.30252e-07	3	CAPN15
5.37939e-12	1.06196	0.321	0.22	1.36567e-07	3	CEBPG
5.96866e-12	0.815672	0.44	0.345	1.51526e-07	3	MTA2
6.00197e-12	1.02339	0.315	0.213	1.52372e-07	3	POLR3A
6.54029e-12	0.558045	0.588	0.545	1.66038e-07	3	EIF4A3
6.8875e-12	1.27299	0.252	0.157	1.74853e-07	3	PRMT3
1.0613e-11	1.01234	0.301	0.194	2.69431e-07	3	DOT1L
1.07402e-11	0.815768	0.41	0.311	2.72661e-07	3	FASN
1.18009e-11	0.571943	0.596	0.55	2.99589e-07	3	RBBP6
1.40346e-11	0.666603	0.506	0.436	3.56297e-07	3	MAP1B
1.41665e-11	1.08641	0.308	0.211	3.59646e-07	3	ADRM1
1.45454e-11	0.998379	0.356	0.264	3.69265e-07	3	MRPS30
1.59213e-11	0.921987	0.31	0.202	4.04193e-07	3	TRIB1
1.59287e-11	1.0138	0.306	0.208	4.04383e-07	3	AGPAT5
1.61944e-11	1.0624	0.312	0.214	4.11128e-07	3	METTL16
1.7229e-11	0.707185	0.468	0.387	4.37392e-07	3	TPRKB
2.02218e-11	1.0203	0.336	0.247	5.13371e-07	3	SERBP1P5
2.09113e-11	0.572192	0.594	0.548	5.30876e-07	3	TNFRSF10B
2.52936e-11	1.05238	0.295	0.197	6.4213e-07	3	RPAP1
2.77325e-11	1.06221	0.267	0.169	7.04044e-07	3	CAD
2.83053e-11	0.676811	0.503	0.427	7.18586e-07	3	SSSCA1
2.87141e-11	0.827865	0.425	0.34	7.28965e-07	3	STK4
4.02789e-11	0.738243	0.451	0.371	1.02256e-06	3	SMG1
4.07697e-11	0.562196	0.564	0.522	1.03502e-06	3	RTRAF
4.24754e-11	0.933404	0.375	0.287	1.07832e-06	3	TTLL12
4.39107e-11	0.578693	0.571	0.537	1.11476e-06	3	PLEKHB2
4.48171e-11	1.09351	0.302	0.207	1.13777e-06	3	DUSP16
4.63109e-11	0.808823	0.41	0.318	1.17569e-06	3	PHF14
4.65459e-11	0.506751	0.581	0.541	1.18166e-06	3	EIF2S2P4
4.84195e-11	0.720632	0.488	0.416	1.22923e-06	3	PPP4R2
4.8689e-11	0.528079	0.571	0.531	1.23607e-06	3	RBM17
5.02313e-11	0.656876	0.512	0.438	1.27522e-06	3	BUD23
5.02871e-11	0.547901	0.588	0.557	1.27664e-06	3	RPS6KA3
5.32035e-11	1.02134	0.353	0.267	1.35068e-06	3	NDUFAF4
6.67436e-11	0.638571	0.512	0.458	1.69442e-06	3	PHAX
6.68169e-11	1.03906	0.299	0.205	1.69628e-06	3	NPM1P6
6.99781e-11	0.666989	0.54	0.484	1.77653e-06	3	MAFG
7.01683e-11	1.07111	0.317	0.226	1.78136e-06	3	CCT8P1
7.31601e-11	0.593597	0.519	0.451	1.85732e-06	3	CWC27
7.92176e-11	0.845638	0.399	0.317	2.0111e-06	3	WDR18
8.06218e-11	0.97959	0.371	0.291	2.04675e-06	3	SART3
9.39009e-11	1.16722	0.256	0.162	2.38386e-06	3	KITLG
9.61664e-11	0.750391	0.469	0.411	2.44138e-06	3	PLRG1
1.04126e-10	0.772694	0.419	0.33	2.64345e-06	3	JMJD6
1.04577e-10	0.977732	0.323	0.229	2.65489e-06	3	LETM1
1.06328e-10	0.543843	0.579	0.541	2.69934e-06	3	DRAM1
1.0922e-10	0.536289	0.566	0.526	2.77276e-06	3	SDHB
1.42717e-10	0.782649	0.377	0.28	3.62315e-06	3	MRPL39
1.42954e-10	0.566143	0.575	0.536	3.62917e-06	3	ZC3H13
1.45709e-10	0.50844	0.623	0.599	3.69913e-06	3	RYBP
1.56898e-10	0.832632	0.406	0.332	3.98318e-06	3	NELFCD
1.57084e-10	1.09977	0.254	0.162	3.98789e-06	3	METTL2A
1.5916e-10	0.99322	0.338	0.248	4.04059e-06	3	GTF2H1
1.61486e-10	0.555057	0.558	0.521	4.09965e-06	3	GTF2F2
1.9223e-10	1.15189	0.267	0.178	4.88014e-06	3	FAM208B
1.93817e-10	0.774416	0.416	0.337	4.92044e-06	3	RPA2
2.10992e-10	0.739392	0.473	0.414	5.35645e-06	3	MRPL32
2.14415e-10	0.733159	0.427	0.348	5.44336e-06	3	MPHOSPH6
2.15022e-10	0.982408	0.347	0.265	5.45877e-06	3	GATC
2.17754e-10	0.715284	0.469	0.394	5.52811e-06	3	SPHK1
2.21275e-10	0.777073	0.406	0.32	5.61751e-06	3	FAM98B
2.485e-10	0.805163	0.404	0.322	6.30866e-06	3	TBRG4
2.61938e-10	0.922638	0.34	0.25	6.64981e-06	3	SMG7
2.62327e-10	0.502894	0.596	0.572	6.65971e-06	3	PAK2
2.65111e-10	0.926488	0.332	0.237	6.73038e-06	3	OTUD7B
2.72914e-10	0.78949	0.399	0.31	6.92846e-06	3	POLE4
2.88962e-10	0.788505	0.438	0.374	7.33589e-06	3	POLR3D
3.00891e-10	0.589722	0.512	0.468	7.63873e-06	3	SRM
3.07324e-10	1.07268	0.275	0.184	7.80202e-06	3	EXOSC3
3.36912e-10	1.08803	0.269	0.179	8.55319e-06	3	DUSP12
3.65381e-10	0.570552	0.564	0.523	9.27593e-06	3	MAP2K3
4.18184e-10	0.806783	0.406	0.323	1.06164e-05	3	CWC22
4.44549e-10	0.631131	0.488	0.427	1.12858e-05	3	ARPC5L
5.06046e-10	0.910067	0.317	0.224	1.2847e-05	3	GOLGA8A
5.46785e-10	1.04271	0.284	0.195	1.38812e-05	3	SEH1L
5.82152e-10	1.14734	0.252	0.164	1.47791e-05	3	PM20D2
6.56824e-10	0.981829	0.299	0.208	1.66748e-05	3	COX19
7.69982e-10	1.16587	0.254	0.17	1.95475e-05	3	HNRNPUP1
9.64518e-10	0.580486	0.523	0.464	2.44862e-05	3	SDAD1
9.93395e-10	0.517033	0.575	0.546	2.52193e-05	3	PSMA5
1.06035e-09	0.82475	0.38	0.294	2.69191e-05	3	NUP50
1.09734e-09	0.594897	0.534	0.478	2.78581e-05	3	CHTOP
1.18126e-09	0.81616	0.401	0.315	2.99887e-05	3	CLCF1
1.21429e-09	0.884956	0.347	0.261	3.08271e-05	3	IPMK
1.37675e-09	0.692736	0.46	0.4	3.49516e-05	3	XPOT
1.40485e-09	0.848308	0.38	0.299	3.5665e-05	3	NUP153
1.53224e-09	0.74369	0.429	0.367	3.8899e-05	3	BZW2
1.62446e-09	0.632774	0.464	0.4	4.12401e-05	3	RANBP1
2.04973e-09	0.562859	0.534	0.483	5.20365e-05	3	RNMT
2.0513e-09	0.588588	0.527	0.491	5.20764e-05	3	SF3B3
2.07274e-09	0.694355	0.481	0.424	5.26206e-05	3	HCFC1
2.1217e-09	0.618777	0.501	0.453	5.38637e-05	3	LRRFIP2
2.1466e-09	0.559084	0.529	0.477	5.44958e-05	3	SMC3
2.42629e-09	0.607831	0.503	0.44	6.15962e-05	3	ANKRD17
2.70948e-09	0.773261	0.406	0.343	6.87857e-05	3	SNRPA1
2.97865e-09	0.932465	0.312	0.228	7.56191e-05	3	NHP2
3.38567e-09	0.644329	0.46	0.396	8.5952e-05	3	MPHOSPH10
3.83483e-09	0.760002	0.414	0.339	9.73548e-05	3	CSK
3.97558e-09	0.692597	0.456	0.395	0.000100928	3	MED1
4.26791e-09	0.763406	0.371	0.29	0.000108349	3	PPP1R14C
4.9165e-09	0.98641	0.299	0.215	0.000124815	3	SART1
5.86698e-09	1.0014	0.256	0.173	0.000148945	3	NSUN5
5.88486e-09	0.967049	0.276	0.193	0.000149399	3	ECSIT
6.17619e-09	0.767859	0.39	0.312	0.000156795	3	FOXK1
7.17501e-09	0.515328	0.544	0.511	0.000182152	3	DCBLD2
7.22291e-09	0.508069	0.532	0.482	0.000183368	3	SRSF1
7.90621e-09	0.950558	0.317	0.24	0.000200715	3	MRPL58
8.17235e-09	0.735615	0.406	0.337	0.000207471	3	CHCHD3
8.48382e-09	0.953622	0.282	0.198	0.000215379	3	SPOUT1
9.25977e-09	1.04699	0.288	0.21	0.000235078	3	MARS
9.69638e-09	0.868954	0.353	0.276	0.000246162	3	PRPS1
9.79802e-09	0.553968	0.547	0.52	0.000248742	3	RABGGTB
1.07576e-08	0.602515	0.479	0.424	0.000273103	3	SPCS2P4
1.12112e-08	0.706421	0.447	0.389	0.000284618	3	GCN1
1.29432e-08	1.03521	0.271	0.191	0.000328588	3	RANP1
1.33373e-08	0.519991	0.525	0.479	0.000338594	3	SNRNP200
1.37483e-08	0.917275	0.301	0.219	0.000349028	3	WDR12
1.53755e-08	0.933293	0.299	0.22	0.000390339	3	AL035458.1
1.81872e-08	0.843945	0.375	0.307	0.000461717	3	AKIRIN2
1.88302e-08	0.620428	0.49	0.429	0.000478041	3	CREB5
1.88483e-08	0.692262	0.39	0.313	0.000478501	3	CRKL
2.05404e-08	0.736721	0.395	0.324	0.000521458	3	IARS
2.07251e-08	0.946074	0.282	0.202	0.000526149	3	C12orf45
2.36306e-08	1.01248	0.262	0.184	0.00059991	3	PNP
2.39178e-08	0.825676	0.354	0.277	0.000607202	3	PPP4R3A
2.43645e-08	0.721562	0.43	0.376	0.00061854	3	RSBN1
2.44183e-08	0.520584	0.51	0.457	0.000619907	3	CCND2
2.88427e-08	0.791786	0.362	0.286	0.000732229	3	PPP1R8
2.96579e-08	0.651089	0.401	0.322	0.000752926	3	SLC20A1
3.03356e-08	0.52519	0.536	0.502	0.000770131	3	TRIM44
3.57664e-08	0.628013	0.46	0.397	0.000908002	3	ETS2
4.08676e-08	0.805548	0.347	0.269	0.00103751	3	IL7R
4.2486e-08	0.7063	0.438	0.368	0.00107859	3	HAS2
4.26522e-08	0.638998	0.462	0.406	0.00108281	3	EXOSC6
4.26746e-08	0.746936	0.406	0.348	0.00108338	3	MIEF1
4.63223e-08	0.56181	0.501	0.458	0.00117598	3	SMARCC1
6.24656e-08	0.545498	0.49	0.435	0.00158581	3	SRP19
6.53508e-08	0.819814	0.341	0.269	0.00165906	3	DCUN1D5
6.71748e-08	0.988282	0.291	0.217	0.00170537	3	RBM14
6.90575e-08	0.724228	0.391	0.322	0.00175316	3	TERF2
7.5992e-08	0.680402	0.395	0.323	0.00192921	3	RBM10
7.96181e-08	0.735313	0.384	0.321	0.00202126	3	LLPH
8.13304e-08	0.785938	0.364	0.289	0.00206474	3	WWC2
8.50339e-08	0.619855	0.481	0.444	0.00215876	3	FAF2
9.86151e-08	0.848724	0.328	0.253	0.00250354	3	PPP1R15B
1.00152e-07	0.77235	0.362	0.283	0.00254256	3	DDX54
1.1826e-07	0.83629	0.323	0.25	0.00300227	3	SMPD4
1.2423e-07	0.918459	0.273	0.197	0.00315383	3	ELL
1.25329e-07	1.00709	0.262	0.188	0.00318172	3	SNIP1
1.57042e-07	0.582912	0.49	0.458	0.00398682	3	MRPS15
1.70805e-07	0.74019	0.341	0.269	0.00433623	3	RRAS2
1.8744e-07	1.01222	0.262	0.19	0.00475854	3	ABRAXAS2
1.8746e-07	0.57443	0.477	0.441	0.00475905	3	PFDN6
1.92255e-07	0.597668	0.486	0.443	0.00488078	3	YTHDC1
1.97885e-07	0.615451	0.443	0.387	0.0050237	3	CHRAC1
2.00399e-07	0.714333	0.401	0.341	0.00508752	3	NUS1
2.04566e-07	0.544906	0.466	0.413	0.00519331	3	VASP
2.07242e-07	0.534827	0.495	0.454	0.00526126	3	HNRNPA1P48
2.09295e-07	0.837126	0.323	0.251	0.00531336	3	ZCCHC3
2.34811e-07	0.631583	0.447	0.4	0.00596114	3	SNHG3
2.4664e-07	0.736934	0.351	0.286	0.00626145	3	STX6
2.56174e-07	0.832288	0.33	0.26	0.0065035	3	SEC23IP
2.61306e-07	0.530981	0.473	0.426	0.00663378	3	GOSR1
2.99079e-07	1.09168	0.254	0.186	0.00759272	3	ABTB2
3.13242e-07	0.819376	0.325	0.257	0.00795228	3	MRRF
3.16019e-07	0.614047	0.451	0.402	0.00802277	3	MDM2
3.24627e-07	0.858334	0.338	0.271	0.0082413	3	MED6
3.25147e-07	0.912351	0.308	0.241	0.00825451	3	TATDN1
3.30352e-07	0.700837	0.382	0.318	0.00838663	3	CSE1L
3.32221e-07	0.555985	0.484	0.453	0.00843409	3	TYW3
3.54795e-07	0.708065	0.406	0.363	0.00900719	3	PEF1
3.6138e-07	0.67774	0.395	0.331	0.00917436	3	JHDM1D-AS1
3.61656e-07	0.676521	0.395	0.333	0.00918137	3	VTA1
3.70994e-07	0.732756	0.371	0.315	0.00941842	3	PDCD2
3.7574e-07	0.791434	0.317	0.248	0.00953892	3	PRPF3
3.86093e-07	0.61357	0.416	0.356	0.00980175	3	ELOA
4.30805e-07	0.65529	0.438	0.395	0.0109368	3	RIF1
4.52703e-07	0.500684	0.494	0.451	0.0114928	3	IWS1
4.53468e-07	0.506392	0.505	0.483	0.0115122	3	PRKAR2A
5.08867e-07	0.747698	0.353	0.29	0.0129186	3	TIMM21
6.25817e-07	0.653088	0.408	0.353	0.0158876	3	TBRG1
6.44123e-07	0.714707	0.382	0.322	0.0163524	3	DPP9
6.48553e-07	0.610647	0.412	0.351	0.0164648	3	TRMT112P6
6.91147e-07	0.82171	0.321	0.257	0.0175461	3	DNAJC7
6.97082e-07	0.591871	0.464	0.437	0.0176968	3	FAM204A
7.11852e-07	0.805528	0.341	0.28	0.0180718	3	ETNK1
7.56427e-07	0.538835	0.488	0.454	0.0192034	3	FCF1
8.10155e-07	0.638188	0.421	0.377	0.0205674	3	SBNO1
8.7664e-07	0.85023	0.289	0.222	0.0222553	3	CDK11B
9.89487e-07	0.716782	0.367	0.307	0.0251201	3	PLPBP
1.07153e-06	0.812587	0.321	0.258	0.027203	3	SMARCD1
1.0759e-06	0.75991	0.388	0.335	0.0273139	3	IER5
1.09018e-06	0.627736	0.41	0.357	0.0276765	3	MTF1
1.13509e-06	0.923722	0.306	0.246	0.0288166	3	NELFA
1.17762e-06	0.769541	0.356	0.3	0.0298964	3	LIN7C
1.17768e-06	0.951983	0.25	0.184	0.0298977	3	HAUS2
1.19006e-06	0.694528	0.341	0.278	0.030212	3	INTS13
1.19702e-06	0.565049	0.458	0.413	0.0303887	3	ZNF146
1.23494e-06	0.647462	0.41	0.357	0.0313514	3	CDK12
1.23926e-06	0.74921	0.391	0.347	0.0314611	3	LUC7L
1.33589e-06	0.541104	0.449	0.392	0.0339143	3	AGFG1
1.35045e-06	0.802043	0.295	0.23	0.0342839	3	DNTTIP1
1.42271e-06	0.805831	0.315	0.258	0.0361184	3	HNRNPA3P6
1.46399e-06	0.891788	0.297	0.234	0.0371664	3	AL596087.1
1.64405e-06	0.751571	0.334	0.275	0.0417374	3	PANK3
1.69838e-06	0.652813	0.388	0.332	0.0431168	3	CTR9
1.71245e-06	0.725122	0.347	0.284	0.0434739	3	KRAS
1.77855e-06	0.79059	0.291	0.226	0.045152	3	POLR3K
1.78082e-06	0.598229	0.43	0.39	0.0452098	3	MRPS27
2.22043e-06	0.892346	0.269	0.205	0.05637	3	AAGAB
2.34188e-06	0.566544	0.479	0.44	0.0594533	3	CSRNP1
2.40535e-06	0.723152	0.34	0.275	0.0610646	3	FAM210A
2.49601e-06	0.684899	0.371	0.315	0.0633662	3	FTSJ3
2.54753e-06	0.68084	0.375	0.332	0.064674	3	ERCC1
2.58265e-06	0.525797	0.475	0.445	0.0655656	3	ZNF706
2.62599e-06	0.532269	0.477	0.446	0.0666661	3	RUVBL2
3.04057e-06	0.600769	0.417	0.374	0.0771911	3	RBM26
3.05868e-06	0.786638	0.291	0.227	0.0776506	3	RABGEF1
3.09145e-06	0.678395	0.384	0.335	0.0784826	3	PSME4
3.31238e-06	0.597382	0.414	0.37	0.0840914	3	MAPK6
3.40811e-06	0.526177	0.46	0.427	0.0865218	3	PFDN1
3.53421e-06	0.642438	0.404	0.355	0.0897231	3	ASNA1
3.57815e-06	0.59754	0.416	0.37	0.0908385	3	FAM57A
3.81815e-06	0.804171	0.312	0.253	0.0969313	3	DNAAF5
3.8678e-06	0.822697	0.293	0.233	0.0981918	3	ZCCHC10
4.11869e-06	0.76488	0.345	0.289	0.104561	3	MED27
4.19326e-06	0.678638	0.378	0.329	0.106454	3	AKIRIN1
4.24932e-06	0.519203	0.44	0.388	0.107878	3	SLC6A8
4.25636e-06	0.609405	0.41	0.364	0.108056	3	RBM42
4.41734e-06	0.542193	0.477	0.464	0.112143	3	CHMP1A
4.58643e-06	0.855278	0.286	0.226	0.116436	3	EXOSC9
4.90047e-06	0.931038	0.25	0.191	0.124408	3	NOL10
5.19752e-06	0.578593	0.421	0.377	0.13195	3	RNF220
5.36196e-06	0.749678	0.341	0.289	0.136124	3	PTGES2
5.37923e-06	0.501327	0.479	0.443	0.136563	3	NCOR1
5.71711e-06	0.669035	0.371	0.32	0.14514	3	TMEM183A
5.79904e-06	0.592671	0.436	0.404	0.14722	3	ALG2
6.06662e-06	0.841184	0.284	0.223	0.154013	3	ZBTB43
6.97764e-06	0.64223	0.404	0.361	0.177141	3	SRF
6.98718e-06	0.659462	0.358	0.305	0.177384	3	GLRX2
7.72746e-06	0.665105	0.365	0.316	0.196177	3	ZPR1
7.875e-06	0.866334	0.256	0.196	0.199923	3	WDR46
7.97816e-06	0.873401	0.25	0.19	0.202541	3	MGA
8.1649e-06	0.60217	0.395	0.337	0.207282	3	HIPK2
1.04523e-05	0.812418	0.288	0.231	0.265353	3	VARS
1.12492e-05	0.701821	0.314	0.256	0.285584	3	HBS1L
1.19627e-05	0.63374	0.395	0.348	0.303697	3	DUSP5
1.23785e-05	0.667889	0.386	0.35	0.314253	3	TERF1
1.25362e-05	0.602559	0.404	0.367	0.318255	3	KPNA3
1.28747e-05	0.691988	0.349	0.3	0.32685	3	SERTAD1
1.34096e-05	0.808416	0.301	0.25	0.34043	3	DNAJA3
1.34923e-05	0.656402	0.323	0.264	0.342529	3	SPSB1
1.39283e-05	0.829725	0.263	0.205	0.353598	3	FASTKD2
1.63896e-05	0.592966	0.408	0.367	0.416084	3	MEAF6
1.71523e-05	0.556277	0.438	0.397	0.435446	3	ATF5
1.85321e-05	0.624013	0.386	0.348	0.470474	3	PRPF4
1.90261e-05	0.800239	0.286	0.231	0.483015	3	RCC1L
2.12157e-05	0.773679	0.308	0.261	0.538604	3	MPDU1
2.65186e-05	0.767884	0.262	0.205	0.673227	3	ME2
2.67613e-05	0.771687	0.297	0.243	0.67939	3	ZNF622
3.2243e-05	0.734592	0.282	0.224	0.818554	3	DMAC2
3.3047e-05	0.538619	0.43	0.413	0.838965	3	TWF1
3.50632e-05	0.751711	0.299	0.25	0.890149	3	KHDC4
3.62091e-05	0.732117	0.306	0.254	0.919242	3	EMC8
3.66981e-05	0.503618	0.425	0.388	0.931655	3	SMARCA4
3.75862e-05	0.645239	0.341	0.294	0.954201	3	ARIH2
3.77325e-05	0.784304	0.31	0.265	0.957915	3	E2F4
3.93888e-05	0.741709	0.299	0.247	0.999963	3	ASCC3
4.02462e-05	0.61238	0.384	0.348	1	3	KDM3A
4.45695e-05	0.747022	0.28	0.228	1	3	ABT1
4.46022e-05	0.636085	0.371	0.333	1	3	MED19
5.07187e-05	0.536384	0.395	0.351	1	3	ZBTB21
5.28559e-05	0.766873	0.315	0.269	1	3	JMJD1C
5.44329e-05	0.528257	0.445	0.42	1	3	MAPKAP1
5.61547e-05	0.673386	0.343	0.301	1	3	MED10
5.66241e-05	0.524065	0.44	0.425	1	3	FRG1
5.87394e-05	0.530219	0.412	0.377	1	3	SLAIN2
6.16525e-05	0.555663	0.414	0.383	1	3	WBP4
6.4758e-05	0.740466	0.308	0.262	1	3	NCS1
6.72249e-05	0.624025	0.364	0.322	1	3	MED13
6.9079e-05	0.553648	0.378	0.338	1	3	RICTOR
6.91869e-05	0.572442	0.364	0.324	1	3	KAT6A
6.952e-05	0.751963	0.278	0.226	1	3	TAF2
7.27019e-05	0.507515	0.408	0.372	1	3	MTIF2
7.96525e-05	0.627199	0.321	0.272	1	3	SLC29A1
8.12233e-05	0.633894	0.349	0.308	1	3	SAP30BP
8.83407e-05	0.588021	0.365	0.321	1	3	COPS5
9.09466e-05	0.79027	0.332	0.298	1	3	ANKRD10
9.65019e-05	0.564322	0.416	0.391	1	3	MRPL22
9.76332e-05	0.714041	0.302	0.259	1	3	CCDC43
9.83679e-05	0.835562	0.25	0.199	1	3	MDM4
0.000101734	0.752788	0.284	0.233	1	3	ETV3
0.000103107	0.615991	0.388	0.359	1	3	SMU1
0.000110085	0.521938	0.44	0.424	1	3	TNPO3
0.00011516	0.576826	0.377	0.334	1	3	ATG4B
0.000115345	0.582894	0.358	0.314	1	3	PBDC1
0.000116294	0.511044	0.473	0.472	1	3	GCH1
0.000117181	0.635872	0.288	0.236	1	3	PPWD1
0.000117321	0.691162	0.271	0.218	1	3	ZCCHC2
0.000120541	0.708454	0.321	0.278	1	3	PRPF38A
0.00012073	0.679562	0.325	0.284	1	3	DPAGT1
0.000124035	0.624787	0.349	0.305	1	3	POP7
0.000125274	0.70359	0.265	0.214	1	3	RIOK1
0.000139656	0.672547	0.325	0.28	1	3	ASXL2
0.000144765	0.76291	0.25	0.203	1	3	GTF3C5
0.000145233	0.545205	0.397	0.365	1	3	CREBBP
0.000155769	0.785999	0.252	0.203	1	3	THOP1
0.000168666	0.523244	0.395	0.356	1	3	ELMSAN1
0.000175483	0.559234	0.408	0.381	1	3	PLAGL1
0.000184917	0.684257	0.297	0.252	1	3	MRPS22
0.000187774	0.553461	0.308	0.253	1	3	IGF2BP2
0.000192783	0.615265	0.364	0.331	1	3	OGFOD1
0.000209498	0.72446	0.297	0.253	1	3	COIL
0.000211972	0.71905	0.302	0.262	1	3	DPH3
0.000215886	0.541667	0.404	0.379	1	3	DDX23
0.000221725	0.51334	0.404	0.372	1	3	TFE3
0.000222406	0.576747	0.358	0.32	1	3	PIP5K1A
0.000223792	0.54513	0.382	0.35	1	3	ZNF609
0.00024135	0.541533	0.391	0.365	1	3	ASAP1
0.000260848	0.604344	0.36	0.329	1	3	SGTA
0.000265085	0.514355	0.421	0.411	1	3	MRPS2
0.000283192	0.740251	0.256	0.209	1	3	CCDC93
0.000302427	0.725694	0.254	0.207	1	3	MRPS18C
0.000303435	0.694896	0.284	0.238	1	3	LUCAT1
0.000320962	0.523078	0.364	0.322	1	3	TLE3
0.000351918	0.563455	0.393	0.367	1	3	PGM3
0.000356332	0.549122	0.414	0.387	1	3	NAV2
0.000368444	0.653315	0.328	0.289	1	3	WDR5
0.000374023	0.655791	0.299	0.255	1	3	BRWD1
0.000381469	0.677875	0.302	0.264	1	3	CBWD1
0.000388927	0.777552	0.291	0.259	1	3	LARP4
0.000431423	0.688953	0.31	0.272	1	3	PTGES3P1
0.000471583	0.708482	0.273	0.23	1	3	MTMR9
0.000480312	0.741191	0.262	0.218	1	3	TMEM5
0.00048796	0.74576	0.275	0.236	1	3	AC012065.5
0.000489259	0.525886	0.377	0.347	1	3	MBD3
0.000507295	0.536711	0.365	0.333	1	3	PPIH
0.00053879	0.762097	0.25	0.206	1	3	ATAD2
0.000546133	0.601385	0.334	0.3	1	3	NECAP1
0.000582809	0.514196	0.401	0.383	1	3	SNRPA
0.000593731	0.68371	0.269	0.229	1	3	MTAP
0.000657919	0.718146	0.262	0.221	1	3	FBXO22
0.000664646	0.650836	0.341	0.318	1	3	TRIAP1
0.00066644	0.760339	0.275	0.24	1	3	NHP2P1
0.00068802	0.675274	0.293	0.255	1	3	TAF3
0.000710989	0.771579	0.269	0.234	1	3	TEX10
0.000720657	0.579449	0.353	0.323	1	3	PPP6R3
0.000776844	0.571087	0.378	0.359	1	3	LRRC47
0.000798896	0.729161	0.26	0.219	1	3	NLN
0.000824691	0.555905	0.336	0.3	1	3	WAPL
0.000829713	0.506888	0.375	0.346	1	3	PMPCA
0.000852822	0.642167	0.312	0.28	1	3	RPS7P10
0.000895345	0.536512	0.365	0.339	1	3	MAP4K5
0.000904842	0.682235	0.265	0.226	1	3	BTBD7
0.00090871	0.720588	0.273	0.235	1	3	CDYL
0.000959766	0.609481	0.286	0.244	1	3	IMPDH1
0.000961784	0.609926	0.299	0.26	1	3	MKNK2
0.000975309	0.555085	0.362	0.339	1	3	PPIE
0.00104935	0.738675	0.262	0.226	1	3	RAB11FIP2
0.00105356	0.584858	0.332	0.3	1	3	THUMPD1
0.00106238	0.526026	0.382	0.363	1	3	TIMM10
0.00110777	0.7057	0.256	0.217	1	3	RTTN
0.00115961	0.519981	0.367	0.345	1	3	ISG20L2
0.00117	0.644944	0.312	0.282	1	3	SDCCAG3
0.00134305	0.6984	0.269	0.234	1	3	C20orf27
0.00134946	0.646159	0.319	0.294	1	3	COQ10B
0.00136043	0.553645	0.369	0.35	1	3	DIMT1
0.00143511	0.712212	0.267	0.233	1	3	ZNF330
0.00145415	0.634764	0.308	0.277	1	3	FAM216A
0.00147999	0.701134	0.263	0.228	1	3	SLC30A7
0.00148349	0.599144	0.33	0.299	1	3	COPS3
0.00156621	0.617942	0.302	0.273	1	3	KIN
0.00167209	0.510898	0.34	0.31	1	3	ZCCHC9
0.00177649	0.651447	0.269	0.235	1	3	AL445433.1
0.00178793	0.531131	0.336	0.312	1	3	CENPX
0.00185776	0.514322	0.354	0.331	1	3	ZNF271P
0.00191042	0.644025	0.262	0.226	1	3	FBRSL1
0.0019754	0.614558	0.262	0.223	1	3	ITGA2
0.00202435	0.54683	0.364	0.347	1	3	TMEM39A
0.00213614	0.508307	0.312	0.277	1	3	TMEM126A
0.00213772	0.518527	0.349	0.323	1	3	SYMPK
0.00229266	0.729926	0.25	0.215	1	3	HCCS
0.00235708	0.540029	0.347	0.323	1	3	BMI1
0.00248915	0.540386	0.33	0.3	1	3	ADPRHL2
0.00249318	0.664199	0.262	0.227	1	3	RPP14
0.00251153	0.54529	0.328	0.294	1	3	MCM7
0.00260366	0.715409	0.263	0.227	1	3	ZNF267
0.00274506	0.642737	0.291	0.261	1	3	MRPL12
0.00308083	0.563547	0.336	0.319	1	3	MRPL11
0.00310864	0.554013	0.332	0.31	1	3	DIS3
0.00329894	0.62893	0.282	0.253	1	3	AL359918.1
0.00349688	0.514754	0.397	0.394	1	3	FNBP4
0.00388612	0.648158	0.289	0.266	1	3	KXD1
0.00391021	0.557892	0.28	0.245	1	3	CHST11
0.0039138	0.580652	0.258	0.22	1	3	MRPL46
0.00394316	0.635453	0.26	0.226	1	3	PARD3
0.00421657	0.685799	0.267	0.24	1	3	AC113935.1
0.00425321	0.565839	0.323	0.301	1	3	CCDC82
0.00434282	0.601283	0.302	0.276	1	3	AK6
0.00452109	0.598959	0.297	0.271	1	3	EXOSC7
0.00469461	0.681494	0.256	0.227	1	3	DDI2
0.0048801	0.59659	0.306	0.281	1	3	PAX8-AS1
0.00520484	0.587299	0.262	0.232	1	3	PEX14
0.00526695	0.582211	0.295	0.27	1	3	AL354714.2
0.00569619	0.65403	0.262	0.231	1	3	DANCR
0.00607705	0.506692	0.334	0.312	1	3	PANX1
0.0063131	0.599843	0.263	0.232	1	3	LTN1
0.00682342	0.576998	0.25	0.223	1	3	PPID
0.00715548	0.560472	0.314	0.293	1	3	CTTNBP2NL
0.00763542	0.584038	0.325	0.312	1	3	CDK7
0.00764386	0.550537	0.301	0.278	1	3	CTCF
0.0079736	0.514925	0.325	0.305	1	3	ZNF37A
0.00816836	0.574994	0.288	0.266	1	3	HSD17B10
0.00827018	0.524209	0.295	0.266	1	3	ZNHIT6
0.00896589	0.587121	0.299	0.278	1	3	NT5C3A
0.00918154	0.517304	0.295	0.27	1	3	DCUN1D1
0.00940907	0.600643	0.267	0.243	1	3	ALAS1
0.00953225	0.601491	0.26	0.231	1	3	BRMS1
0.00976556	0.580879	0.299	0.282	1	3	ZNF644
1.07663e-200	2.41704	0.793	0.241	2.73323e-196	4	OLFM2
4.28073e-179	1.76073	0.926	0.408	1.08675e-174	4	FBLN2
1.2887e-164	0.519634	1	0.993	3.27161e-160	4	COL1A1
5.35733e-159	0.553454	1	0.976	1.36007e-154	4	SPARC
1.07583e-155	2.10959	0.777	0.285	2.7312e-151	4	MFAP5
3.27945e-147	1.67746	0.883	0.38	8.32554e-143	4	COL14A1
5.45637e-146	1.2159	0.967	0.644	1.38521e-141	4	EFEMP1
1.98297e-145	2.43707	0.632	0.183	5.03416e-141	4	IGFBP2
1.29558e-143	1.49238	0.92	0.5	3.28908e-139	4	CRLF1
3.18704e-139	1.69346	0.849	0.365	8.09094e-135	4	NOTCH3
2.31505e-131	1.27876	0.955	0.562	5.87722e-127	4	COL4A1
1.75562e-124	1.80892	0.726	0.268	4.45699e-120	4	LGALS3BP
1.6973e-119	1.20959	0.926	0.62	4.30893e-115	4	THY1
2.23859e-117	2.19763	0.54	0.146	5.68311e-113	4	LRRC32
2.72943e-115	0.70833	0.996	0.89	6.9292e-111	4	CALD1
3.206e-114	1.13948	0.949	0.63	8.13907e-110	4	CYGB
7.48983e-114	2.22717	0.487	0.12	1.90144e-109	4	CD248
5.71271e-111	1.43565	0.857	0.459	1.45028e-106	4	PAPPA
9.4069e-110	1.79418	0.669	0.235	2.38813e-105	4	HTR2A
1.34039e-109	0.570905	1	0.93	3.40284e-105	4	BGN
4.61614e-109	2.0052	0.581	0.178	1.1719e-104	4	SCG2
2.50836e-107	1.57797	0.787	0.389	6.36798e-103	4	ITGA11
1.4896e-103	0.962421	0.971	0.721	3.78164e-99	4	VCAN
6.98922e-99	0.916543	0.975	0.713	1.77435e-94	4	COL4A2
1.06404e-97	0.677966	0.99	0.868	2.70127e-93	4	IGFBP7
7.18914e-96	1.01926	0.941	0.664	1.82511e-91	4	FGF7
3.37458e-95	0.619278	0.988	0.873	8.56704e-91	4	COL5A1
1.92152e-93	1.76826	0.72	0.352	4.87817e-89	4	SFRP2
2.30331e-92	2.05985	0.476	0.137	5.84741e-88	4	SYTL2
7.1503e-92	1.54768	0.802	0.457	1.81525e-87	4	CTGF
4.22297e-91	1.47406	0.751	0.362	1.07209e-86	4	COL5A3
[truncated: 6,507 more rows]

## Sheet: ST3_DE_Receptors
p_val	avg_log2FC	pct.1	pct.2	p_val_adj	receptor	cell_type
2.31644e-18	7.94104	0.067	0	5.88076e-14	ALK	FC-Regulatory
9.11299e-07	4.88837	0.067	0.002	0.0231351	CSF2RB	FC-Regulatory
1.53158e-06	3.50528	0.267	0.034	0.0388822	PILRA	FC-Regulatory
0.000840448	4.14432	0.067	0.004	1	GIPR	FC-Regulatory
0.00143152	-0.464078	0.867	0.988	1	CD99	FC-Regulatory
0.0028482	3.83791	0.133	0.021	1	ITGA6	FC-Regulatory
0.00314245	3.32277	0.133	0.021	1	SELL	FC-Regulatory
0.00633041	0.300892	1	0.999	1	CD44	FC-Regulatory
0.0072171	3.49032	0.133	0.024	1	ITGA9	FC-Regulatory
0.012932	3.35346	0.133	0.028	1	NTNG2	FC-Regulatory
0.0140705	3.56444	0.067	0.008	1	OXTR	FC-Regulatory
0.0181812	0.586095	0.933	0.725	1	CD47	FC-Regulatory
0.0193521	0.307767	1	0.969	1	LRP1	FC-Regulatory
0.0214108	3.39958	0.067	0.009	1	C5AR1	FC-Regulatory
0.0224545	-3.32463	0	0.265	1	LEPR	FC-Regulatory
0.0343281	0.488331	0.8	0.749	1	NRP2	FC-Regulatory
0.0348196	-1.5257	0.133	0.411	1	NRP1	FC-Regulatory
0.0364956	-0.771473	0.467	0.701	1	PDGFRB	FC-Regulatory
0.038157	-2.97706	0	0.227	1	JAM2	FC-Regulatory
0.0495149	3.25944	0.067	0.011	1	PODXL	FC-Regulatory
0.0621069	-1.31473	0.2	0.435	1	TNFRSF1B	FC-Regulatory
0.0636001	0.496244	0.733	0.699	1	ACKR3	FC-Regulatory
0.0636909	0.687641	0.8	0.753	1	BDKRB2	FC-Regulatory
0.0650687	-0.474011	0.533	0.821	1	IL6ST	FC-Regulatory
0.0722138	0.381009	0.933	0.821	1	OSMR	FC-Regulatory
0.0758821	-2.62993	0	0.176	1	FZD2	FC-Regulatory
0.0845103	1.29092	0.4	0.225	1	PLXNA4	FC-Regulatory
0.088138	0.911278	0.467	0.27	1	PTPRM	FC-Regulatory
0.0898186	1.46092	0.133	0.042	1	CCR1	FC-Regulatory
0.0958846	-0.433014	0.333	0.56	1	PLXNB2	FC-Regulatory
0.0972047	-0.834567	0.267	0.511	1	NOTCH3	FC-Regulatory
0.0982687	0.301213	0.8	0.787	1	AXL	FC-Regulatory
0.106333	-1.0355	0.2	0.41	1	ITGA10	FC-Regulatory
0.113239	-0.536623	0.333	0.559	1	ITGA11	FC-Regulatory
0.11329	2.02619	0.2	0.091	1	IL1RL1	FC-Regulatory
0.130814	-2.28984	0	0.133	1	MCAM	FC-Regulatory
0.134973	1.14884	0.4	0.262	1	IL15RA	FC-Regulatory
0.142192	0.82334	0.533	0.456	1	NEGR1	FC-Regulatory
0.150764	-2.07091	0	0.122	1	IL18R1	FC-Regulatory
0.153284	1.83691	0.133	0.052	1	NPR2	FC-Regulatory
0.15346	-1.27076	0.067	0.225	1	LRP5	FC-Regulatory
0.155322	-0.862606	0.267	0.427	1	IFNGR1	FC-Regulatory
0.156381	2.26153	0.067	0.017	1	CCR7	FC-Regulatory
0.160939	-1.93871	0	0.117	1	TNFRSF14	FC-Regulatory
0.16951	0.451429	0.733	0.673	1	NOTCH2	FC-Regulatory
0.169825	-1.04175	0.133	0.295	1	NECTIN2	FC-Regulatory
0.171788	-1.85418	0	0.111	1	GHR	FC-Regulatory
0.172946	0.898068	0.533	0.422	1	IL10RB	FC-Regulatory
0.190897	0.62902	0.667	0.585	1	IGF2R	FC-Regulatory
0.195634	0.585811	0.6	0.487	1	CD55	FC-Regulatory
0.200018	-1.65311	0	0.099	1	SDC3	FC-Regulatory
0.200405	2.5433	0.067	0.02	1	PLXNA2	FC-Regulatory
0.204859	2.25092	0.067	0.02	1	IL17RB	FC-Regulatory
0.209606	-0.840183	0.133	0.287	1	ADIPOR2	FC-Regulatory
0.211766	1.00639	0.467	0.401	1	ITGB8	FC-Regulatory
0.211836	-0.630659	0.067	0.212	1	CMKLR1	FC-Regulatory
0.218215	-1.57286	0	0.092	1	EDA2R	FC-Regulatory
0.218228	1.68833	0.2	0.111	1	EPHB4	FC-Regulatory
0.221142	-0.557464	0.133	0.314	1	IL4R	FC-Regulatory
0.232981	-1.60586	0	0.087	1	FGFR2	FC-Regulatory
0.238152	0.530753	0.533	0.435	1	ADIPOR1	FC-Regulatory
0.243056	-0.606059	0.067	0.199	1	ITGA2	FC-Regulatory
0.257777	1.11305	0.333	0.23	1	FZD10	FC-Regulatory
0.263695	1.37994	0.133	0.064	1	SDC1	FC-Regulatory
0.265771	-1.24619	0	0.077	1	PVR	FC-Regulatory
0.269008	-1.09906	0.067	0.17	1	CD4	FC-Regulatory
0.274725	-1.20363	0	0.074	1	NECTIN3	FC-Regulatory
0.277708	2.02978	0.067	0.024	1	MPZ	FC-Regulatory
0.280878	-1.36766	0	0.072	1	FZD4	FC-Regulatory
0.284012	-1.27567	0	0.071	1	ITGB3	FC-Regulatory
0.284198	-1.01407	0.067	0.17	1	DAG1	FC-Regulatory
0.287238	2.31872	0.067	0.024	1	GFRA2	FC-Regulatory
0.295862	0.149396	0.933	0.908	1	ITGA5	FC-Regulatory
0.299985	1.04352	0.2	0.116	1	ACVR1B	FC-Regulatory
0.302543	0.276234	0.933	0.91	1	FGFR1	FC-Regulatory
0.303655	-1.38293	0	0.066	1	CD74	FC-Regulatory
0.309009	-0.820074	0.067	0.169	1	LIFR	FC-Regulatory
0.315136	1.82607	0.067	0.025	1	NLGN1	FC-Regulatory
0.327395	-0.319331	0.333	0.511	1	TNFRSF1A	FC-Regulatory
0.332308	-0.95342	0	0.059	1	IL1RL2	FC-Regulatory
0.353094	-0.530375	0.267	0.387	1	ACVR1	FC-Regulatory
0.36003	-0.841629	0	0.053	1	PTCH1	FC-Regulatory
0.362516	1.91328	0.067	0.028	1	MERTK	FC-Regulatory
0.363833	3.01665	0.067	0.029	1	BMPR1B	FC-Regulatory
0.372771	-0.726449	0	0.051	1	IL1RAP	FC-Regulatory
0.377142	-0.768021	0	0.05	1	PECAM1	FC-Regulatory
0.391317	0.67745	0.4	0.32	1	ITGA1	FC-Regulatory
0.427471	-0.27823	0.333	0.47	1	FZD1	FC-Regulatory
0.435733	1.75122	0.2	0.155	1	ADORA2B	FC-Regulatory
0.441839	-0.326738	0.067	0.142	1	LRP6	FC-Regulatory
0.442036	-0.440574	0.133	0.223	1	SV2A	FC-Regulatory
0.44326	-0.161809	0.333	0.457	1	MPZL1	FC-Regulatory
0.448155	-0.481853	0.2	0.29	1	TGFBR1	FC-Regulatory
0.44918	0.207624	0.8	0.708	1	BDKRB1	FC-Regulatory
0.459008	0.130451	0.2	0.295	1	TNFRSF9	FC-Regulatory
0.466506	0.58932	0.067	0.142	1	CD40	FC-Regulatory
0.475225	0.327753	0.067	0.14	1	PLXND1	FC-Regulatory
0.475334	0.446769	0.4	0.335	1	TGFBR2	FC-Regulatory
0.513469	0.185055	0.667	0.652	1	IL13RA1	FC-Regulatory
0.52322	-0.144861	0.667	0.716	1	SDC2	FC-Regulatory
0.531294	1.34591	0.067	0.037	1	DSG2	FC-Regulatory
0.538928	-0.177417	0.2	0.29	1	IL13RA2	FC-Regulatory
0.544104	0.172399	0.867	0.843	1	ITGB5	FC-Regulatory
0.551184	-0.295623	0.267	0.351	1	CD99L2	FC-Regulatory
0.564659	-0.293183	0.133	0.196	1	IL7R	FC-Regulatory
0.570169	-0.127212	0.067	0.118	1	CAP1	FC-Regulatory
0.576506	0.707052	0.267	0.23	1	IL17RC	FC-Regulatory
0.582786	0.25864	0.733	0.614	1	IL1R1	FC-Regulatory
0.587553	-0.270141	0.133	0.196	1	PARD3	FC-Regulatory
0.597031	-0.152334	0.067	0.111	1	CNTNAP1	FC-Regulatory
0.60784	0.316944	0.6	0.618	1	CDH11	FC-Regulatory
0.620608	0.655042	0.067	0.115	1	CADM3	FC-Regulatory
0.62467	0.446452	0.267	0.225	1	MET	FC-Regulatory
0.625754	1.02505	0.133	0.104	1	BMPR1A	FC-Regulatory
0.634934	0.161686	0.4	0.326	1	JAM3	FC-Regulatory
0.667774	0.599189	0.333	0.307	1	PLXNA3	FC-Regulatory
0.680435	0.40071	0.4	0.361	1	CADM1	FC-Regulatory
0.699033	0.491527	0.2	0.169	1	PLXNA1	FC-Regulatory
0.709892	0.381172	0.533	0.548	1	LTBR	FC-Regulatory
0.719247	0.716765	0.067	0.101	1	TNFRSF10A	FC-Regulatory
0.722977	0.893868	0.067	0.047	1	IL3RA	FC-Regulatory
0.729365	0.772059	0.067	0.1	1	IFNAR2	FC-Regulatory
0.740912	1.35049	0.067	0.051	1	TLR4	FC-Regulatory
0.747498	0.192213	0.067	0.093	1	EPOR	FC-Regulatory
0.748359	-0.217396	0.667	0.922	1	NCL	FC-Regulatory
0.76216	-0.144196	0.667	0.854	1	IFNGR2	FC-Regulatory
0.765442	0.117447	0.4	0.539	1	ITGAV	FC-Regulatory
0.790477	0.15554	0.667	0.651	1	IFNAR1	FC-Regulatory
0.803045	0.497948	0.133	0.178	1	JAG1	FC-Regulatory
0.83983	0.944262	0.133	0.123	1	NPR3	FC-Regulatory
0.847932	1.07909	0.067	0.086	1	IL6R	FC-Regulatory
0.882156	1.36931	0.067	0.061	1	FLT1	FC-Regulatory
0.882471	0.298358	0.2	0.193	1	ALCAM	FC-Regulatory
0.891023	0.739886	0.067	0.059	1	AGTR1	FC-Regulatory
0.896255	0.132631	0.6	0.773	1	VCAM1	FC-Regulatory
0.905305	0.43042	0.067	0.076	1	CHRNB1	FC-Regulatory
0.919657	1.73008	0.067	0.064	1	CXCR4	FC-Regulatory
0.919742	0.368793	0.133	0.151	1	NECTIN1	FC-Regulatory
0.955174	1.2341	0.067	0.067	1	FZD3	FC-Regulatory
0.956203	0.467438	0.067	0.071	1	PTH1R	FC-Regulatory
0.959104	0.374278	0.133	0.14	1	CD274	FC-Regulatory
0.972385	0.109203	0.133	0.134	1	ITGAE	FC-Regulatory
0.97327	0.115177	0.133	0.139	1	EDNRA	FC-Regulatory
0.977527	0.533539	0.067	0.064	1	ACKR4	FC-Regulatory
0.977665	0.508883	0.067	0.065	1	FZD6	FC-Regulatory
0.981232	0.229592	0.333	0.379	1	INSR	FC-Regulatory
1.61129e-08	2.54036	0.85	0.262	0.000409058	APLNR	Endothelial
1.38101e-05	-5.0775	0.05	0.607	0.350596	SELE	Endothelial
0.000317572	-0.695002	0.8	0.976	1	MCAM	Endothelial
0.000435071	-1.06306	0.55	0.869	1	ACKR3	Endothelial
0.000696986	1.03213	0.9	0.702	1	KDR	Endothelial
0.00173287	-1.23324	0.4	0.726	1	OSMR	Endothelial
0.00241637	-0.815028	0.6	0.857	1	IFNGR2	Endothelial
0.00276513	-1.78822	0.2	0.548	1	F2R	Endothelial
0.0033088	1.09158	0.75	0.452	1	TGFBR1	Endothelial
0.00359029	-2.03658	0.15	0.512	1	NOTCH3	Endothelial
0.00379188	4.02884	0.1	0	1	ITGB2	Endothelial
0.00426476	-0.305712	0.95	1	1	CD99	Endothelial
0.00664997	1.01	0.65	0.452	1	CD55	Endothelial
0.00730519	0.590726	0.95	0.869	1	IL6ST	Endothelial
0.00756758	0.519068	0.95	0.857	1	NRP2	Endothelial
0.00808252	1.95606	0.3	0.083	1	IL6R	Endothelial
0.0106528	-1.13054	0.45	0.679	1	SDC2	Endothelial
0.0108499	-1.3245	0.1	0.452	1	EPHA2	Endothelial
0.0149515	2.28276	0.25	0.071	1	ITGA9	Endothelial
0.0153707	-1.01371	0.35	0.655	1	IFNGR1	Endothelial
0.0167644	2.95654	0.15	0.024	1	DSG2	Endothelial
0.0194673	0.893131	0.75	0.488	1	CALCRL	Endothelial
0.0235029	-1.80212	0.1	0.357	1	TNFRSF4	Endothelial
0.0247157	-3.28789	0	0.214	1	IL18R1	Endothelial
0.0288534	1.92686	0.25	0.083	1	CHRNB1	Endothelial
0.0316243	1.3017	0.45	0.274	1	FZD8	Endothelial
0.0340728	3.37651	0.1	0.012	1	MPZ	Endothelial
0.0347004	-1.11156	0.2	0.488	1	ICAM1	Endothelial
0.0361445	-2.89788	0	0.19	1	FZD10	Endothelial
0.0365493	2.75178	0.1	0.012	1	SSTR2	Endothelial
0.0379043	-0.893307	0.35	0.583	1	PDGFRB	Endothelial
0.0412124	1.429	0.4	0.202	1	IL13RA2	Endothelial
0.0412562	-0.854043	0.25	0.548	1	PVR	Endothelial
0.0428681	3.46377	0.05	0	1	BMPR1B	Endothelial
0.0428681	3.11812	0.05	0	1	CCR7	Endothelial
0.0428681	3.17492	0.05	0	1	IL17RE	Endothelial
0.0428681	3.06482	0.05	0	1	PRLR	Endothelial
0.0428681	3.46377	0.05	0	1	C3AR1	Endothelial
0.0428681	3.29312	0.05	0	1	OPRD1	Endothelial
0.0428681	3.31456	0.05	0	1	MCHR1	Endothelial
0.0428681	4.4262	0.05	0	1	NCAM2	Endothelial
0.0428681	3.73379	0.05	0	1	NTNG2	Endothelial
0.0468891	1.65268	0.2	0.06	1	NPR1	Endothelial
0.0477223	2.08706	0.15	0.036	1	SMO	Endothelial
0.0496492	-0.832078	0.35	0.583	1	EGFR	Endothelial
0.0524457	-2.78912	0	0.167	1	TNFRSF9	Endothelial
0.0530386	-0.577463	0.6	0.774	1	MPZL1	Endothelial
0.0565795	-1.18831	0.15	0.381	1	ALCAM	Endothelial
0.0610924	-1.31315	0.15	0.357	1	PTPRF	Endothelial
0.0613071	0.681776	0.7	0.536	1	IL4R	Endothelial
0.0630205	-2.82951	0	0.155	1	PARD3	Endothelial
0.0678217	-0.72908	0.4	0.679	1	CD34	Endothelial
0.0704251	0.556477	0.85	0.75	1	JAG1	Endothelial
0.0761324	1.00454	0.45	0.25	1	ITGAE	Endothelial
0.0780684	0.485356	0.8	0.667	1	IL13RA1	Endothelial
0.0795986	-0.730143	0.4	0.583	1	TNFRSF1A	Endothelial
0.0805481	1.14199	0.4	0.25	1	ACVR1	Endothelial
0.0835819	-0.609073	0.55	0.762	1	IFNAR1	Endothelial
0.0839551	-0.224182	0.9	0.94	1	ITGA5	Endothelial
0.0870361	-1.56349	0.1	0.274	1	FAS	Endothelial
0.0879857	-0.632848	0.3	0.548	1	F2RL3	Endothelial
0.0906065	-0.975353	0.3	0.464	1	IL1R1	Endothelial
0.0955621	-0.808955	0.05	0.226	1	EDNRA	Endothelial
0.096106	-2.02124	0.05	0.202	1	IL7R	Endothelial
0.097745	0.508265	0.65	0.405	1	CD99L2	Endothelial
0.106339	-0.357389	0.75	0.881	1	ESAM	Endothelial
0.108105	-2.10306	0.1	0.25	1	IL1RL1	Endothelial
0.108619	-2.20122	0	0.119	1	LIFR	Endothelial
0.112396	0.709718	0.6	0.452	1	TNFRSF1B	Endothelial
0.114217	-1.007	0.25	0.405	1	F11R	Endothelial
0.120887	-0.742019	0.2	0.417	1	ITGA11	Endothelial
0.121821	1.85117	0.1	0.024	1	EDNRB	Endothelial
0.128988	-0.433958	0.7	0.845	1	CDH5	Endothelial
0.130094	-2.71244	0	0.107	1	KIT	Endothelial
0.132678	0.787876	0.5	0.345	1	NEGR1	Endothelial
0.134047	-0.522687	0.55	0.726	1	GLG1	Endothelial
0.140056	1.3389	0.2	0.083	1	ACVR2B	Endothelial
0.146734	1.31021	0.25	0.119	1	PLXNA4	Endothelial
0.155859	-2.00541	0	0.095	1	IL27RA	Endothelial
0.167318	0.586654	0.7	0.536	1	TNFRSF11B	Endothelial
0.168444	-0.802511	0.2	0.369	1	NTRK2	Endothelial
0.169283	1.78745	0.15	0.06	1	SORT1	Endothelial
0.178469	1.55167	0.2	0.095	1	NECTIN1	Endothelial
0.181018	-0.392196	0.5	0.643	1	VCAM1	Endothelial
0.200143	0.630512	0.6	0.524	1	ADIPOR1	Endothelial
0.200873	-1.49478	0.05	0.155	1	IFNAR2	Endothelial
0.201644	-0.671916	0.35	0.476	1	IL3RA	Endothelial
0.207657	1.90542	0.15	0.071	1	SDC1	Endothelial
0.214326	1.37614	0.2	0.107	1	LRP6	Endothelial
0.21672	0.33672	0.9	0.833	1	BMPR2	Endothelial
0.216885	1.90511	0.1	0.036	1	FGFR3	Endothelial
0.219018	1.34716	0.3	0.179	1	TEK	Endothelial
0.222868	-0.699546	0.25	0.381	1	TNFRSF14	Endothelial
0.224582	-1.50529	0	0.071	1	CADM3	Endothelial
0.225281	2.3457	0.1	0.036	1	GFRA2	Endothelial
0.225603	-0.458576	0.45	0.631	1	TNFRSF12A	Endothelial
0.234838	-0.518532	0.2	0.321	1	ITGA6	Endothelial
0.237387	0.455151	0.7	0.655	1	JAM3	Endothelial
0.240514	-1.02296	0.2	0.298	1	PTPRM	Endothelial
0.242764	0.968413	0.1	0.036	1	ERBB2	Endothelial
0.249618	-0.477009	0.15	0.298	1	JAM2	Endothelial
0.252443	-1.36601	0.1	0.202	1	IGF1R	Endothelial
0.253758	1.19951	0.2	0.107	1	FZD7	Endothelial
0.267235	2.90283	0.05	0.012	1	EPHA4	Endothelial
0.270742	-1.35891	0	0.06	1	L1CAM	Endothelial
0.279531	-0.153502	0.4	0.571	1	LTBR	Endothelial
0.282473	1.63549	0.05	0.012	1	GIPR	Endothelial
0.282473	1.95522	0.05	0.012	1	ADORA1	Endothelial
0.282473	1.31819	0.05	0.012	1	SELL	Endothelial
0.298045	0.537164	0.6	0.488	1	ITGA2	Endothelial
0.310853	0.950923	0.25	0.155	1	LRP5	Endothelial
0.31396	-0.418527	0.25	0.381	1	IL10RB	Endothelial
0.318283	-0.354853	0.4	0.56	1	PLXNB2	Endothelial
0.325236	0.546375	0.4	0.286	1	FLT4	Endothelial
0.32639	0.328227	0.8	0.798	1	PODXL	Endothelial
0.327445	-0.311743	0.65	0.798	1	LRP1	Endothelial
0.328074	-0.402007	0.45	0.607	1	CXCR4	Endothelial
0.32894	-0.408125	0.15	0.274	1	CAP1	Endothelial
0.336274	0.425993	0.5	0.381	1	NOTCH4	Endothelial
0.342572	1.87011	0.1	0.048	1	PTH1R	Endothelial
0.353066	-1.10808	0.1	0.179	1	CD274	Endothelial
0.383892	0.923868	0.15	0.083	1	EDA2R	Endothelial
0.400277	0.485949	0.2	0.119	1	SV2A	Endothelial
0.406425	0.825831	0.2	0.131	1	CADM1	Endothelial
0.429561	-0.214492	0.5	0.75	1	PDGFRA	Endothelial
0.430838	-0.47834	0.1	0.179	1	FZD2	Endothelial
0.435987	-0.20376	0.65	0.821	1	NRP1	Endothelial
0.438319	0.270845	0.65	0.655	1	AXL	Endothelial
0.470166	-1.00914	0.1	0.155	1	NRCAM	Endothelial
0.486753	0.306791	0.25	0.179	1	IL17RC	Endothelial
0.497694	-0.611734	0.25	0.31	1	PLXNA1	Endothelial
0.522153	1.96023	0.05	0.024	1	CHRNA5	Endothelial
0.524678	1.02423	0.1	0.06	1	PLXNB1	Endothelial
0.525713	0.47215	0.3	0.238	1	ITGA10	Endothelial
0.534448	0.282644	0.8	0.702	1	ITGAV	Endothelial
0.537224	-0.467485	0.3	0.357	1	CDH11	Endothelial
0.538572	-0.107753	0.55	0.679	1	ACVRL1	Endothelial
0.548077	0.738511	0.25	0.202	1	ITGB8	Endothelial
0.5598	0.8095	0.05	0.024	1	ACVR2A	Endothelial
0.5598	1.24708	0.05	0.024	1	MERTK	Endothelial
0.5598	0.601666	0.05	0.024	1	EPHB3	Endothelial
0.570991	0.796909	0.05	0.095	1	NECTIN3	Endothelial
0.572519	0.502521	0.35	0.31	1	EPHB4	Endothelial
0.580007	-0.776213	0.05	0.083	1	NPR3	Endothelial
0.580007	-0.596249	0.05	0.083	1	TMIGD3	Endothelial
0.582556	0.535585	0.4	0.357	1	CD40	Endothelial
0.603211	0.706854	0.25	0.202	1	DAG1	Endothelial
0.621338	0.448825	0.25	0.214	1	IL15RA	Endothelial
0.628756	-0.59923	0.15	0.19	1	CD74	Endothelial
0.630985	0.484797	0.2	0.155	1	CMKLR1	Endothelial
0.635244	-0.108935	0.6	0.69	1	PLXNA2	Endothelial
0.639997	-0.308431	0.2	0.25	1	PLXNA3	Endothelial
0.652426	0.286107	0.6	0.571	1	IGF2R	Endothelial
0.655403	0.484069	0.05	0.083	1	BMPR1A	Endothelial
0.655585	0.347773	0.15	0.107	1	ITGA3	Endothelial
0.66476	-0.842838	0.25	0.262	1	ADIPOR2	Endothelial
0.680023	-0.132286	0.85	0.964	1	NCL	Endothelial
0.701133	0.593835	0.1	0.071	1	ACKR4	Endothelial
0.711162	-0.144015	0.05	0.071	1	PTCH1	Endothelial
0.743345	-0.480377	0.25	0.274	1	FZD6	Endothelial
0.747595	2.21824	0.05	0.036	1	TYRO3	Endothelial
0.766422	0.795631	0.05	0.036	1	ITGB4	Endothelial
0.785389	0.605478	0.05	0.036	1	IL1R2	Endothelial
0.801642	0.607309	0.1	0.131	1	MET	Endothelial
0.804484	0.564002	0.05	0.036	1	TLR4	Endothelial
0.822106	0.440425	0.5	0.5	1	BDKRB2	Endothelial
0.822725	-0.449708	0.1	0.107	1	ITGB3	Endothelial
0.825442	0.112346	0.3	0.345	1	IL17RA	Endothelial
0.838312	0.295214	0.35	0.345	1	CSF2RB	Endothelial
0.870294	-0.301991	0.05	0.06	1	FZD3	Endothelial
0.871291	0.57427	0.2	0.238	1	SDC3	Endothelial
0.887681	0.234353	0.1	0.119	1	EPOR	Endothelial
0.903741	0.53506	0.1	0.095	1	CNTNAP1	Endothelial
0.909611	0.106983	0.65	0.667	1	PLXND1	Endothelial
0.919357	0.279879	0.15	0.143	1	ACVR1B	Endothelial
0.92974	-0.137608	0.55	0.488	1	ITGA1	Endothelial
0.937632	0.18715	0.25	0.286	1	TNFRSF10A	Endothelial
0.991124	0.334712	0.05	0.048	1	ADORA2B	Endothelial
0.993567	0.200462	0.1	0.095	1	EPHB2	Endothelial
4.43658e-12	1.47351	0.71	0.286	1.12631e-07	CMKLR1	Proliferating_S
6.23109e-12	0.921229	0.914	0.729	1.58189e-07	NRP2	Proliferating_S
4.35838e-09	4.16143	0.204	0.01	0.000110646	ITGB2	Proliferating_S
9.28259e-09	1.10785	0.742	0.411	0.000235657	SDC1	Proliferating_S
3.34392e-08	-1.39597	0.376	0.641	0.00084892	ALCAM	Proliferating_S
8.63345e-07	0.861906	0.849	0.625	0.0219177	TNFRSF11B	Proliferating_S
1.11898e-06	-1.02316	0.441	0.703	0.0284075	NRP1	Proliferating_S
1.19485e-06	2.77184	0.204	0.031	0.0303337	DSG2	Proliferating_S
1.48823e-06	-2.91579	0.022	0.26	0.0377818	MCAM	Proliferating_S
2.36426e-06	-1.24615	0.215	0.542	0.0600216	NOTCH3	Proliferating_S
5.81773e-06	-3.70374	0.022	0.234	0.147695	CLDN11	Proliferating_S
7.32383e-06	0.719769	0.785	0.542	0.18593	FZD8	Proliferating_S
1.10604e-05	1.70119	0.301	0.099	0.280791	TNFRSF10A	Proliferating_S
0.00014351	-3.46167	0.011	0.161	1	GHR	Proliferating_S
0.000265382	-0.459984	0.806	0.901	1	SDC2	Proliferating_S
0.00038878	4.21683	0.065	0	1	C5AR1	Proliferating_S
0.000423038	1.30036	0.344	0.172	1	ITGA6	Proliferating_S
0.000515239	2.63385	0.108	0.016	1	IL17RB	Proliferating_S
0.000754379	-1.43187	0.215	0.385	1	FZD2	Proliferating_S
0.000818418	-1.12006	0.194	0.391	1	PLXND1	Proliferating_S
0.00110275	1.36806	0.237	0.094	1	EPOR	Proliferating_S
0.00119281	-0.57604	0.516	0.703	1	PDGFRB	Proliferating_S
0.00133309	-0.831369	0.452	0.604	1	IL13RA2	Proliferating_S
0.00247375	-0.657668	0.409	0.573	1	ITGA11	Proliferating_S
0.00254844	-0.135808	0.978	0.99	1	ITGB1	Proliferating_S
0.00260561	-0.626159	0.516	0.635	1	IL1R1	Proliferating_S
0.00342039	2.44559	0.075	0.01	1	IL20RA	Proliferating_S
0.0036802	0.835386	0.301	0.141	1	ADORA1	Proliferating_S
0.00427745	-3.70297	0	0.083	1	IL18R1	Proliferating_S
0.00523663	0.390273	0.774	0.646	1	CD99L2	Proliferating_S
0.00683625	-1.91183	0.054	0.167	1	CADM3	Proliferating_S
0.0075417	-0.437188	0.613	0.703	1	MPZL1	Proliferating_S
0.00772443	-1.67915	0.065	0.177	1	ERBB2	Proliferating_S
0.010214	1.81072	0.097	0.026	1	SELL	Proliferating_S
0.0103529	0.277884	0.925	0.797	1	CD47	Proliferating_S
0.0104209	0.179372	0.989	0.953	1	FGFR1	Proliferating_S
0.0104351	-3.28759	0	0.068	1	EPHB1	Proliferating_S
0.0115788	-1.57103	0.075	0.182	1	IL6R	Proliferating_S
0.0119554	-0.484169	0.559	0.635	1	TGFBR2	Proliferating_S
0.0145028	-0.48598	0.57	0.667	1	CDH11	Proliferating_S
0.0145843	0.715289	0.387	0.234	1	CADM1	Proliferating_S
0.0155388	1.31893	0.118	0.042	1	PILRA	Proliferating_S
0.0207264	0.996625	0.258	0.151	1	ITGA3	Proliferating_S
0.0225817	0.181501	0.957	0.932	1	ITGB5	Proliferating_S
0.0242486	-0.948643	0.183	0.292	1	EPHB2	Proliferating_S
0.0247779	-1.87955	0.022	0.094	1	ACVRL1	Proliferating_S
0.0264175	-1.98762	0.032	0.109	1	PTH1R	Proliferating_S
0.0299921	-0.320315	0.699	0.708	1	EGFR	Proliferating_S
0.0300508	0.474664	0.495	0.37	1	ACVR1	Proliferating_S
0.0307267	-0.864035	0.301	0.38	1	PVR	Proliferating_S
0.0337248	-0.350436	0.688	0.76	1	PLXNB2	Proliferating_S
0.0382863	0.705367	0.29	0.182	1	EDA2R	Proliferating_S
0.0390834	-0.188746	0.914	0.906	1	IL6ST	Proliferating_S
0.0421298	-0.261839	0.667	0.745	1	IFNGR2	Proliferating_S
0.04273	-0.172914	0.914	0.917	1	LRP1	Proliferating_S
0.0497547	-0.373576	0.516	0.615	1	FZD1	Proliferating_S
0.0520803	-0.644298	0.301	0.401	1	LRP5	Proliferating_S
0.05304	0.951877	0.247	0.156	1	IL15RA	Proliferating_S
0.0531945	-0.745081	0.28	0.365	1	NTRK2	Proliferating_S
0.0586812	-0.142388	0.462	0.599	1	VCAM1	Proliferating_S
0.0600913	-0.131989	0.978	0.974	1	AXL	Proliferating_S
0.0642162	-0.572062	0.226	0.339	1	JAG1	Proliferating_S
0.067078	0.366396	0.656	0.557	1	NLGN2	Proliferating_S
0.0681224	1.57427	0.054	0.016	1	SSTR2	Proliferating_S
0.0681766	1.05805	0.14	0.073	1	FGFR3	Proliferating_S
0.0703752	0.318043	0.419	0.297	1	MET	Proliferating_S
0.0718406	0.616441	0.269	0.177	1	BMPR1A	Proliferating_S
0.0788992	-1.1562	0.075	0.146	1	TNFRSF9	Proliferating_S
0.0808123	-0.741704	0.129	0.214	1	ICAM1	Proliferating_S
0.0821689	0.396585	0.441	0.339	1	SDC3	Proliferating_S
0.0864456	-0.695732	0.075	0.151	1	F2R	Proliferating_S
0.0885383	-0.120388	0.946	0.953	1	ITGA5	Proliferating_S
0.092297	-1.38777	0.011	0.052	1	GFRA1	Proliferating_S
0.0943385	-0.797491	0.086	0.161	1	ITGB3	Proliferating_S
0.102161	0.161415	0.914	0.875	1	SDC4	Proliferating_S
0.105514	0.378933	0.516	0.401	1	ITGA1	Proliferating_S
0.114096	-1.03118	0.086	0.151	1	EDNRA	Proliferating_S
0.115873	0.176956	0.667	0.51	1	BDKRB2	Proliferating_S
0.132398	-1.12827	0.065	0.12	1	EPHB3	Proliferating_S
0.142422	0.36096	0.452	0.359	1	TNFRSF1B	Proliferating_S
0.142755	-0.999648	0.108	0.167	1	SMO	Proliferating_S
0.146666	-0.382731	0.194	0.276	1	ITGA2	Proliferating_S
0.161105	-0.42394	0.419	0.484	1	BMPR2	Proliferating_S
0.163279	-0.580623	0.075	0.13	1	PODXL	Proliferating_S
0.16544	0.147403	0.763	0.708	1	IL13RA1	Proliferating_S
0.168185	-1.28753	0.022	0.057	1	GPR1	Proliferating_S
0.170493	-0.541205	0.043	0.089	1	AGTR1	Proliferating_S
0.174827	-1.19647	0.022	0.057	1	ACKR4	Proliferating_S
0.176119	-0.595136	0.172	0.234	1	NECTIN3	Proliferating_S
0.182057	-1.4444	0.043	0.083	1	PLXNA2	Proliferating_S
0.213299	0.439365	0.065	0.031	1	CXCR4	Proliferating_S
0.222676	0.164633	0.645	0.562	1	ITGAV	Proliferating_S
0.237775	0.968626	0.054	0.026	1	CHRNA5	Proliferating_S
0.278601	-0.782735	0.032	0.062	1	ACVR2B	Proliferating_S
0.280805	0.179277	0.688	0.651	1	ADIPOR1	Proliferating_S
0.28458	0.280312	0.527	0.484	1	NECTIN2	Proliferating_S
0.285284	1.1381	0.065	0.036	1	NTNG2	Proliferating_S
0.291514	0.215252	0.226	0.172	1	LEPR	Proliferating_S
0.293896	0.180862	0.204	0.146	1	FZD7	Proliferating_S
0.310529	0.217858	0.548	0.453	1	DAG1	Proliferating_S
0.312927	-0.723558	0.065	0.099	1	NPR2	Proliferating_S
0.313247	0.147609	0.484	0.438	1	PTPRF	Proliferating_S
0.314765	-0.484943	0.14	0.182	1	JAM2	Proliferating_S
0.326463	-0.323534	0.387	0.417	1	SV2A	Proliferating_S
0.33149	0.300645	0.183	0.135	1	CNTNAP1	Proliferating_S
0.34593	-0.846706	0.054	0.083	1	PLXNB1	Proliferating_S
0.396116	0.146321	0.527	0.453	1	ITGAE	Proliferating_S
0.399957	-0.25892	0.387	0.401	1	IL17RA	Proliferating_S
0.409875	-0.372067	0.409	0.417	1	IFNGR1	Proliferating_S
0.427884	0.285684	0.151	0.115	1	NOTCH1	Proliferating_S
0.428367	-0.358024	0.075	0.104	1	FZD3	Proliferating_S
0.43509	-0.292603	0.043	0.068	1	NTNG1	Proliferating_S
0.439871	-0.767485	0.065	0.089	1	CD34	Proliferating_S
0.447662	0.165826	0.634	0.552	1	ACKR3	Proliferating_S
0.459326	-0.374433	0.065	0.089	1	FGFR2	Proliferating_S
0.461931	-0.406874	0.032	0.052	1	PECAM1	Proliferating_S
0.467583	0.266724	0.151	0.115	1	FZD10	Proliferating_S
0.483319	0.143544	0.086	0.062	1	CD274	Proliferating_S
0.517516	-0.180016	0.634	0.63	1	BDKRB1	Proliferating_S
0.517972	-0.190552	0.226	0.271	1	ITGB8	Proliferating_S
0.521172	-0.535595	0.301	0.312	1	IL7R	Proliferating_S
0.53188	0.368381	0.14	0.115	1	SORT1	Proliferating_S
0.554697	0.145903	0.215	0.177	1	CD4	Proliferating_S
0.568369	0.229834	0.065	0.047	1	IL27RA	Proliferating_S
0.578354	-0.211895	0.409	0.427	1	FAS	Proliferating_S
0.581875	-0.534676	0.043	0.057	1	CDH2	Proliferating_S
0.594272	0.132864	0.269	0.234	1	CD40	Proliferating_S
0.594716	0.314077	0.237	0.208	1	EPHB4	Proliferating_S
0.594976	-0.298673	0.065	0.083	1	PTCH1	Proliferating_S
0.686412	-0.158097	0.237	0.255	1	PARD3	Proliferating_S
0.691194	0.390317	0.151	0.135	1	TNFRSF14	Proliferating_S
0.727598	-0.161499	0.14	0.156	1	NECTIN1	Proliferating_S
0.734495	-0.133033	0.344	0.349	1	IL17RC	Proliferating_S
0.748413	-0.16142	0.129	0.141	1	ADORA2B	Proliferating_S
0.808205	0.291034	0.065	0.057	1	IL1RL2	Proliferating_S
0.818948	-0.150721	0.161	0.167	1	PLXNA4	Proliferating_S
0.830982	-0.230049	0.215	0.219	1	PTPRM	Proliferating_S
0.837912	0.177978	0.409	0.411	1	IL4R	Proliferating_S
0.843236	0.147409	0.387	0.375	1	PLXNA3	Proliferating_S
0.86067	-0.110423	0.065	0.057	1	TLR4	Proliferating_S
0.874955	0.495216	0.075	0.073	1	FZD6	Proliferating_S
0.885425	-0.173816	0.054	0.057	1	BMPR1B	Proliferating_S
0.968501	0.328411	0.161	0.161	1	NPR3	Proliferating_S
0.976405	-0.463838	0.129	0.12	1	CD74	Proliferating_S
2.41664e-11	-6.90693	0	0.1	6.13513e-07	IL12RB2	FC-Degenerated
2.41664e-11	-6.73109	0	0.1	6.13513e-07	IL18RAP	FC-Degenerated
5.35452e-08	-3.77679	0.02	0.3	0.00135935	ERBB2	FC-Degenerated
9.25224e-06	-3.82909	0.013	0.2	0.234887	FZD4	FC-Degenerated
1.18287e-05	-3.30703	0.013	0.2	0.300296	NGFR	FC-Degenerated
2.35032e-05	-2.06289	0.087	0.5	0.596676	NOTCH3	FC-Degenerated
2.87064e-05	-2.56676	0.033	0.3	0.728769	CD74	FC-Degenerated
3.7126e-05	-3.62018	0.016	0.2	0.942517	IL3RA	FC-Degenerated
3.87807e-05	-3.29796	0.016	0.2	0.984525	CHRNE	FC-Degenerated
5.41666e-05	-1.66316	0.344	0.9	1	SDC2	FC-Degenerated
7.62587e-05	-2.35535	0.105	0.5	1	JAG1	FC-Degenerated
0.00019209	-2.84289	0.042	0.3	1	ITGB3	FC-Degenerated
0.000208427	-5.58632	0.004	0.1	1	MCHR1	FC-Degenerated
0.000208427	-5.19261	0.004	0.1	1	NECTIN4	FC-Degenerated
0.000223122	-4.2059	0.004	0.1	1	NTRK1	FC-Degenerated
0.000238785	-4.30321	0.004	0.1	1	CLDN11	FC-Degenerated
0.000354962	-2.28296	0.045	0.3	1	CHRNB1	FC-Degenerated
0.000503074	-3.24785	0.022	0.2	1	PLXNC1	FC-Degenerated
0.000534251	-1.79865	0.045	0.3	1	IL1RL2	FC-Degenerated
0.000729667	-2.17246	0.047	0.3	1	JAM2	FC-Degenerated
0.00173149	-4.4393	0.007	0.1	1	IL27RA	FC-Degenerated
0.00185976	-1.54883	0.127	0.5	1	CAP1	FC-Degenerated
0.00289434	-2.05808	0.058	0.3	1	BMPR1A	FC-Degenerated
0.00302521	-0.964099	0.605	1	1	ITGA5	FC-Degenerated
0.00652311	-1.08684	0.232	0.7	1	ACVR1	FC-Degenerated
0.00714677	0.390383	0.971	1	1	CD44	FC-Degenerated
0.00875359	0.861805	0.855	0.8	1	NRP2	FC-Degenerated
0.00880508	-1.94817	0.071	0.3	1	IL18R1	FC-Degenerated
0.00900694	-1.52952	0.112	0.4	1	LRP5	FC-Degenerated
0.0100984	-1.35361	0.109	0.4	1	ITGA11	FC-Degenerated
0.0177462	-1.94281	0.04	0.2	1	PECAM1	FC-Degenerated
0.0190275	1.84953	0.565	0.2	1	TNFRSF1B	FC-Degenerated
0.0202359	1.84438	0.603	0.4	1	ACKR3	FC-Degenerated
0.0260384	-1.16917	0.254	0.6	1	IFNGR1	FC-Degenerated
0.0290385	-1.17239	0.085	0.3	1	NTRK2	FC-Degenerated
0.0337363	2.05362	0.446	0.1	1	ITGB8	FC-Degenerated
0.0367667	1.5428	0.652	0.5	1	TNFRSF11B	FC-Degenerated
0.0379991	-1.48068	0.096	0.3	1	IL1RL1	FC-Degenerated
0.0406069	2.20563	0.411	0.1	1	ITGA1	FC-Degenerated
0.0511035	0.682027	0.806	0.8	1	SDC4	FC-Degenerated
0.055162	-1.21474	0.051	0.2	1	FZD6	FC-Degenerated
0.0566202	0.884707	0.69	0.8	1	TNFRSF12A	FC-Degenerated
0.0570776	3.29024	0.275	0	1	CD274	FC-Degenerated
0.0590385	2.36709	0.435	0.2	1	VCAM1	FC-Degenerated
0.0615952	0.327876	0.848	1	1	ITGB1	FC-Degenerated
0.0666916	-2.6611	0.018	0.1	1	IL1R2	FC-Degenerated
0.0690323	1.02034	0.647	0.5	1	ITGB5	FC-Degenerated
0.0741586	-1.0603	0.163	0.4	1	PLXNA1	FC-Degenerated
0.07926	-0.590928	0.257	0.6	1	CD99L2	FC-Degenerated
0.0823112	-1.26893	0.112	0.3	1	FZD2	FC-Degenerated
0.0890714	3.11986	0.23	0	1	PILRA	FC-Degenerated
0.0905787	-1.3704	0.185	0.4	1	PDGFRB	FC-Degenerated
0.0949218	-2.02926	0.02	0.1	1	FZD9	FC-Degenerated
0.0960774	-1.23209	0.118	0.3	1	LIFR	FC-Degenerated
0.0977866	-0.886899	0.17	0.4	1	ICAM1	FC-Degenerated
0.0988635	-1.77503	0.065	0.2	1	NOTCH1	FC-Degenerated
0.108736	-0.549967	0.605	1	1	NOTCH2	FC-Degenerated
0.114024	-2.06577	0.022	0.1	1	OXTR	FC-Degenerated
0.118376	-1.20435	0.065	0.2	1	TNFRSF9	FC-Degenerated
0.120299	-0.965239	0.27	0.5	1	CADM1	FC-Degenerated
0.124209	0.71556	0.737	0.7	1	CD55	FC-Degenerated
0.127197	-0.67387	0.373	0.7	1	LTBR	FC-Degenerated
0.127276	1.72587	0.317	0.1	1	MET	FC-Degenerated
0.132022	-1.21691	0.069	0.2	1	SSTR2	FC-Degenerated
0.139776	-0.746835	0.181	0.4	1	PARD3	FC-Degenerated
0.150341	-1.04229	0.134	0.3	1	FZD7	FC-Degenerated
0.152199	-1.74654	0.025	0.1	1	CDH15	FC-Degenerated
0.180452	-1.66209	0.027	0.1	1	CADM3	FC-Degenerated
0.180452	-1.83953	0.027	0.1	1	EPHB3	FC-Degenerated
0.183848	-0.980735	0.141	0.3	1	IL13RA2	FC-Degenerated
0.209639	1.089	0.473	0.4	1	BDKRB2	FC-Degenerated
0.209926	0.586797	0.638	0.6	1	GLG1	FC-Degenerated
0.212041	-0.97037	0.147	0.3	1	LRP6	FC-Degenerated
0.214311	-2.63194	0.031	0.1	1	CD4	FC-Degenerated
0.214933	-0.59656	0.138	0.3	1	NEGR1	FC-Degenerated
0.218207	-1.43028	0.029	0.1	1	IL17RB	FC-Degenerated
0.22445	-0.506642	0.489	0.8	1	ADIPOR1	FC-Degenerated
0.226103	-1.88038	0.031	0.1	1	C5AR1	FC-Degenerated
0.229094	0.625269	0.625	0.6	1	LRP1	FC-Degenerated
0.238556	0.984638	0.464	0.4	1	BDKRB1	FC-Degenerated
0.251936	-0.551009	0.143	0.3	1	PTPRF	FC-Degenerated
0.258696	-0.799931	0.257	0.4	1	IL7R	FC-Degenerated
0.263647	-0.5064	0.283	0.5	1	BMPR2	FC-Degenerated
0.26555	1.72879	0.112	0	1	ITGA3	FC-Degenerated
0.274432	-0.535033	0.371	0.6	1	PLXNB2	FC-Degenerated
0.287825	1.75281	0.103	0	1	ITGA10	FC-Degenerated
0.300372	-0.543397	0.297	0.5	1	ADIPOR2	FC-Degenerated
0.304573	-0.312079	0.375	0.7	1	TNFRSF1A	FC-Degenerated
0.310143	0.67926	0.493	0.4	1	IL13RA1	FC-Degenerated
0.310508	-1.19239	0.036	0.1	1	NTNG2	FC-Degenerated
0.311153	1.60913	0.214	0.1	1	TGFBR2	FC-Degenerated
0.314344	0.978366	0.424	0.4	1	INSR	FC-Degenerated
0.317126	1.27175	0.217	0.1	1	TNFRSF10A	FC-Degenerated
0.345593	1.1375	0.083	0	1	EDA2R	FC-Degenerated
0.352772	1.21215	0.08	0	1	SDC3	FC-Degenerated
0.367653	1.21185	0.076	0	1	PTCH1	FC-Degenerated
0.367653	1.25767	0.076	0	1	TNFRSF14	FC-Degenerated
0.369042	-0.899576	0.105	0.2	1	ACVR1B	FC-Degenerated
0.369844	-0.71353	0.1	0.2	1	ITGAE	FC-Degenerated
0.382901	-0.58644	0.172	0.3	1	SV2A	FC-Degenerated
0.384015	-0.990904	0.04	0.1	1	SMO	FC-Degenerated
0.389751	-0.317426	0.1	0.2	1	NECTIN3	FC-Degenerated
0.391394	1.16078	0.069	0	1	EDNRA	FC-Degenerated
0.408265	1.00058	0.065	0	1	TLR4	FC-Degenerated
0.409065	-1.04457	0.042	0.1	1	AGTR1	FC-Degenerated
0.433705	0.565001	0.449	0.4	1	IGF2R	FC-Degenerated
0.445532	-0.395929	0.248	0.4	1	NLGN2	FC-Degenerated
0.448945	-0.284424	0.48	0.8	1	IFNAR1	FC-Degenerated
0.454714	0.498994	0.054	0	1	ITGA6	FC-Degenerated
0.454714	0.578911	0.054	0	1	ADORA2B	FC-Degenerated
0.454925	-0.19639	0.42	0.7	1	PDGFRA	FC-Degenerated
0.516715	1.60443	0.163	0.1	1	CXCR4	FC-Degenerated
0.521734	-0.809228	0.129	0.2	1	IL6R	FC-Degenerated
0.527672	-0.617041	0.228	0.3	1	IL10RB	FC-Degenerated
0.560885	-0.164766	0.194	0.3	1	CDH11	FC-Degenerated
0.561994	-0.673902	0.054	0.1	1	IL1RAP	FC-Degenerated
0.563781	0.829817	0.156	0.1	1	PTPRM	FC-Degenerated
0.576931	-0.168449	0.192	0.3	1	IL15RA	FC-Degenerated
0.580945	0.205034	0.636	0.7	1	OSMR	FC-Degenerated
0.581282	-0.192453	0.641	0.7	1	AXL	FC-Degenerated
0.595088	-0.766482	0.141	0.2	1	ITGA2	FC-Degenerated
0.612743	-0.193451	0.781	1	1	CD99	FC-Degenerated
0.613961	-0.310254	0.42	0.5	1	ITGAV	FC-Degenerated
0.6143	-0.275065	0.502	0.6	1	IL1R1	FC-Degenerated
0.620952	-0.843619	0.06	0.1	1	PLXND1	FC-Degenerated
0.635091	0.341053	0.154	0.1	1	CMKLR1	FC-Degenerated
0.63544	-0.717799	0.246	0.3	1	NECTIN2	FC-Degenerated
0.639237	-1.54774	0.067	0.1	1	FZD3	FC-Degenerated
0.641636	-0.615207	0.06	0.1	1	ADORA1	FC-Degenerated
0.643459	-0.403503	0.138	0.2	1	FAS	FC-Degenerated
0.67798	0.835331	0.134	0.1	1	CD40	FC-Degenerated
0.67871	0.219856	0.201	0.3	1	ALCAM	FC-Degenerated
0.681068	-0.207288	0.663	0.9	1	IL6ST	FC-Degenerated
0.689866	-1.05175	0.069	0.1	1	IFNAR2	FC-Degenerated
0.699828	-0.692435	0.067	0.1	1	ACVR2B	FC-Degenerated
0.712927	0.887928	0.127	0.1	1	LEPR	FC-Degenerated
0.727153	0.318456	0.471	0.6	1	CD47	FC-Degenerated
0.731094	-0.151448	0.777	0.9	1	FGFR1	FC-Degenerated
0.735985	0.168061	0.136	0.1	1	IL17RC	FC-Degenerated
0.773772	-0.201588	0.152	0.2	1	IGF1R	FC-Degenerated
0.784511	0.219294	0.214	0.3	1	TGFBR1	FC-Degenerated
0.799173	0.701522	0.116	0.1	1	NECTIN1	FC-Degenerated
0.808143	-0.656228	0.08	0.1	1	SDC1	FC-Degenerated
0.80824	0.101972	0.232	0.3	1	FZD1	FC-Degenerated
0.827913	0.190822	0.368	0.5	1	FZD8	FC-Degenerated
0.829428	0.166478	0.15	0.2	1	NRP1	FC-Degenerated
0.884075	0.453693	0.192	0.2	1	EPHB2	FC-Degenerated
0.957103	0.34425	0.098	0.1	1	FZD10	FC-Degenerated
0.965242	-0.179599	0.103	0.1	1	GFRA2	FC-Degenerated
0.973129	0.203541	0.188	0.2	1	JAM3	FC-Degenerated
1.69895e-06	-1.90644	0.319	0.929	0.0431313	IL2RA	Macrophage
4.46e-06	-3.49427	0.053	0.429	0.113226	CCR7	Macrophage
1.38142e-05	-1.95839	0.274	0.786	0.350701	FZD1	Macrophage
3.18456e-05	-4.90801	0.009	0.214	0.808464	CD226	Macrophage
5.92241e-05	-5.38987	0	0.143	1	OXTR	Macrophage
9.0446e-05	-1.5092	0.478	0.929	1	CD74	Macrophage
0.000185198	-4.17946	0.035	0.286	1	MCAM	Macrophage
0.000264331	-2.47598	0.133	0.5	1	NOTCH3	Macrophage
0.000587092	2.45519	0.699	0.214	1	C5AR1	Macrophage
0.000593892	-1.90969	0.274	0.643	1	PDGFRB	Macrophage
0.000765425	-1.57467	0.292	0.714	1	ICAM1	Macrophage
0.000945572	-1.86223	0.212	0.571	1	ITGA11	Macrophage
0.00122181	-1.47942	0.319	0.714	1	ALCAM	Macrophage
0.00245021	-1.98211	0.186	0.5	1	PTPRF	Macrophage
0.00285838	-2.30758	0.142	0.429	1	JAG1	Macrophage
0.00486432	-4.59953	0	0.071	1	IL12RB2	Macrophage
0.00486432	-4.88569	0	0.071	1	TNFRSF4	Macrophage
0.00486432	-5.46954	0	0.071	1	NPY1R	Macrophage
0.00486432	-4.2281	0	0.071	1	CLDN11	Macrophage
0.00486432	-4.72773	0	0.071	1	EPHA5	Macrophage
0.00486432	-4.82145	0	0.071	1	NLGN1	Macrophage
0.00641927	-1.33439	0.248	0.571	1	IL15RA	Macrophage
0.00722895	-1.84268	0.035	0.214	1	ACVR2B	Macrophage
0.00790596	3.82588	0.363	0	1	ADIPOR2	Macrophage
0.00960667	-1.18657	0.327	0.643	1	PLXND1	Macrophage
0.0107676	-3.22914	0.044	0.214	1	NPR3	Macrophage
0.0116188	-1.37851	0.106	0.357	1	IL2RG	Macrophage
0.0165309	-0.752408	0.558	0.857	1	CD47	Macrophage
0.0210657	0.77023	0.912	0.786	1	TNFRSF1B	Macrophage
0.0214049	-0.84988	0.504	0.786	1	PDGFRA	Macrophage
0.0224039	1.3884	0.602	0.357	1	IL13RA1	Macrophage
0.0284741	-2.12089	0.097	0.286	1	PARD3	Macrophage
0.0294838	-1.98651	0.097	0.286	1	TNFRSF9	Macrophage
0.0324885	-0.464045	0.858	1	1	CD99	Macrophage
0.0334764	-0.888074	0.363	0.643	1	CD40	Macrophage
0.0353471	1.56736	0.504	0.214	1	IFNGR1	Macrophage
0.040517	2.66831	0.327	0.071	1	CMKLR1	Macrophage
0.0474988	3.03692	0.23	0	1	SORT1	Macrophage
0.0516365	-0.581541	0.628	0.857	1	ITGB8	Macrophage
0.0529917	2.93591	0.221	0	1	ITGAE	Macrophage
0.0668444	1.13459	0.549	0.286	1	IL10RB	Macrophage
0.0722659	0.859889	0.655	0.429	1	ADIPOR1	Macrophage
0.0735576	0.738062	0.699	0.5	1	CD55	Macrophage
0.0752216	1.43676	0.46	0.214	1	BMPR2	Macrophage
0.0772303	-3.16695	0.009	0.071	1	EDNRB	Macrophage
0.0772303	-3.38227	0.009	0.071	1	NRCAM	Macrophage
0.0772303	-3.10218	0.009	0.071	1	PODXL	Macrophage
0.0833999	-2.60666	0.009	0.071	1	FLT4	Macrophage
0.0847919	-1.33907	0.115	0.286	1	ITGA10	Macrophage
0.0911523	-1.34767	0.195	0.357	1	JAM3	Macrophage
0.0925629	-0.161056	0.991	1	1	CD44	Macrophage
0.108868	0.927722	0.602	0.5	1	TNFRSF11B	Macrophage
0.118649	-0.487731	0.761	0.857	1	ITGA5	Macrophage
0.123178	-0.704638	0.354	0.571	1	EGFR	Macrophage
0.126521	-1.99053	0.044	0.143	1	EPHA2	Macrophage
0.136519	2.52838	0.142	0	1	MERTK	Macrophage
0.136519	2.1966	0.142	0	1	DSG2	Macrophage
0.146053	0.52302	0.389	0.143	1	TGFBR1	Macrophage
0.149252	1.07227	0.584	0.5	1	CXCR4	Macrophage
0.153556	-0.427656	0.655	0.786	1	GLG1	Macrophage
0.156378	0.647767	0.478	0.214	1	IL4R	Macrophage
0.158975	-0.594931	0.496	0.643	1	NECTIN2	Macrophage
0.167437	2.14147	0.124	0	1	IL1RL1	Macrophage
0.177953	-1.60054	0.168	0.286	1	FLT1	Macrophage
0.182772	-1.45562	0.106	0.214	1	IFNAR2	Macrophage
0.185391	1.94443	0.115	0	1	LRP5	Macrophage
0.185391	2.53468	0.115	0	1	FPR1	Macrophage
0.194458	1.14879	0.319	0.143	1	SDC1	Macrophage
0.19866	0.953519	0.398	0.214	1	CD99L2	Macrophage
0.205286	1.81975	0.106	0	1	EPOR	Macrophage
0.208296	-3.36766	0.018	0.071	1	MPZ	Macrophage
0.214643	0.530841	0.637	0.429	1	CCR1	Macrophage
0.219071	-2.37825	0.018	0.071	1	MC1R	Macrophage
0.219071	-1.3606	0.018	0.071	1	CHRNE	Macrophage
0.227376	2.08415	0.097	0	1	FZD2	Macrophage
0.227376	0.977616	0.097	0	1	ADORA2B	Macrophage
0.23024	-1.71149	0.018	0.071	1	L1CAM	Macrophage
0.233932	1.53441	0.283	0.143	1	LILRB3	Macrophage
0.249828	-0.368315	0.735	1	1	SDC2	Macrophage
0.251973	1.44873	0.088	0	1	FZD3	Macrophage
0.251973	1.6008	0.088	0	1	IL18R1	Macrophage
0.251973	1.25546	0.088	0	1	ITGA3	Macrophage
0.262946	-0.569064	0.204	0.357	1	CSF2RA	Macrophage
0.266952	-1.02531	0.177	0.286	1	TNFRSF14	Macrophage
0.278618	0.544146	0.549	0.429	1	ACKR3	Macrophage
0.279456	1.07017	0.08	0	1	ITGA6	Macrophage
0.279456	0.864784	0.08	0	1	PTCH1	Macrophage
0.279456	0.861865	0.08	0	1	SV2A	Macrophage
0.282393	0.50996	0.655	0.571	1	ITGB2	Macrophage
0.28909	0.412499	0.761	0.571	1	IFNAR1	Macrophage
0.29144	-0.657477	0.239	0.357	1	IL6R	Macrophage
0.297943	0.232077	0.319	0.143	1	ITGA1	Macrophage
0.302921	-1.87093	0.071	0.143	1	EDA2R	Macrophage
0.306175	1.48514	0.177	0.071	1	NOTCH1	Macrophage
0.30701	-0.340692	0.274	0.429	1	IL3RA	Macrophage
0.310308	1.039	0.071	0	1	BMPR1A	Macrophage
0.310308	2.21826	0.071	0	1	IL1R2	Macrophage
0.310308	1.23843	0.071	0	1	TNFRSF11A	Macrophage
0.315142	0.89085	0.265	0.143	1	ITGA2	Macrophage
0.318176	-0.37243	0.496	0.571	1	TNFRSF1A	Macrophage
0.32672	-2.12797	0.071	0.143	1	EPHB4	Macrophage
0.328344	-0.266886	0.611	0.714	1	NRP1	Macrophage
0.3374	0.353458	0.673	0.5	1	IGF2R	Macrophage
0.343244	-1.22962	0.071	0.143	1	NECTIN3	Macrophage
0.345154	1.21206	0.062	0	1	ACVRL1	Macrophage
0.345154	0.953604	0.062	0	1	GFRA2	Macrophage
0.345154	1.52181	0.062	0	1	ITGA8	Macrophage
0.35307	-2.27959	0.027	0.071	1	EDNRA	Macrophage
0.359289	1.05759	0.168	0.071	1	TLR4	Macrophage
0.363996	0.947004	0.31	0.214	1	CSF1R	Macrophage
0.366415	-1.96762	0.027	0.071	1	FGFR3	Macrophage
0.372633	-1.74519	0.08	0.143	1	CADM3	Macrophage
0.380822	0.761567	0.319	0.214	1	F11R	Macrophage
0.3846	-0.38309	0.584	0.643	1	ITGAV	Macrophage
0.384839	0.408384	0.053	0	1	GHR	Macrophage
0.384839	0.936035	0.053	0	1	FPR2	Macrophage
0.384839	0.458284	0.053	0	1	GPR37L1	Macrophage
0.384839	0.654362	0.053	0	1	ADORA1	Macrophage
0.384839	0.414639	0.053	0	1	NTNG2	Macrophage
0.384839	0.709643	0.053	0	1	SELL	Macrophage
0.385599	-0.383214	0.469	0.571	1	VCAM1	Macrophage
0.393822	0.486461	0.469	0.357	1	BDKRB1	Macrophage
0.407426	-1.30561	0.08	0.143	1	FZD10	Macrophage
0.412453	0.110656	0.168	0.071	1	FZD7	Macrophage
0.429367	-0.254725	0.381	0.5	1	ITGAX	Macrophage
0.431852	-0.28828	0.681	0.714	1	IFNGR2	Macrophage
0.444151	-0.479985	0.487	0.5	1	BDKRB2	Macrophage
0.450054	-0.32212	0.363	0.5	1	PTPRC	Macrophage
0.455557	-0.414145	0.292	0.357	1	ACVR1	Macrophage
0.456145	0.210849	0.699	0.714	1	SDC4	Macrophage
0.469399	-0.287151	0.681	0.714	1	IL6ST	Macrophage
0.48042	-0.49249	0.212	0.286	1	FAS	Macrophage
0.485074	-1.16948	0.15	0.214	1	IL13RA2	Macrophage
0.486865	-0.862	0.319	0.357	1	CDH11	Macrophage
0.489059	0.148648	0.46	0.357	1	PLXNB2	Macrophage
0.493079	-2.38605	0.035	0.071	1	FZD4	Macrophage
0.493079	-2.28228	0.035	0.071	1	ERBB2	Macrophage
0.497139	0.61238	0.425	0.357	1	INSR	Macrophage
0.503856	0.150234	0.805	0.786	1	NRP2	Macrophage
0.51356	-0.421542	0.522	0.643	1	OSMR	Macrophage
0.514486	0.207659	0.761	0.643	1	ITGB5	Macrophage
0.524307	0.409001	0.513	0.429	1	IL1R1	Macrophage
0.537316	-0.762993	0.035	0.071	1	IL1RL2	Macrophage
0.543559	0.371652	0.46	0.357	1	LTBR	Macrophage
0.549049	-0.383652	0.088	0.143	1	CCR5	Macrophage
0.570378	1.14697	0.186	0.143	1	LILRB1	Macrophage
0.590738	0.41444	0.283	0.214	1	PLXNA1	Macrophage
0.610845	-0.289455	0.301	0.357	1	IL10RA	Macrophage
0.611635	0.153473	0.212	0.143	1	C3AR1	Macrophage
0.615218	1.17643	0.115	0.071	1	HCST	Macrophage
0.616004	0.33169	0.195	0.143	1	LEPR	Macrophage
0.61664	-0.46744	0.319	0.357	1	NLGN2	Macrophage
0.617895	0.71835	0.274	0.214	1	PLXNA3	Macrophage
0.622654	-2.33414	0.044	0.071	1	JAM2	Macrophage
0.630718	-0.703784	0.124	0.071	1	PTPRM	Macrophage
0.635271	-0.955068	0.106	0.143	1	ITGAM	Macrophage
0.637532	-1.52456	0.044	0.071	1	CHRNB1	Macrophage
0.639992	0.337625	0.195	0.143	1	ITGB3	Macrophage
0.645842	0.147199	0.283	0.214	1	PECAM1	Macrophage
0.652557	-1.18023	0.044	0.071	1	TYRO3	Macrophage
0.665273	-0.966346	0.115	0.143	1	LIFR	Macrophage
0.677509	0.366551	0.319	0.286	1	FZD8	Macrophage
0.687373	0.228218	0.097	0.143	1	MRC1	Macrophage
0.703723	0.149405	0.274	0.214	1	CD209	Macrophage
0.705185	-0.478627	0.177	0.214	1	LILRB2	Macrophage
0.721058	0.314609	0.46	0.429	1	MET	Macrophage
0.740722	-1.74667	0.053	0.071	1	IL17RE	Macrophage
0.770311	-0.959666	0.053	0.071	1	ACVR2A	Macrophage
0.770311	-1.15517	0.053	0.071	1	ITGAL	Macrophage
0.773111	-0.418315	0.195	0.214	1	PVR	Macrophage
0.779487	-0.20401	0.54	0.5	1	TNFRSF12A	Macrophage
0.782457	-0.476422	0.186	0.214	1	MARCO	Macrophage
0.785235	-1.08278	0.053	0.071	1	CNTNAP1	Macrophage
0.79809	0.34672	0.168	0.143	1	CAP1	Macrophage
0.80343	0.569807	0.159	0.143	1	ACVR1B	Macrophage
0.819932	0.481524	0.168	0.214	1	HAVCR2	Macrophage
0.837466	0.244391	0.088	0.071	1	NCAM1	Macrophage
0.845641	0.110318	0.257	0.286	1	TNFRSF10A	Macrophage
0.862198	-0.576674	0.088	0.071	1	IGF1R	Macrophage
0.87053	-0.209944	0.265	0.286	1	NEGR1	Macrophage
0.875656	-0.209839	0.257	0.214	1	SDC3	Macrophage
0.888576	0.456226	0.08	0.071	1	PLXNA2	Macrophage
0.958597	-1.04499	0.071	0.071	1	AGTR1	Macrophage
0.966979	-0.163304	0.336	0.286	1	CD274	Macrophage
0.972391	-0.461863	0.071	0.071	1	SMO	Macrophage
0.986194	-0.52896	0.071	0.071	1	PLXNA4	Macrophage
1	-0.363295	0.15	0.143	1	IL17RC	Macrophage
1.28175e-11	-6.77916	0	0.053	3.25397e-07	NCR3	FC-ECM
1.12445e-07	-4.61469	0.005	0.105	0.00285465	NGFR	FC-ECM
1.01826e-06	-5.50103	0.006	0.105	0.0258506	NCAM1	FC-ECM
9.03049e-05	-2.04311	0.097	0.368	1	EDA2R	FC-ECM
0.00150731	-4.34296	0.003	0.053	1	ADCYAP1R1	FC-ECM
0.0016873	0.321983	0.995	1	1	CD44	FC-ECM
0.00227512	-1.87328	0.074	0.263	1	IL1RAP	FC-ECM
0.00254462	-0.300019	0.977	1	1	CD99	FC-ECM
0.00272449	-2.11515	0.031	0.158	1	MCAM	FC-ECM
0.0095635	0.757595	0.856	0.579	1	TNFRSF11B	FC-ECM
0.0115204	-2.22112	0.066	0.211	1	FGFR2	FC-ECM
0.0129261	-4.91046	0.006	0.053	1	IL31RA	FC-ECM
0.0138794	-3.30331	0.006	0.053	1	CD72	FC-ECM
0.0139491	-2.51212	0.021	0.105	1	FGFR3	FC-ECM
0.0205962	1.11888	0.562	0.368	1	CDH11	FC-ECM
0.02075	3.19065	0.225	0	1	FZD7	FC-ECM
0.024845	-3.67605	0.007	0.053	1	GPR19	FC-ECM
0.0256133	-3.46233	0.007	0.053	1	ITGAX	FC-ECM
0.0258317	-0.922354	0.322	0.526	1	CMKLR1	FC-ECM
0.026753	-0.563751	0.88	1	1	ITGA5	FC-ECM
0.0275888	-2.1069	0.024	0.105	1	FLT1	FC-ECM
0.0352198	-0.628482	0.575	0.789	1	LTBR	FC-ECM
0.0352638	3.27124	0.192	0	1	IL7R	FC-ECM
0.0466266	0.622282	0.485	0.211	1	CADM1	FC-ECM
0.0503836	-1.59239	0.027	0.105	1	EDNRA	FC-ECM
0.0527239	-1.69412	0.055	0.158	1	IL17RB	FC-ECM
0.053692	3.02645	0.166	0	1	NPR3	FC-ECM
0.0553639	1.10776	0.48	0.263	1	ITGB8	FC-ECM
0.0554869	0.338983	0.887	0.789	1	AXL	FC-ECM
0.0577098	-0.500836	0.63	0.737	1	SDC2	FC-ECM
0.0590957	-3.33427	0.009	0.053	1	ITGA7	FC-ECM
0.062676	-2.83073	0.009	0.053	1	ITGB6	FC-ECM
0.0628089	0.409847	0.822	0.684	1	ACKR3	FC-ECM
0.0809291	-1.53258	0.132	0.263	1	PLXND1	FC-ECM
0.0943322	-0.277859	0.877	0.895	1	ITGB5	FC-ECM
0.0952482	0.760931	0.503	0.316	1	TGFBR2	FC-ECM
0.103293	2.37549	0.124	0	1	CD274	FC-ECM
0.105431	-0.556519	0.408	0.579	1	ITGA11	FC-ECM
0.107693	1.87388	0.192	0.053	1	CD40	FC-ECM
0.108605	-1.36411	0.065	0.158	1	ERBB2	FC-ECM
0.11057	0.481403	0.765	0.684	1	BDKRB2	FC-ECM
0.117874	-1.29438	0.151	0.263	1	ACVR1B	FC-ECM
0.118338	0.210047	0.865	0.842	1	OSMR	FC-ECM
0.123456	1.80479	0.188	0.053	1	FZD10	FC-ECM
0.126801	-0.67442	0.545	0.579	1	TNFRSF1A	FC-ECM
0.127222	2.10944	0.11	0	1	ADORA1	FC-ECM
0.128483	-0.547083	0.536	0.632	1	PDGFRB	FC-ECM
0.132004	0.564803	0.644	0.474	1	IGF2R	FC-ECM
0.146116	1.93109	0.101	0	1	IL17RE	FC-ECM
0.146116	1.86282	0.101	0	1	EPOR	FC-ECM
0.147247	-0.502059	0.422	0.579	1	NTRK2	FC-ECM
0.153899	1.79346	0.097	0	1	ITGA3	FC-ECM
0.156585	1.99206	0.096	0	1	FZD6	FC-ECM
0.159125	0.55655	0.334	0.158	1	IL17RC	FC-ECM
0.159416	-1.34841	0.117	0.211	1	CD4	FC-ECM
0.162099	1.81393	0.094	0	1	PILRA	FC-ECM
0.164724	-0.984277	0.11	0.211	1	IL6R	FC-ECM
0.173601	0.265009	0.585	0.368	1	NLGN2	FC-ECM
0.173995	-1.39426	0.041	0.105	1	ITGA9	FC-ECM
0.184139	-0.487744	0.605	0.632	1	PLXNB2	FC-ECM
0.18584	-0.512148	0.266	0.421	1	IL15RA	FC-ECM
0.192203	1.42515	0.156	0.053	1	ADORA2B	FC-ECM
0.196596	1.15627	0.164	0.053	1	DSG2	FC-ECM
0.199765	0.401908	0.416	0.263	1	BMPR2	FC-ECM
0.206689	1.40176	0.078	0	1	NPR2	FC-ECM
0.219241	-2.09409	0.016	0.053	1	CHRNE	FC-ECM
0.22165	1.37303	0.073	0	1	SELL	FC-ECM
0.235363	-0.296487	0.847	0.842	1	NRP2	FC-ECM
0.246362	0.533839	0.399	0.263	1	ACVR1	FC-ECM
0.248114	0.492842	0.507	0.316	1	IL10RB	FC-ECM
0.262151	0.717677	0.149	0.053	1	IFNAR2	FC-ECM
0.269039	-0.449389	0.494	0.632	1	MPZL1	FC-ECM
0.281277	-1.19611	0.049	0.105	1	FZD4	FC-ECM
0.289156	1.03743	0.056	0	1	ACVR2B	FC-ECM
0.291156	-0.576174	0.332	0.421	1	PLXNA4	FC-ECM
0.292893	0.322018	0.294	0.158	1	ALCAM	FC-ECM
0.293506	1.16975	0.129	0.053	1	BMPR1A	FC-ECM
0.294646	0.36709	0.557	0.368	1	TNFRSF1B	FC-ECM
0.312826	0.309307	0.557	0.368	1	TNFRSF12A	FC-ECM
0.323349	0.247929	0.38	0.263	1	IFNGR1	FC-ECM
0.324897	-1.13564	0.143	0.211	1	TNFRSF10A	FC-ECM
0.328324	-0.509023	0.397	0.474	1	TGFBR1	FC-ECM
0.337468	-0.249939	0.617	0.737	1	FZD8	FC-ECM
0.352311	0.274969	0.739	0.684	1	BDKRB1	FC-ECM
0.359961	-0.123007	0.95	0.947	1	LRP1	FC-ECM
0.362651	0.525729	0.252	0.158	1	SV2A	FC-ECM
0.375649	-0.693278	0.188	0.263	1	NRP1	FC-ECM
0.377298	1.37284	0.116	0.053	1	CXCR4	FC-ECM
0.377506	0.654873	0.12	0.053	1	NECTIN1	FC-ECM
0.395306	-0.599098	0.265	0.316	1	IL17RA	FC-ECM
0.404755	0.214492	0.605	0.474	1	ITGAV	FC-ECM
0.415856	-0.643342	0.12	0.053	1	NECTIN3	FC-ECM
0.422646	-0.797636	0.058	0.105	1	ITGB3	FC-ECM
0.427908	0.23229	0.659	0.632	1	VCAM1	FC-ECM
0.429047	-0.783323	0.103	0.158	1	FZD3	FC-ECM
0.443571	-0.106034	0.919	0.895	1	NCL	FC-ECM
0.450422	-0.684235	0.247	0.316	1	ITGA10	FC-ECM
0.455636	-1.03377	0.11	0.158	1	CAP1	FC-ECM
0.461731	-0.254007	0.355	0.474	1	ADIPOR2	FC-ECM
0.467034	0.244005	0.669	0.579	1	NOTCH2	FC-ECM
0.470427	0.187526	0.18	0.105	1	CNTNAP1	FC-ECM
0.472879	-0.650122	0.105	0.158	1	ITGA6	FC-ECM
0.483915	-0.857756	0.111	0.158	1	EPHA2	FC-ECM
0.490654	-1.55532	0.066	0.105	1	IL1RL2	FC-ECM
0.496533	-0.85995	0.151	0.211	1	PVR	FC-ECM
0.504782	0.231545	0.499	0.421	1	CD99L2	FC-ECM
0.511839	0.576231	0.262	0.211	1	IL13RA2	FC-ECM
0.513901	0.317563	0.341	0.263	1	JAM3	FC-ECM
0.518954	-0.449185	0.109	0.158	1	EPHB2	FC-ECM
0.523118	-0.158372	0.739	0.684	1	IL13RA1	FC-ECM
0.525834	-0.275241	0.289	0.368	1	LRP5	FC-ECM
0.532519	-0.930271	0.07	0.105	1	CHRNB1	FC-ECM
0.538385	0.341826	0.359	0.316	1	FAS	FC-ECM
0.55744	0.127316	0.798	0.684	1	IFNGR2	FC-ECM
0.569051	-0.670479	0.07	0.105	1	PTH1R	FC-ECM
0.570668	-0.423663	0.433	0.474	1	PTPRF	FC-ECM
0.575411	-0.443436	0.207	0.158	1	ITGA2	FC-ECM
0.57591	-1.10012	0.074	0.105	1	TLR4	FC-ECM
0.588613	0.305815	0.151	0.105	1	IGF1R	FC-ECM
0.603359	-0.626087	0.124	0.158	1	EPHB4	FC-ECM
0.605471	-0.300278	0.271	0.316	1	PTPRM	FC-ECM
0.63232	-0.48811	0.125	0.158	1	SDC1	FC-ECM
0.643238	-0.251256	0.69	0.789	1	CD55	FC-ECM
0.643455	-0.357466	0.118	0.158	1	JAM2	FC-ECM
0.645966	0.168133	0.202	0.158	1	LRP6	FC-ECM
0.652863	-0.225562	0.436	0.474	1	FZD1	FC-ECM
0.653571	-0.139572	0.567	0.579	1	NEGR1	FC-ECM
0.673146	-1.44455	0.036	0.053	1	PECAM1	FC-ECM
0.68716	0.140152	0.817	0.737	1	GLG1	FC-ECM
0.689012	0.120606	0.434	0.368	1	INSR	FC-ECM
0.699457	-0.218394	0.079	0.053	1	AGTR1	FC-ECM
0.707158	-0.999697	0.087	0.105	1	IL18R1	FC-ECM
0.712202	0.111393	0.074	0.053	1	PTCH1	FC-ECM
0.714394	-0.471581	0.036	0.053	1	ACVR2A	FC-ECM
0.714394	-0.59217	0.036	0.053	1	MPZ	FC-ECM
0.71596	-0.16049	0.749	0.684	1	CD47	FC-ECM
0.726728	0.101594	0.2	0.158	1	SDC3	FC-ECM
0.742681	-0.775129	0.038	0.053	1	SORT1	FC-ECM
0.744733	-0.62268	0.038	0.053	1	EPHB3	FC-ECM
0.746481	-0.264164	0.074	0.053	1	NCAM2	FC-ECM
0.747118	-0.23261	0.178	0.211	1	NOTCH3	FC-ECM
0.748899	-0.393933	0.187	0.211	1	ITGAE	FC-ECM
0.761547	-0.401781	0.074	0.053	1	NLGN1	FC-ECM
0.761563	0.577963	0.173	0.158	1	CD74	FC-ECM
0.762239	0.186465	0.364	0.316	1	MET	FC-ECM
0.777334	-0.123794	0.25	0.211	1	PLXNA1	FC-ECM
0.782196	-0.554232	0.263	0.263	1	IL4R	FC-ECM
0.804135	-0.115483	0.737	0.737	1	EGFR	FC-ECM
0.805948	-0.179256	0.379	0.368	1	PLXNA3	FC-ECM
0.826459	-0.609218	0.204	0.211	1	LIFR	FC-ECM
0.839778	-0.312571	0.065	0.053	1	PLXNB1	FC-ECM
0.842199	-0.181738	0.088	0.105	1	GHR	FC-ECM
0.846918	0.10809	0.325	0.316	1	NECTIN2	FC-ECM
0.866629	-0.216831	0.09	0.105	1	FZD2	FC-ECM
0.881852	-0.256655	0.207	0.211	1	TNFRSF9	FC-ECM
0.885546	-0.753307	0.102	0.105	1	SMO	FC-ECM
0.892538	-0.117936	0.289	0.263	1	DAG1	FC-ECM
0.897732	-1.26517	0.048	0.053	1	CADM3	FC-ECM
0.912127	-0.599298	0.047	0.053	1	IL3RA	FC-ECM
0.93227	-0.691214	0.121	0.105	1	SSTR2	FC-ECM
0.948611	0.12559	0.054	0.053	1	GFRA2	FC-ECM
0.989369	-0.284042	0.109	0.105	1	ITGB2	FC-ECM
0.994362	-0.133667	0.159	0.158	1	TNFRSF14	FC-ECM
9.21489e-09	-6.17708	0	0.083	0.000233939	PTCH2	Proliferating_G2M
9.21489e-09	-6.17708	0	0.083	0.000233939	ITGAM	Proliferating_G2M
0.000354314	-1.85852	0.196	0.583	1	LRP6	Proliferating_G2M
0.00188993	-4.00966	0.005	0.083	1	TEK	Proliferating_G2M
0.00321041	1.39478	0.754	0.333	1	CD55	Proliferating_G2M
0.00666345	-0.628875	0.822	1	1	IL6ST	Proliferating_G2M
0.0109091	-0.830002	0.603	0.833	1	TNFRSF1A	Proliferating_G2M
0.016572	-1.16812	0.394	0.667	1	ADIPOR2	Proliferating_G2M
0.018163	-1.56946	0.108	0.333	1	TNFRSF9	Proliferating_G2M
0.020224	1.01363	0.754	0.5	1	ACKR3	Proliferating_G2M
0.0205554	-0.572042	0.761	0.833	1	IFNGR2	Proliferating_G2M
0.0217033	-4.16171	0.01	0.083	1	HCST	Proliferating_G2M
0.0294167	1.58382	0.43	0.083	1	IL4R	Proliferating_G2M
0.0321843	-0.908528	0.442	0.667	1	JAM3	Proliferating_G2M
0.0380854	-1.86036	0.08	0.25	1	PTCH1	Proliferating_G2M
0.0418752	-2.54798	0.088	0.25	1	IL18R1	Proliferating_G2M
0.0420825	-4.00286	0.013	0.083	1	OXTR	Proliferating_G2M
0.046023	-1.19202	0.344	0.583	1	ICAM1	Proliferating_G2M
0.0495223	-2.75408	0.045	0.167	1	MCAM	Proliferating_G2M
0.0521647	1.62799	0.432	0.167	1	IL13RA2	Proliferating_G2M
0.0686136	-1.36716	0.206	0.417	1	IL15RA	Proliferating_G2M
0.0692305	1.24006	0.48	0.25	1	FAS	Proliferating_G2M
0.0775102	2.03598	0.211	0	1	JAM2	Proliferating_G2M
0.0775355	0.61775	0.796	0.5	1	BDKRB2	Proliferating_G2M
0.0873378	-0.756262	0.349	0.583	1	NTRK2	Proliferating_G2M
0.0873629	-0.456892	0.724	0.917	1	NOTCH2	Proliferating_G2M
0.0926902	-1.44221	0.161	0.333	1	IFNAR2	Proliferating_G2M
0.0926997	-0.158222	0.972	0.917	1	CD99	Proliferating_G2M
0.0987023	-3.6744	0.018	0.083	1	MPZ	Proliferating_G2M
0.116682	1.89622	0.173	0	1	CD74	Proliferating_G2M
0.11737	0.199863	0.799	0.583	1	TNFRSF11B	Proliferating_G2M
0.118998	-0.312698	0.952	1	1	NRP2	Proliferating_G2M
0.121841	1.59267	0.274	0.083	1	ITGA2	Proliferating_G2M
0.126418	1.70471	0.166	0	1	TNFRSF10A	Proliferating_G2M
0.133323	1.54166	0.161	0	1	CNTNAP1	Proliferating_G2M
0.145451	0.966349	0.284	0.083	1	PTPRM	Proliferating_G2M
0.15075	-2.27973	0.02	0.083	1	KDR	Proliferating_G2M
0.154086	0.859075	0.289	0.083	1	SDC3	Proliferating_G2M
0.155634	0.727409	0.487	0.25	1	ITGA1	Proliferating_G2M
0.160377	1.44214	0.143	0	1	EPHB2	Proliferating_G2M
0.164709	-1.49187	0.211	0.333	1	ITGA10	Proliferating_G2M
0.167185	-1.29801	0.123	0.25	1	ITGA6	Proliferating_G2M
0.170857	-3.04631	0.023	0.083	1	F2R	Proliferating_G2M
0.173766	-2.6184	0.023	0.083	1	IL27RA	Proliferating_G2M
0.177623	-0.516726	0.417	0.667	1	DAG1	Proliferating_G2M
0.177752	0.735371	0.49	0.25	1	PDGFRB	Proliferating_G2M
0.192391	-0.750431	0.347	0.5	1	PLXNA3	Proliferating_G2M
0.192622	1.13688	0.126	0	1	IL1RAP	Proliferating_G2M
0.192622	1.37084	0.126	0	1	NPR3	Proliferating_G2M
0.202395	-0.518911	0.523	0.667	1	TGFBR1	Proliferating_G2M
0.207539	-0.460173	0.653	0.833	1	IGF2R	Proliferating_G2M
0.208122	-2.71447	0.025	0.083	1	CCR10	Proliferating_G2M
0.212499	-0.261737	0.902	0.917	1	ITGA5	Proliferating_G2M
0.221173	-2.199	0.025	0.083	1	EPHB1	Proliferating_G2M
0.222261	-0.642155	0.191	0.333	1	NOTCH3	Proliferating_G2M
0.22339	-0.974116	0.312	0.417	1	IL7R	Proliferating_G2M
0.231293	-0.203769	0.917	0.917	1	PDGFRA	Proliferating_G2M
0.237327	0.919559	0.106	0	1	FZD10	Proliferating_G2M
0.251034	0.440478	0.671	0.5	1	PLXNB2	Proliferating_G2M
0.256694	0.879295	0.098	0	1	IL6R	Proliferating_G2M
0.270517	0.809264	0.093	0	1	FZD4	Proliferating_G2M
0.270985	-1.91918	0.028	0.083	1	NCAM2	Proliferating_G2M
0.271078	-0.536866	0.492	0.583	1	TGFBR2	Proliferating_G2M
0.281895	-0.353245	0.764	0.917	1	IL13RA1	Proliferating_G2M
0.290024	0.884283	0.201	0.083	1	ADORA2B	Proliferating_G2M
0.299748	0.314904	0.714	0.75	1	TNFRSF12A	Proliferating_G2M
0.299872	-0.755994	0.307	0.417	1	ACVR1	Proliferating_G2M
0.300614	1.0714	0.083	0	1	ITGA8	Proliferating_G2M
0.310066	-0.638662	0.432	0.5	1	CADM1	Proliferating_G2M
0.317025	0.311538	0.078	0	1	FZD3	Proliferating_G2M
0.317025	0.250257	0.078	0	1	NPR2	Proliferating_G2M
0.318241	-2.81185	0.033	0.083	1	CDH2	Proliferating_G2M
0.325607	0.704567	0.075	0	1	IL1RL1	Proliferating_G2M
0.325607	0.384905	0.075	0	1	NCAM1	Proliferating_G2M
0.329882	0.710696	0.191	0.083	1	EPHB4	Proliferating_G2M
0.333203	0.56468	0.209	0.083	1	IGF1R	Proliferating_G2M
0.333723	-2.17181	0.033	0.083	1	IL20RA	Proliferating_G2M
0.334454	0.421809	0.073	0	1	CHRNB1	Proliferating_G2M
0.350023	0.422167	0.583	0.417	1	CDH11	Proliferating_G2M
0.351333	0.343918	0.417	0.25	1	BMPR2	Proliferating_G2M
0.36269	0.74754	0.181	0.083	1	ACVR1B	Proliferating_G2M
0.362727	0.245862	0.065	0	1	ITGB3	Proliferating_G2M
0.372779	0.158459	0.063	0	1	EPHB3	Proliferating_G2M
0.378389	-0.718573	0.156	0.25	1	NLGN1	Proliferating_G2M
0.379931	-0.236548	0.849	0.833	1	ITGB5	Proliferating_G2M
0.380551	0.683138	0.181	0.083	1	DSG2	Proliferating_G2M
0.383172	0.178543	0.06	0	1	SORT1	Proliferating_G2M
0.383172	0.187606	0.06	0	1	PTH1R	Proliferating_G2M
0.405068	0.132197	0.055	0	1	PECAM1	Proliferating_G2M
0.414896	0.56916	0.266	0.167	1	FZD7	Proliferating_G2M
0.416398	-0.282039	0.729	0.833	1	SDC2	Proliferating_G2M
0.421816	-1.85027	0.038	0.083	1	GPR37L1	Proliferating_G2M
0.428601	-0.417288	0.05	0	1	PLXNA2	Proliferating_G2M
0.433393	0.443485	0.266	0.167	1	LEPR	Proliferating_G2M
0.437351	-2.17858	0.04	0.083	1	FGFR2	Proliferating_G2M
0.437351	-2.22389	0.04	0.083	1	PLXNC1	Proliferating_G2M
0.437534	0.35659	0.452	0.333	1	INSR	Proliferating_G2M
0.438565	-0.4513	0.48	0.5	1	NECTIN2	Proliferating_G2M
0.44167	0.272854	0.653	0.583	1	MPZL1	Proliferating_G2M
0.450765	0.659087	0.251	0.167	1	PLXNA4	Proliferating_G2M
0.451623	-0.431914	0.513	0.583	1	IL1R1	Proliferating_G2M
0.460524	-0.565628	0.259	0.333	1	LRP5	Proliferating_G2M
0.47631	-1.66894	0.04	0.083	1	CD34	Proliferating_G2M
0.48532	-0.168606	0.173	0.083	1	LIFR	Proliferating_G2M
0.488964	-0.291926	0.367	0.5	1	NRP1	Proliferating_G2M
0.490473	-1.74867	0.043	0.083	1	SELL	Proliferating_G2M
0.494211	-1.32765	0.111	0.167	1	ITGA3	Proliferating_G2M
0.494865	-1.47256	0.043	0.083	1	FLT1	Proliferating_G2M
0.498723	-0.815514	0.103	0.167	1	EPHA2	Proliferating_G2M
0.501461	0.1696	0.817	0.75	1	CD47	Proliferating_G2M
0.504469	0.253025	0.608	0.5	1	CD99L2	Proliferating_G2M
0.506927	0.433132	0.148	0.083	1	PLXND1	Proliferating_G2M
0.525083	0.436698	0.229	0.167	1	CAP1	Proliferating_G2M
0.540173	0.180138	0.492	0.333	1	FZD1	Proliferating_G2M
0.549109	0.252793	0.688	0.583	1	ITGAV	Proliferating_G2M
0.569199	-0.602774	0.379	0.417	1	ITGA11	Proliferating_G2M
0.573523	0.336034	0.312	0.25	1	IL17RA	Proliferating_G2M
0.573711	0.150828	0.354	0.25	1	CMKLR1	Proliferating_G2M
0.585305	-0.36751	0.246	0.333	1	IL17RC	Proliferating_G2M
0.58868	0.265959	0.638	0.667	1	FZD8	Proliferating_G2M
0.591699	0.143047	0.136	0.083	1	EDA2R	Proliferating_G2M
0.603428	-0.154259	0.648	0.667	1	VCAM1	Proliferating_G2M
0.605527	-0.197835	0.653	0.667	1	TNFRSF1B	Proliferating_G2M
0.620494	-1.43601	0.05	0.083	1	GHR	Proliferating_G2M
0.64272	-0.302554	0.138	0.083	1	NOTCH1	Proliferating_G2M
0.66539	-0.139907	0.829	0.917	1	OSMR	Proliferating_G2M
0.679298	-0.806184	0.209	0.25	1	FZD2	Proliferating_G2M
0.680962	-0.784364	0.133	0.167	1	CD274	Proliferating_G2M
0.681655	-0.80571	0.131	0.167	1	NECTIN1	Proliferating_G2M
0.691769	-1.96925	0.06	0.083	1	ERBB2	Proliferating_G2M
0.692113	-0.875688	0.214	0.25	1	CD40	Proliferating_G2M
0.696747	0.287122	0.118	0.083	1	CXCR4	Proliferating_G2M
0.701127	0.138969	0.307	0.25	1	EPOR	Proliferating_G2M
0.702976	-1.20212	0.055	0.083	1	ACVR2A	Proliferating_G2M
0.706422	0.168643	0.45	0.417	1	ALCAM	Proliferating_G2M
0.707714	-0.113607	0.721	0.75	1	EGFR	Proliferating_G2M
0.721176	-0.708175	0.133	0.167	1	ADORA1	Proliferating_G2M
0.734317	-0.688988	0.337	0.333	1	MET	Proliferating_G2M
0.81228	-1.12317	0.068	0.083	1	ACVR2B	Proliferating_G2M
0.813417	-0.699805	0.151	0.167	1	BMPR1A	Proliferating_G2M
0.821555	-0.605145	0.111	0.083	1	FZD6	Proliferating_G2M
0.840147	-0.192092	0.098	0.083	1	TYRO3	Proliferating_G2M
0.844571	-0.319611	0.548	0.5	1	NEGR1	Proliferating_G2M
0.854616	-0.32106	0.234	0.25	1	PARD3	Proliferating_G2M
0.862483	-0.147685	0.882	0.917	1	LRP1	Proliferating_G2M
0.878016	-0.120571	0.322	0.333	1	SDC1	Proliferating_G2M
0.9423	-1.60313	0.083	0.083	1	SSTR2	Proliferating_G2M
0.943593	-0.746195	0.08	0.083	1	ITGB2	Proliferating_G2M
0.959322	-1.45594	0.095	0.083	1	SMO	Proliferating_G2M
0.974205	-0.785472	0.09	0.083	1	CD4	Proliferating_G2M
0.985365	-0.411511	0.08	0.083	1	TLR4	Proliferating_G2M
0.989588	-0.259752	0.352	0.333	1	SV2A	Proliferating_G2M
0.995981	-0.744729	0.088	0.083	1	AGTR1	Proliferating_G2M
0.998015	-1.47108	0.09	0.083	1	PILRA	Proliferating_G2M

## Sheet: ST4_Treatability
cell_type	receptor_richness	protein_cargo_match	mirna_target_expr	communication_involvement	composite_score
Endothelial	1	1	0.36278	1	0.840695
FC-Regulatory	0.473358	0.944175	1	0.659259	0.769198
Macrophage	0.88513	0.870425	0.154079	0.899259	0.702223
FC-ECM	0.487505	0.968275	0.524033	0.595556	0.643842
Stem_Progenitor	0.841767	0	0.622091	0.902222	0.59152
FC-Inflammatory	0.183774	0.808447	0.559498	0.576296	0.532004
OuterZone_FC	0.647371	0	0.923235	0.293333	0.465985
Meniscus_Progenitor	0.445366	0	0.957863	0.45037	0.4634
Smooth_Muscle	0.403584	0	0.853746	0.32	0.394333
Proliferating_M	0.212621	0	0.684165	0.499259	0.349011
Proliferating_G2M	0.162798	0	0.39024	0.811852	0.341222
Secretory_Chondrocyte	0.145596	0	0.50067	0.714074	0.340085
Male_Inflammatory	0.257748	0	0.217487	0.792593	0.316957
Proliferating_S	0.0275495	0	0.333352	0.865185	0.306522
FC-Metabolic	0	0.777157	0.284942	0.131852	0.298488
Hypertrophic_Chondrocyte	0.28117	0	0.249378	0.426667	0.239304
FC-Degenerated	0.122553	0.794648	0	0	0.2293

## Sheet: ST5_Repair_Map
Pathway	Cargo	Receptor
TGFb	TGFB1	TGFbR1_R2
TGFb	TGFB3	TGFbR1_R2
TGFb	TGFB1	ACVR1B_TGFbR2
TGFb	TGFB1	ACVR1C_TGFbR2
TGFb	TGFB3	ACVR1B_TGFbR2
TGFb	TGFB3	ACVR1C_TGFbR2
TGFb	TGFB1	ACVR1_TGFbR
TGFb	TGFB3	ACVR1_TGFbR
BMP	BMP2	BMPR1A_ACVR2A
BMP	BMP2	BMPR1A_ACVR2B
BMP	BMP2	BMPR1A_BMPR2
BMP	BMP2	BMPR1B_ACVR2A
BMP	BMP2	BMPR1B_ACVR2B
BMP	BMP2	BMPR1B_BMPR2
ncWNT	WNT5A	FZD1
ncWNT	WNT5A	FZD10
ncWNT	WNT5A	FZD2
ncWNT	WNT5A	FZD3
ncWNT	WNT5A	FZD4
ncWNT	WNT5A	FZD5
ncWNT	WNT5A	FZD6
ncWNT	WNT5A	FZD7
ncWNT	WNT5A	FZD8
ncWNT	WNT5A	FZD9
ncWNT	WNT5A	MCAM
FGF	FGF2	FGFR1
FGF	FGF2	FGFR2
FGF	FGF2	FGFR3
PDGF	PDGFB	PDGFRA
PDGF	PDGFB	PDGFRB
VEGF	VEGFA	FLT1
VEGF	VEGFA	KDR
VEGF	VEGFA	FLT1_KDR
IGF	IGF1	IGF1R
IGF	IGF1	ITGAV_ITGB3
IGF	IGF1	ITGA6_ITGB4
CCL	CCL2	ACKR1
CCL	CCL2	ACKR2
CXCL	CXCL12	CXCR4
CXCL	CXCL12	ACKR3
IL10	IL10	IL10RA_IL10RB
HGF	HGF	MET
ANNEXIN	ANXA1	FPR2
ANNEXIN	ANXA1	FPR1
COLLAGEN	COL1A1	ITGA1_ITGB1
COLLAGEN	COL1A1	ITGA2_ITGB1
FN1	FN1	ITGA3_ITGB1
FN1	FN1	ITGA4_ITGB1
FN1	FN1	ITGA5_ITGB1
FN1	FN1	ITGA8_ITGB1
COLLAGEN	COL1A1	ITGA3_ITGB1
COLLAGEN	COL1A1	ITGA9_ITGB1
COLLAGEN	COL1A1	ITGA10_ITGB1
COLLAGEN	COL1A1	ITGA11_ITGB1
FN1	FN1	ITGAV_ITGB1
FN1	FN1	ITGAV_ITGB3
FN1	FN1	ITGA2B_ITGB3
FN1	FN1	ITGAV_ITGB6
FN1	FN1	ITGAV_ITGB8
COLLAGEN	COL1A1	ITGAV_ITGB8
FN1	FN1	CD44
COLLAGEN	COL1A1	CD44
COLLAGEN	COL1A1	SDC1
FN1	FN1	SDC1
COLLAGEN	COL1A1	SDC4
FN1	FN1	SDC4
COLLAGEN	COL1A1	GP6
ANXA1	ANXA1	FPR2_LXA4
VCAM	ITGB1	VCAM1

## Sheet: ST6_Comm_Repair
Pathway	Cargo_Ligand	Target_Receptor	Sender_CellType	Receiver_CellType	Original_Strength
TGFb	TGFB1	TGFbR1,R2	Exosome(Virtual)	All_expressing_receptor	1
TGFb	TGFB3	TGFbR1,R2	Exosome(Virtual)	All_expressing_receptor	1
TGFb	TGFB1	ACVR1B,TGFbR2	Exosome(Virtual)	All_expressing_receptor	1
TGFb	TGFB1	ACVR1C,TGFbR2	Exosome(Virtual)	All_expressing_receptor	1
TGFb	TGFB3	ACVR1B,TGFbR2	Exosome(Virtual)	All_expressing_receptor	1
TGFb	TGFB3	ACVR1C,TGFbR2	Exosome(Virtual)	All_expressing_receptor	1
TGFb	TGFB1	ACVR1,TGFbR	Exosome(Virtual)	All_expressing_receptor	1
TGFb	TGFB3	ACVR1,TGFbR	Exosome(Virtual)	All_expressing_receptor	1
BMP	BMP2	BMPR1A,ACVR2A	Exosome(Virtual)	All_expressing_receptor	1
BMP	BMP2	BMPR1A,ACVR2B	Exosome(Virtual)	All_expressing_receptor	1
BMP	BMP2	BMPR1A,BMPR2	Exosome(Virtual)	All_expressing_receptor	1
BMP	BMP2	BMPR1B,ACVR2A	Exosome(Virtual)	All_expressing_receptor	1
BMP	BMP2	BMPR1B,ACVR2B	Exosome(Virtual)	All_expressing_receptor	1
BMP	BMP2	BMPR1B,BMPR2	Exosome(Virtual)	All_expressing_receptor	1
ncWNT	WNT5A	FZD1	Exosome(Virtual)	All_expressing_receptor	1
ncWNT	WNT5A	FZD10	Exosome(Virtual)	All_expressing_receptor	1
ncWNT	WNT5A	FZD2	Exosome(Virtual)	All_expressing_receptor	1
ncWNT	WNT5A	FZD3	Exosome(Virtual)	All_expressing_receptor	1
ncWNT	WNT5A	FZD4	Exosome(Virtual)	All_expressing_receptor	1
ncWNT	WNT5A	FZD5	Exosome(Virtual)	All_expressing_receptor	1
ncWNT	WNT5A	FZD6	Exosome(Virtual)	All_expressing_receptor	1
ncWNT	WNT5A	FZD7	Exosome(Virtual)	All_expressing_receptor	1
ncWNT	WNT5A	FZD8	Exosome(Virtual)	All_expressing_receptor	1
ncWNT	WNT5A	FZD9	Exosome(Virtual)	All_expressing_receptor	1
ncWNT	WNT5A	MCAM	Exosome(Virtual)	All_expressing_receptor	1
FGF	FGF2	FGFR1	Exosome(Virtual)	All_expressing_receptor	1
FGF	FGF2	FGFR2	Exosome(Virtual)	All_expressing_receptor	1
FGF	FGF2	FGFR3	Exosome(Virtual)	All_expressing_receptor	1
PDGF	PDGFB	PDGFRA	Exosome(Virtual)	All_expressing_receptor	1
PDGF	PDGFB	PDGFRB	Exosome(Virtual)	All_expressing_receptor	1
VEGF	VEGFA	FLT1	Exosome(Virtual)	All_expressing_receptor	1
VEGF	VEGFA	KDR	Exosome(Virtual)	All_expressing_receptor	1
VEGF	VEGFA	FLT1,KDR	Exosome(Virtual)	All_expressing_receptor	1
IGF	IGF1	IGF1R	Exosome(Virtual)	All_expressing_receptor	1
IGF	IGF1	ITGAV,ITGB3	Exosome(Virtual)	All_expressing_receptor	1
IGF	IGF1	ITGA6,ITGB4	Exosome(Virtual)	All_expressing_receptor	1
CCL	CCL2	ACKR1	Exosome(Virtual)	All_expressing_receptor	1
CCL	CCL2	ACKR2	Exosome(Virtual)	All_expressing_receptor	1
CXCL	CXCL12	CXCR4	Exosome(Virtual)	All_expressing_receptor	1
CXCL	CXCL12	ACKR3	Exosome(Virtual)	All_expressing_receptor	1
IL10	IL10	IL10RA,IL10RB	Exosome(Virtual)	All_expressing_receptor	1
HGF	HGF	MET	Exosome(Virtual)	All_expressing_receptor	1
ANNEXIN	ANXA1	FPR2	Exosome(Virtual)	All_expressing_receptor	1
ANNEXIN	ANXA1	FPR1	Exosome(Virtual)	All_expressing_receptor	1
COLLAGEN	COL1A1	ITGA1,ITGB1	Exosome(Virtual)	All_expressing_receptor	1
COLLAGEN	COL1A1	ITGA2,ITGB1	Exosome(Virtual)	All_expressing_receptor	1
FN1	FN1	ITGA3,ITGB1	Exosome(Virtual)	All_expressing_receptor	1
FN1	FN1	ITGA4,ITGB1	Exosome(Virtual)	All_expressing_receptor	1
FN1	FN1	ITGA5,ITGB1	Exosome(Virtual)	All_expressing_receptor	1
FN1	FN1	ITGA8,ITGB1	Exosome(Virtual)	All_expressing_receptor	1
COLLAGEN	COL1A1	ITGA3,ITGB1	Exosome(Virtual)	All_expressing_receptor	1
COLLAGEN	COL1A1	ITGA9,ITGB1	Exosome(Virtual)	All_expressing_receptor	1
COLLAGEN	COL1A1	ITGA10,ITGB1	Exosome(Virtual)	All_expressing_receptor	1
COLLAGEN	COL1A1	ITGA11,ITGB1	Exosome(Virtual)	All_expressing_receptor	1
FN1	FN1	ITGAV,ITGB1	Exosome(Virtual)	All_expressing_receptor	1
FN1	FN1	ITGAV,ITGB3	Exosome(Virtual)	All_expressing_receptor	1
FN1	FN1	ITGA2B,ITGB3	Exosome(Virtual)	All_expressing_receptor	1
FN1	FN1	ITGAV,ITGB6	Exosome(Virtual)	All_expressing_receptor	1
FN1	FN1	ITGAV,ITGB8	Exosome(Virtual)	All_expressing_receptor	1
COLLAGEN	COL1A1	ITGAV,ITGB8	Exosome(Virtual)	All_expressing_receptor	1
FN1	FN1	CD44	Exosome(Virtual)	All_expressing_receptor	1
COLLAGEN	COL1A1	CD44	Exosome(Virtual)	All_expressing_receptor	1
COLLAGEN	COL1A1	SDC1	Exosome(Virtual)	All_expressing_receptor	1
FN1	FN1	SDC1	Exosome(Virtual)	All_expressing_receptor	1
COLLAGEN	COL1A1	SDC4	Exosome(Virtual)	All_expressing_receptor	1
FN1	FN1	SDC4	Exosome(Virtual)	All_expressing_receptor	1
COLLAGEN	COL1A1	GP6	Exosome(Virtual)	All_expressing_receptor	1
ANXA1	ANXA1	FPR2,LXA4	Exosome(Virtual)	All_expressing_receptor	1
VCAM	ITGB1	VCAM1	Exosome(Virtual)	All_expressing_receptor	1

## Sheet: ST7_TF_Network
TF	Target	Correlation	Direction
SOX9	SOX9	1	Activation
JUN	VEGFA	0.326	Activation
JUN	PTGS2	0.233	Activation
FOS	COL1A1	0.212	Activation
JUN	COL1A1	0.211	Activation
NFKB2	PTGS2	0.201	Activation
SOX9	COL1A1	-0.178	Repression
HIF1A	PTGS2	0.176	Activation
JUN	PRG4	0.166	Activation
SMAD3	PTGS2	-0.163	Repression
RELA	PTGS2	0.159	Activation
NFKB2	PRG4	0.158	Activation
FOS	FGF2	-0.155	Repression
JUNB	COL1A1	0.155	Activation

## Sheet: ST8_Cargo_TF_Links
Cargo	Target_TF	Mechanism	Effect
TGFB1	SMAD2	TGFβ→SMAD2	Anti-degen
TGFB1	SMAD3	TGFβ→SMAD3	Anti-degen
TGFB3	SMAD3	TGFβ3→SMAD3	Anti-degen
BMP2	SMAD1	BMP→SMAD1	Repair
BMP2	SMAD5	BMP→SMAD5	Repair
WNT5A	JUN	WNT5A→AP1	Proliferation
WNT5A	CTNNB1	WNT→β-cat	Differentiation
IL10	STAT3	IL10→STAT3	Anti-inflam
HGF	MYC	HGF→MYC	Proliferation
FGF2	ETS1	FGF2→ETS1	Angiogenesis
IGF1	FOXO1	IGF1→FOXO1	Anti-apoptosis
ANXA1	NFKB1	ANXA1⊣NFκB	Anti-inflam
CXCL12	STAT3	CXCL12→STAT3	Migration
hsa-miR-146a-5p	NFKB1	miR-146a⊣TRAF6→NFκB	Anti-inflam
hsa-miR-21-5p	TP53	miR-21⊣PDCD4→p53	Anti-apoptosis
hsa-miR-140-5p	ADAMTS5	miR-140⊣ADAMTS5	Chondroprotection
hsa-miR-29a-3p	RUNX2	miR-29a→RUNX2	ECM regulation
hsa-miR-155-5p	SOCS1	miR-155→SOCS1	Immunomod
hsa-miR-181a-5p	TLR4	miR-181a⊣TLR4	Anti-inflam

## Sheet: ST9_MSC_Source
Source	Enriched_Proteins	Enriched_miRNAs	Therapeutic_Strength
Bone_Marrow	BMP2, BMP7, RUNX2, VEGFA, ANG1	hsa-miR-21-5p, hsa-miR-29a-3p, hsa-miR-199a-3p	骨和软骨修复
Adipose	HGF, IGF1, FGF2, IL10, TSG6	hsa-miR-146a-5p, hsa-miR-127-5p, hsa-miR-199a-3p	抗炎和免疫调节
Synovial	TGFB1, TGFB3, SOX9, COL2A1, PRG4	hsa-miR-140-5p, hsa-miR-140-3p, hsa-miR-320a	软骨分化和保护（与半月板同源性最高）
Umbilical_Cord	VEGFA, PDGFB, WNT3A, SHH, FGF2	hsa-miR-21-5p, hsa-miR-100-5p, hsa-miR-let-7a-5p	增殖和血管生成

[truncated: 4 more sheets: ST10_KEGG, ST11_GO_miRNA, ST12_Cargo_GO, ST13_TF_differential_activity]
