# Supplementary material
Source: Research Square preprint supplement (doi:10.21203/rs.3.rs-9484968/v1)
Supplement: Supplementary file 7 [file 553c59e7e16aba5b87c6b829.docx]

**Supplementary Information**

*Integrative single-cell and exosome multi-omics atlas reveals precision cargo–target interaction landscape for meniscus repair*

Shiyou Ren, Siyao Guan, Haiyang Yu & Wentao Zhang

This file contains Supplementary Figures 1–10 and Supplementary Tables 1–13.

# **Supplementary Figures**

**Supplementary Fig. 1 | Quality control and unsupervised clustering.** a, UMAP visualization of 6,759 meniscal cells colored by unsupervised cluster identity (Clusters 0–16, resolution 0.8). b, UMAP colored by sample condition (Normal vs Degenerated). Normal cells were identified by the N_ prefix and Degenerated cells by the O_ prefix in cell barcodes. (UMAP_clusters.pdf, UMAP_condition.pdf)

**Supplementary Fig. 2 | Pseudotime trajectory analysis of fibrochondrocyte degeneration.** a, Slingshot trajectory inference on UMAP embedding of fibrochondrocyte subpopulations (FC-Regulatory, FC-ECM, FC-Metabolic, FC-Inflammatory, FC-Degenerated, Secretory Chondrocyte, Hypertrophic Chondrocyte, OuterZone FC, Meniscus Progenitor). Black curves indicate inferred lineage paths from FC-Regulatory (root) toward degenerative endpoints. b, UMAP colored by pseudotime values (dark/purple = early, yellow/light = late pseudotime). c, Pseudotime density distribution comparing Normal (blue) and Degenerated (red) samples, confirming enrichment of degenerated cells in late pseudotime. (slingshot_trajectory.pdf, pseudotime_umap.pdf, pseudotime_condition_density.pdf)

**Supplementary Fig. 3 | Gene expression dynamics along the degeneration pseudotime.** Heatmap showing Z-score normalized expression of 21 key genes along pseudotime, ordered from early (left) to late (right) degeneration. Top annotation bar indicates pseudotime stage (Early, Early-Mid, Mid, Mid-Late, Late). Homeostatic genes (COL1A1, PRG4, TGFB3, SOX9) show high expression in early pseudotime, while catabolic genes (MMP13, IL33, GDF15, CD274) and signaling receptors (TGFBR1, FGFR1, BMPR1A) are upregulated in late pseudotime. Rows are hierarchically clustered. (gene_dynamics_heatmap.pdf)

**Supplementary Fig. 4 | Cell type composition and differentiation potential along pseudotime.** a, Stacked bar plot showing cell type composition across 10 equal-sized pseudotime bins (1 = earliest, 10 = latest). Early bins are dominated by FC-Regulatory and FC-ECM cells; late bins are enriched for FC-Degenerated, FC-Inflammatory, and Hypertrophic Chondrocyte. b, Box plot of differentiation potential (gene complexity score, normalized 0–1) across all 17 cell types. Proliferating cells and progenitor populations show the highest scores; FC-Degenerated and FC-Metabolic show the lowest, indicating terminal differentiation toward pathological states. (celltype_composition_pseudotime.pdf, differentiation_potential.pdf)

**Supplementary Fig. 5 | KEGG pathway enrichment of MSC exosome protein cargo.** Dot plot showing top 15 enriched KEGG pathways for the 56 exosomal proteins. Dot size indicates gene count; dot color indicates adjusted p-value. Top pathways include Proteoglycans in cancer (GeneRatio = 0.40), Integrin signaling (0.26), PI3K-Akt signaling (0.26), Focal adhesion (0.23), Regulation of actin cytoskeleton (0.23), and MAPK signaling (0.21). (cargo_KEGG_enrichment.pdf)

**Supplementary Fig. 6 | GO enrichment of exosomal miRNA targets.** Dot plot showing top 20 enriched Gene Ontology biological process terms for validated targets of the 30 exosomal miRNAs. Top terms include ossification (GeneRatio = 0.53), connective tissue development (0.42), mesenchyme development (0.42), epithelial-to-mesenchymal transition (0.37), cartilage development (0.37), and BMP signaling pathway (0.32). (miRNA_targets_GO.pdf)

**Supplementary Fig. 7 | Cell type-specific receptor fingerprint.** Heatmap showing Z-score normalized expression of 349 receptors from CellChatDB across 17 cell populations. Each column represents a cell type; each row represents a receptor. Hierarchical clustering reveals distinct receptor profiles: Macrophage shows enrichment for immune receptors (CSF1R, TLR4, TREM2); Endothelial for vascular receptors (KDR, FLT1, TEK); and fibrochondrocyte subtypes for ECM/growth factor receptors (ITGB1, TGFBR1, FGFR1). (receptor_fingerprint_heatmap.pdf)

**Supplementary Fig. 8 | Differentially expressed receptors between Normal and Degenerated conditions.** Volcano plot showing log2 fold change (x-axis) versus –log10(p-value) (y-axis) for 1,123 receptor expression changes across all cell types. Red dots: significantly upregulated in Degenerated (adjusted p < 0.05, log2FC > 0.5). Blue dots: significantly downregulated. Notable upregulated receptors include ALK in FC-Regulatory cells (adjusted p = 5.88 × 10⁻¹⁴). (receptor_volcano.pdf)

**Supplementary Fig. 9 | Treatability score analysis.** a, Horizontal bar plot showing composite treatability scores for all 17 cell types, ranked from highest (Endothelial: 0.84) to lowest (FC-Degenerated: 0.23). Dashed line indicates treatability threshold (0.5). b, Heatmap showing four-dimensional treatability score decomposition: receptor richness, protein cargo match, miRNA target expression, and communication involvement. Each dimension is normalized to 0–1. Right sidebar shows composite score. (treatability_barplot.pdf, treatability_decomposition.pdf)

**Supplementary Fig. 10 | Exosome cargo–transcription factor connections and CellChat pathway contributions.** a, Heatmap showing 19 mechanistic connections between exosome cargo molecules (rows) and therapeutic effects (columns) mediated through transcription factor targets. Cargo includes both proteins (TGFB1, BMP2, WNT5A, IL10, HGF, FGF2, IGF1, ANXA1, CXCL12) and miRNAs (miR-146a-5p, miR-21-5p, miR-140-5p, miR-29a-3p, miR-155-5p, miR-181a-5p). Effects span anti-degenerative, anti-inflammatory, repair, proliferation, differentiation, ECM regulation, immunomodulation, chondroprotection, migration, and angiogenesis categories. b, CellChat signaling pathway contribution analysis showing relative contribution of each ligand–receptor pair to the overall 67-pathway communication network. (cargo_TF_effect_heatmap.pdf, cellchat_pathway_contribution.pdf)

# **Supplementary Tables**

All supplementary tables are provided as sheets in the accompanying Excel file (5_Supplementary_Tables.xlsx).

**Supplementary Table 1.** MSC exosome cargo database. 56 proteins and 30 miRNAs with functional categories, validated targets, and MSC source annotations. [Sheet: ST1_Cargo_Database, ST1b_miRNA_Targets]

**Supplementary Table 2.** Cluster marker genes. 8,506 differentially expressed genes across all 17 clusters (Wilcoxon rank-sum test, min.pct = 0.25, logfc.threshold = 0.5). Columns: p_val, avg_log2FC, pct.1, pct.2, p_val_adj, cluster, gene. [Sheet: ST2_Cluster_Markers]

**Supplementary Table 3.** Differentially expressed receptors. 1,123 receptor expression changes between Normal and Degenerated conditions across cell types (349 receptors tested per cell type). [Sheet: ST3_DE_Receptors]

**Supplementary Table 4.** Cell type treatability scores. Composite scores for all 17 populations with four-dimensional decomposition: receptor richness, protein cargo match, miRNA target expression, and communication involvement. [Sheet: ST4_Treatability]

**Supplementary Table 5.** Exosome cargo–receptor–pathway repair map. 69 interaction pairs organized by signaling pathway, including cargo ligand and target receptor. [Sheet: ST5_Repair_Map]

**Supplementary Table 6.** Exosome communication repair map with cell type specificity. 69 pairs with sender cell type, receiver cell type, and original signaling strength. [Sheet: ST6_Comm_Repair]

**Supplementary Table 7.** Transcription factor–target gene regulatory network. 14 significant correlations (|Spearman r| > 0.15) between TFs and target genes. [Sheet: ST7_TF_Network]

**Supplementary Table 8.** Exosome cargo–TF mechanistic connections. 19 cargo–TF links with signaling mechanism and therapeutic effect annotation. [Sheet: ST8_Cargo_TF_Links]

**Supplementary Table 9.** MSC source comparison. Enriched proteins, enriched miRNAs, and therapeutic strengths for bone marrow, adipose, synovial, and umbilical cord MSC-derived exosomes. [Sheet: ST9_MSC_Source]

**Supplementary Table 10.** KEGG pathway enrichment of exosome protein cargo. 73 enriched pathways with gene ratios, fold enrichment, and adjusted p-values. [Sheet: ST10_KEGG]

**Supplementary Table 11.** GO biological process enrichment of exosomal miRNA targets. 709 enriched GO terms. [Sheet: ST11_GO_miRNA]

**Supplementary Table 12.** GO biological process enrichment of exosomal protein cargo. 1,430 enriched GO terms. [Sheet: ST12_Cargo_GO]

**Supplementary Table 13.**Transcription factor differential activity. Log2 fold change (Degenerated vs Normal) for 44 transcription factors across 15 cell types (660 entries). Source data for Fig. 4a and Fig. 4b.[Sheet: ST13_TF_differential_activity]
