# Supplementary material
Source: Research Square preprint supplement (doi:10.21203/rs.3.rs-9484968/v1)

Cell Type-Specific Receptor Fingerprint

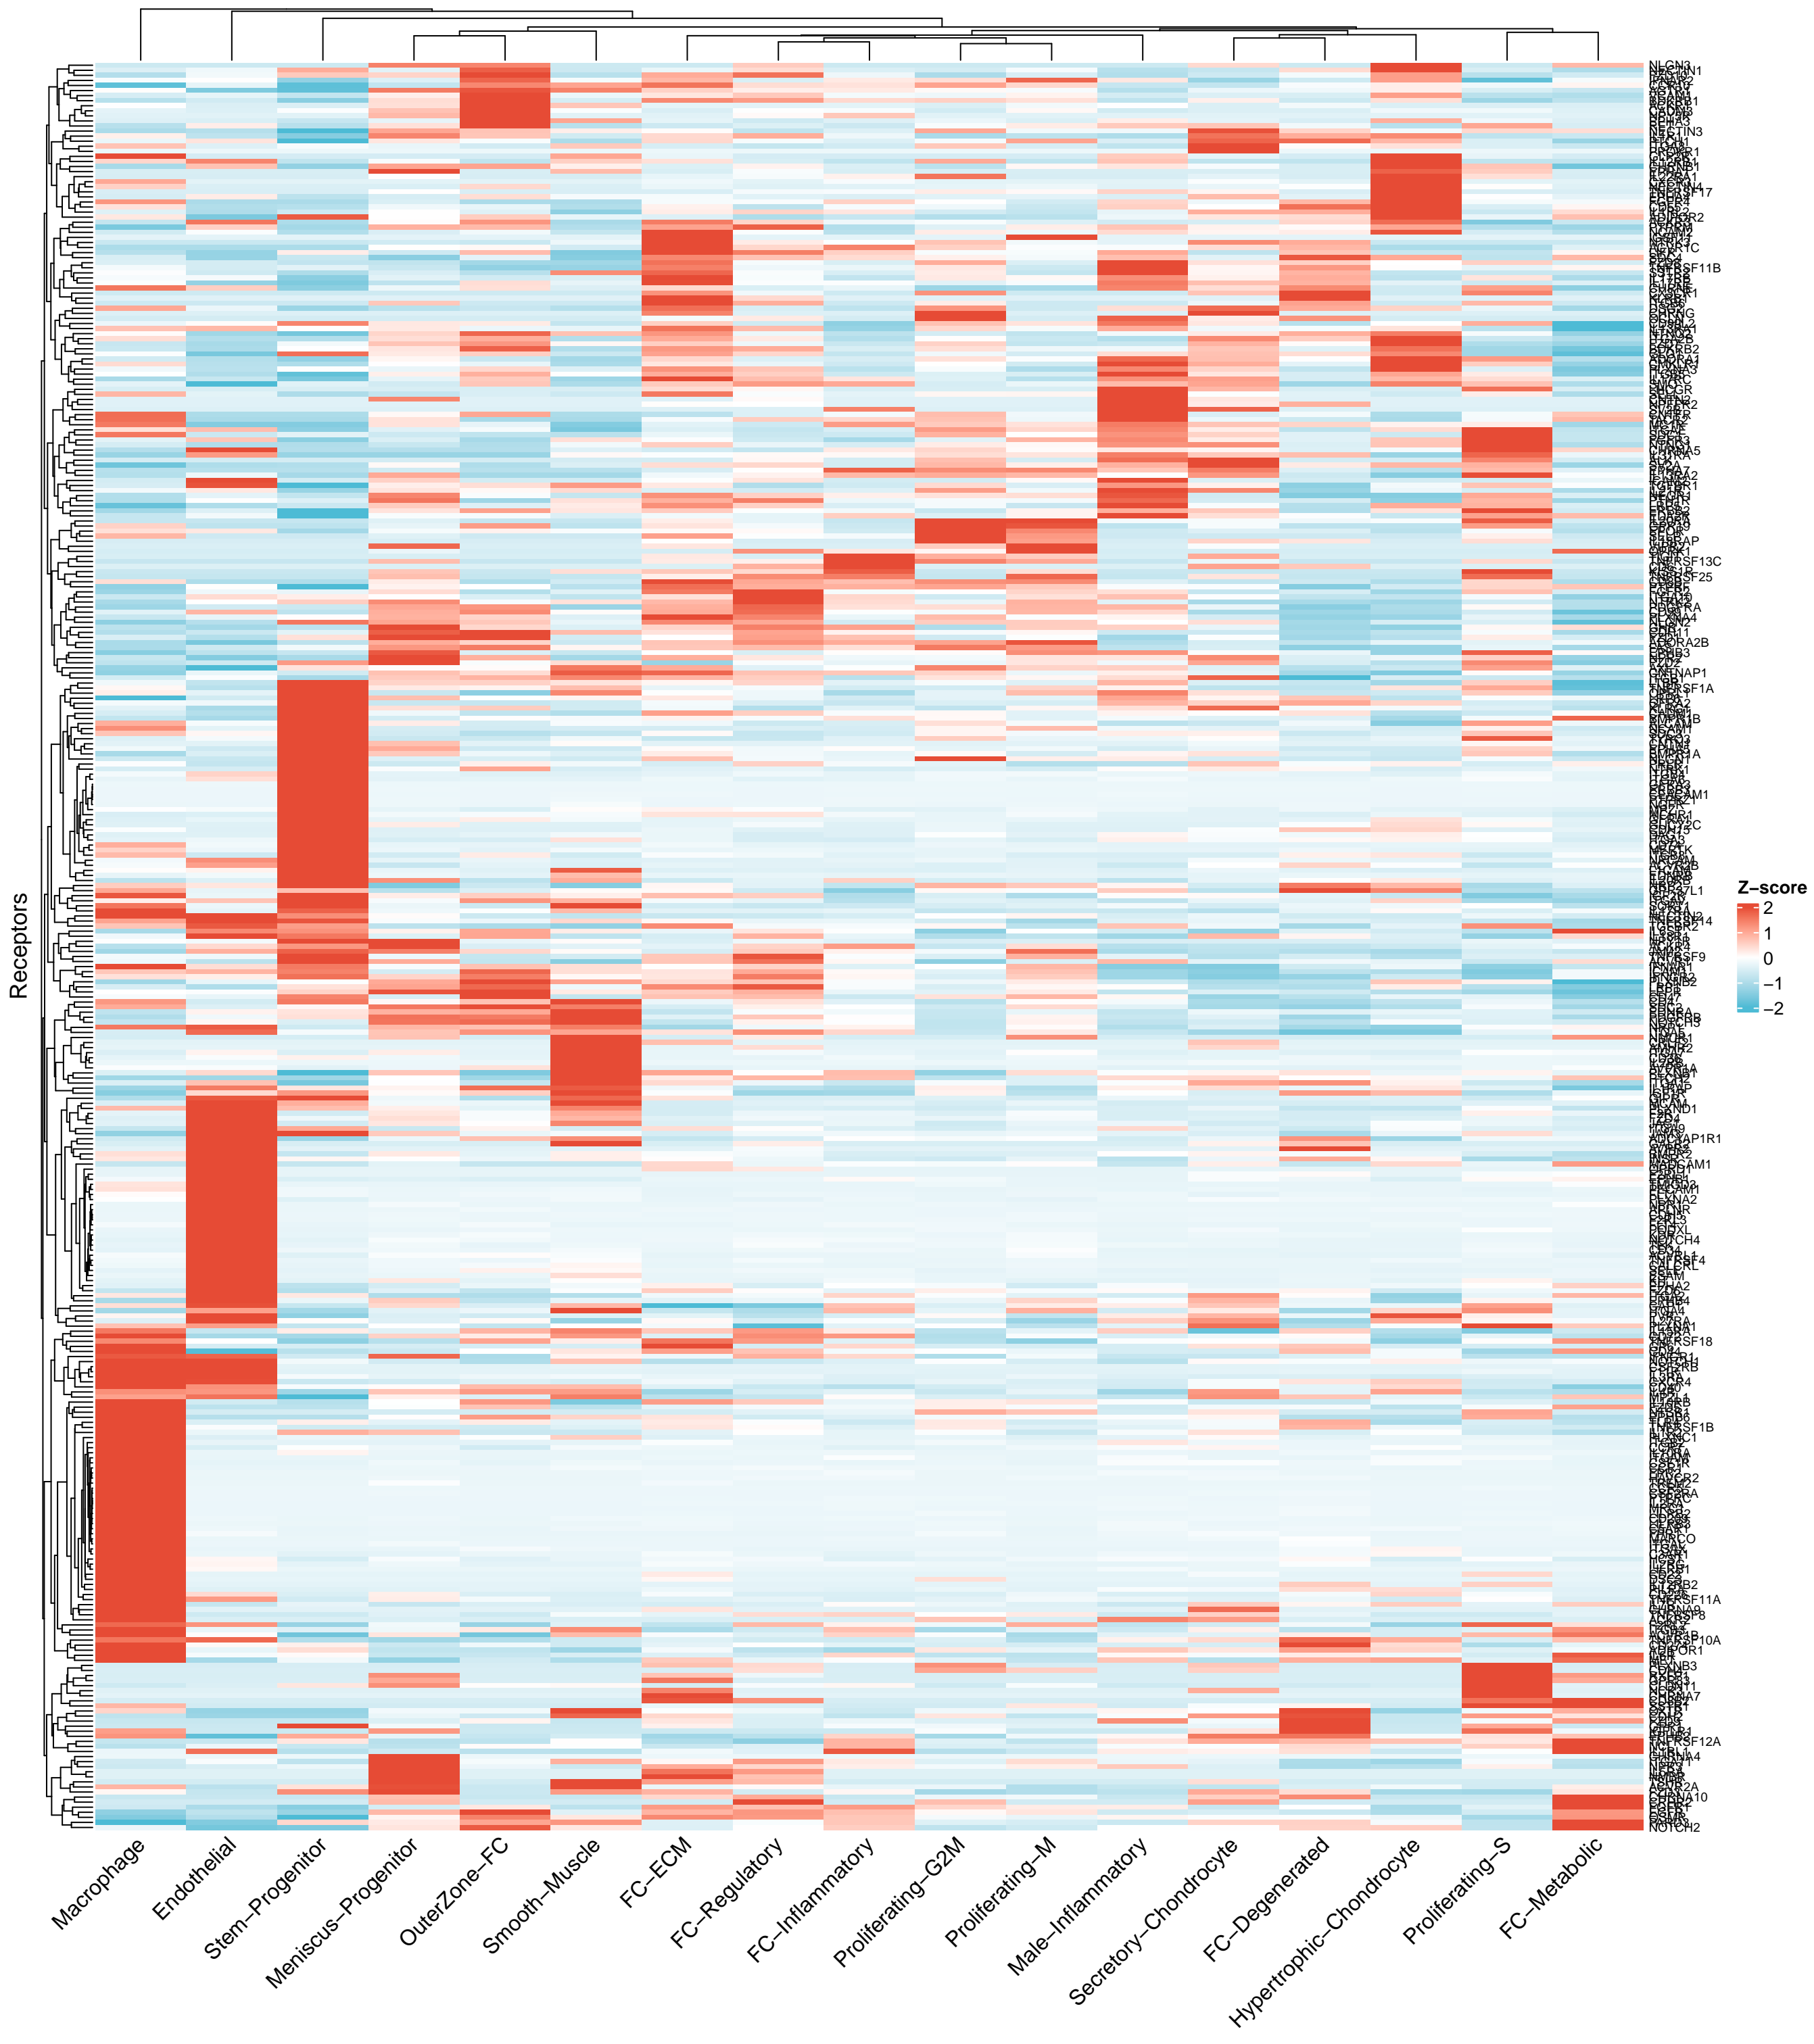

Supplement: Supplementary file 1 [file 01e9b77e33d81a26c9d1ffe6.pdf]

# Normal vs Degenerated

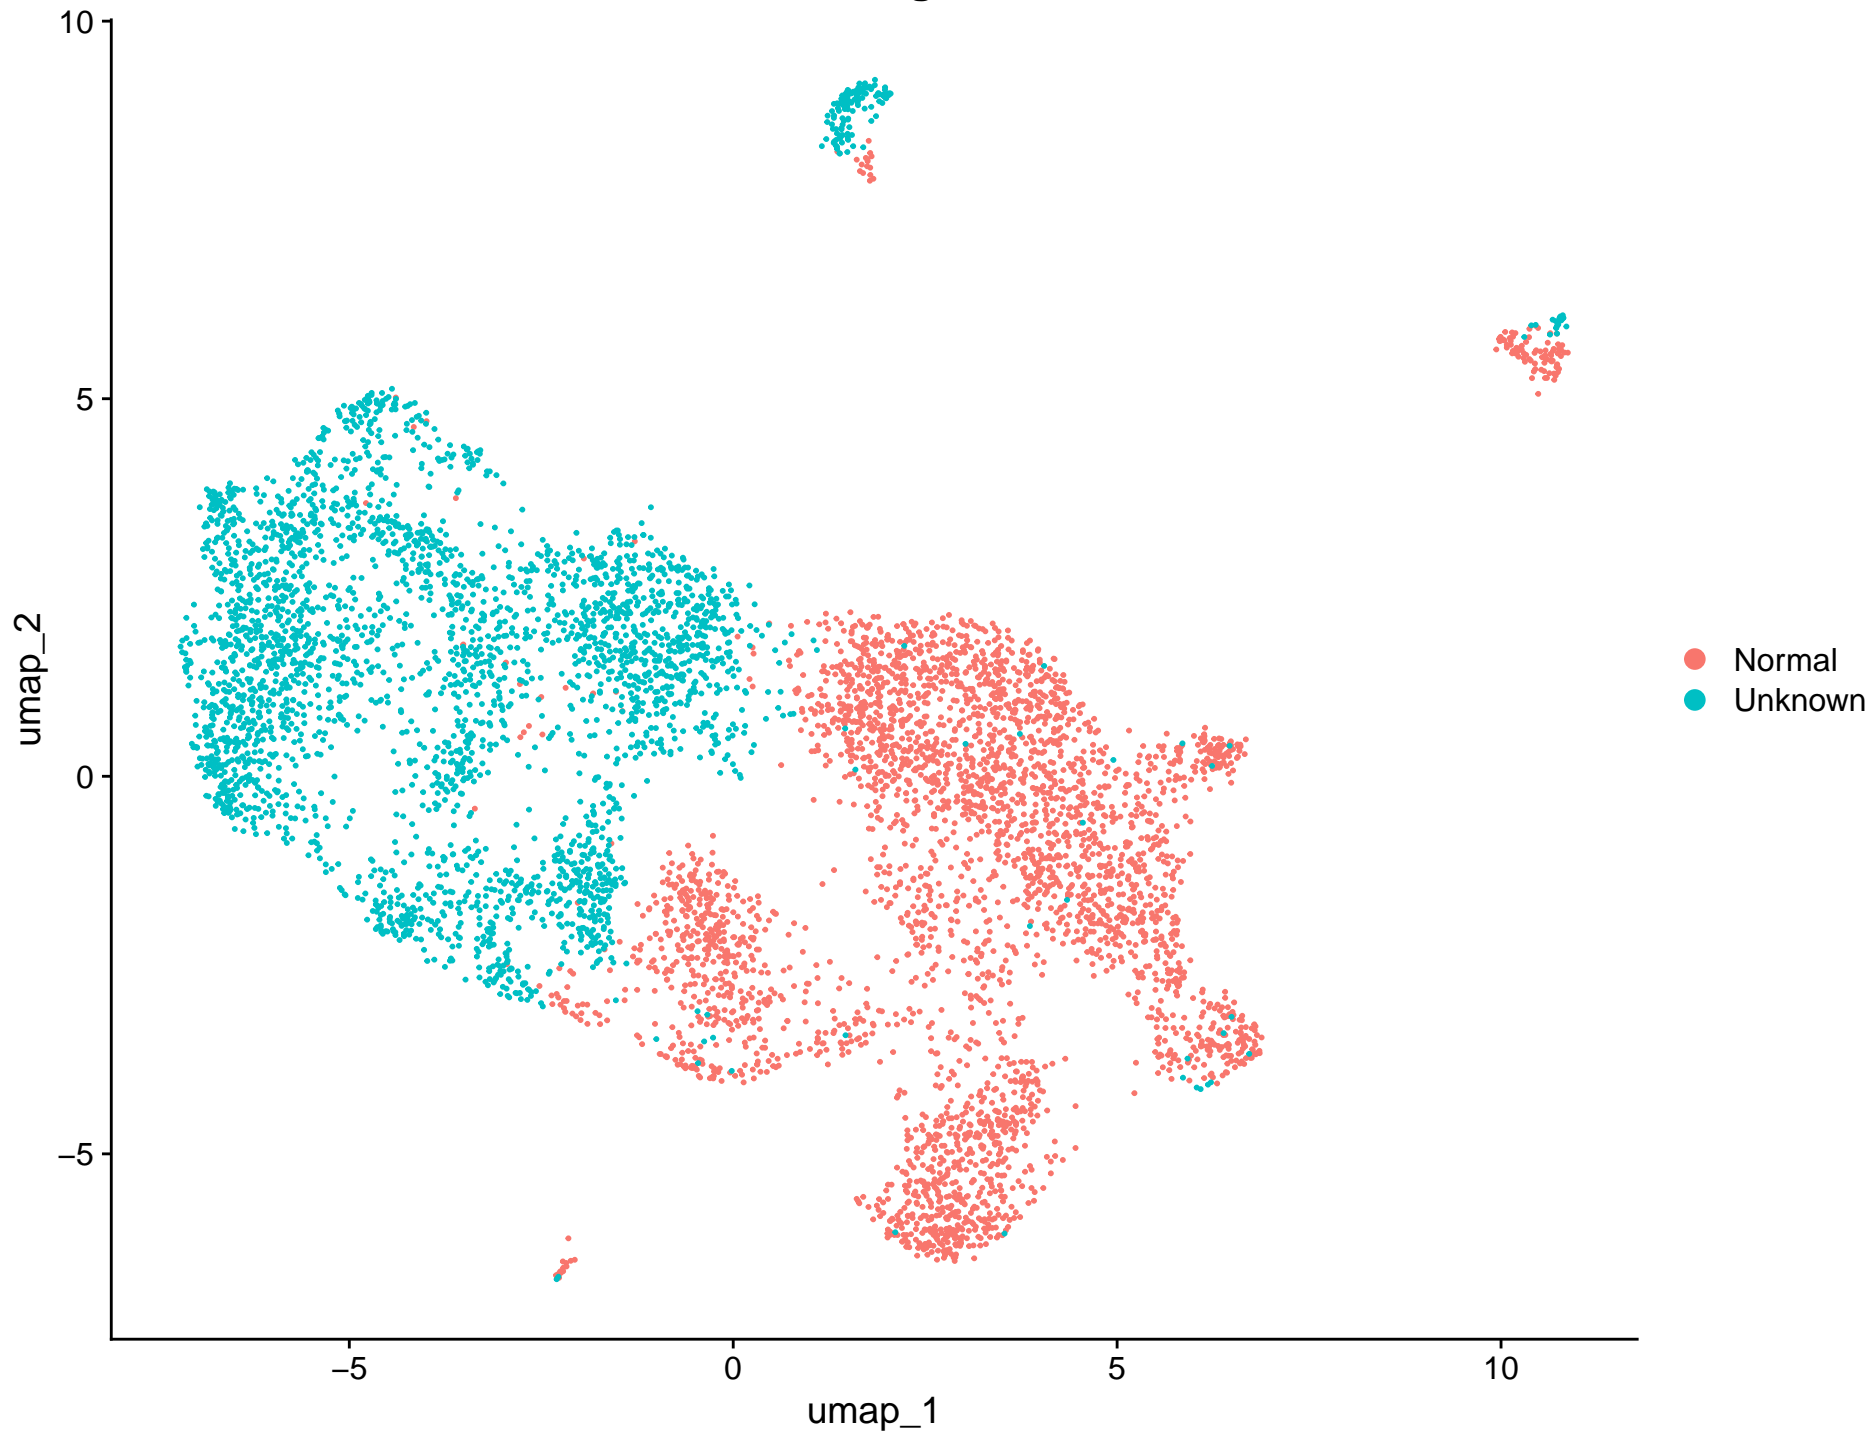

Supplement: Supplementary file 3 [file 0f72062ab195f827e6047e7b.pdf]

# Slingshot Trajectory: FC Subtypes

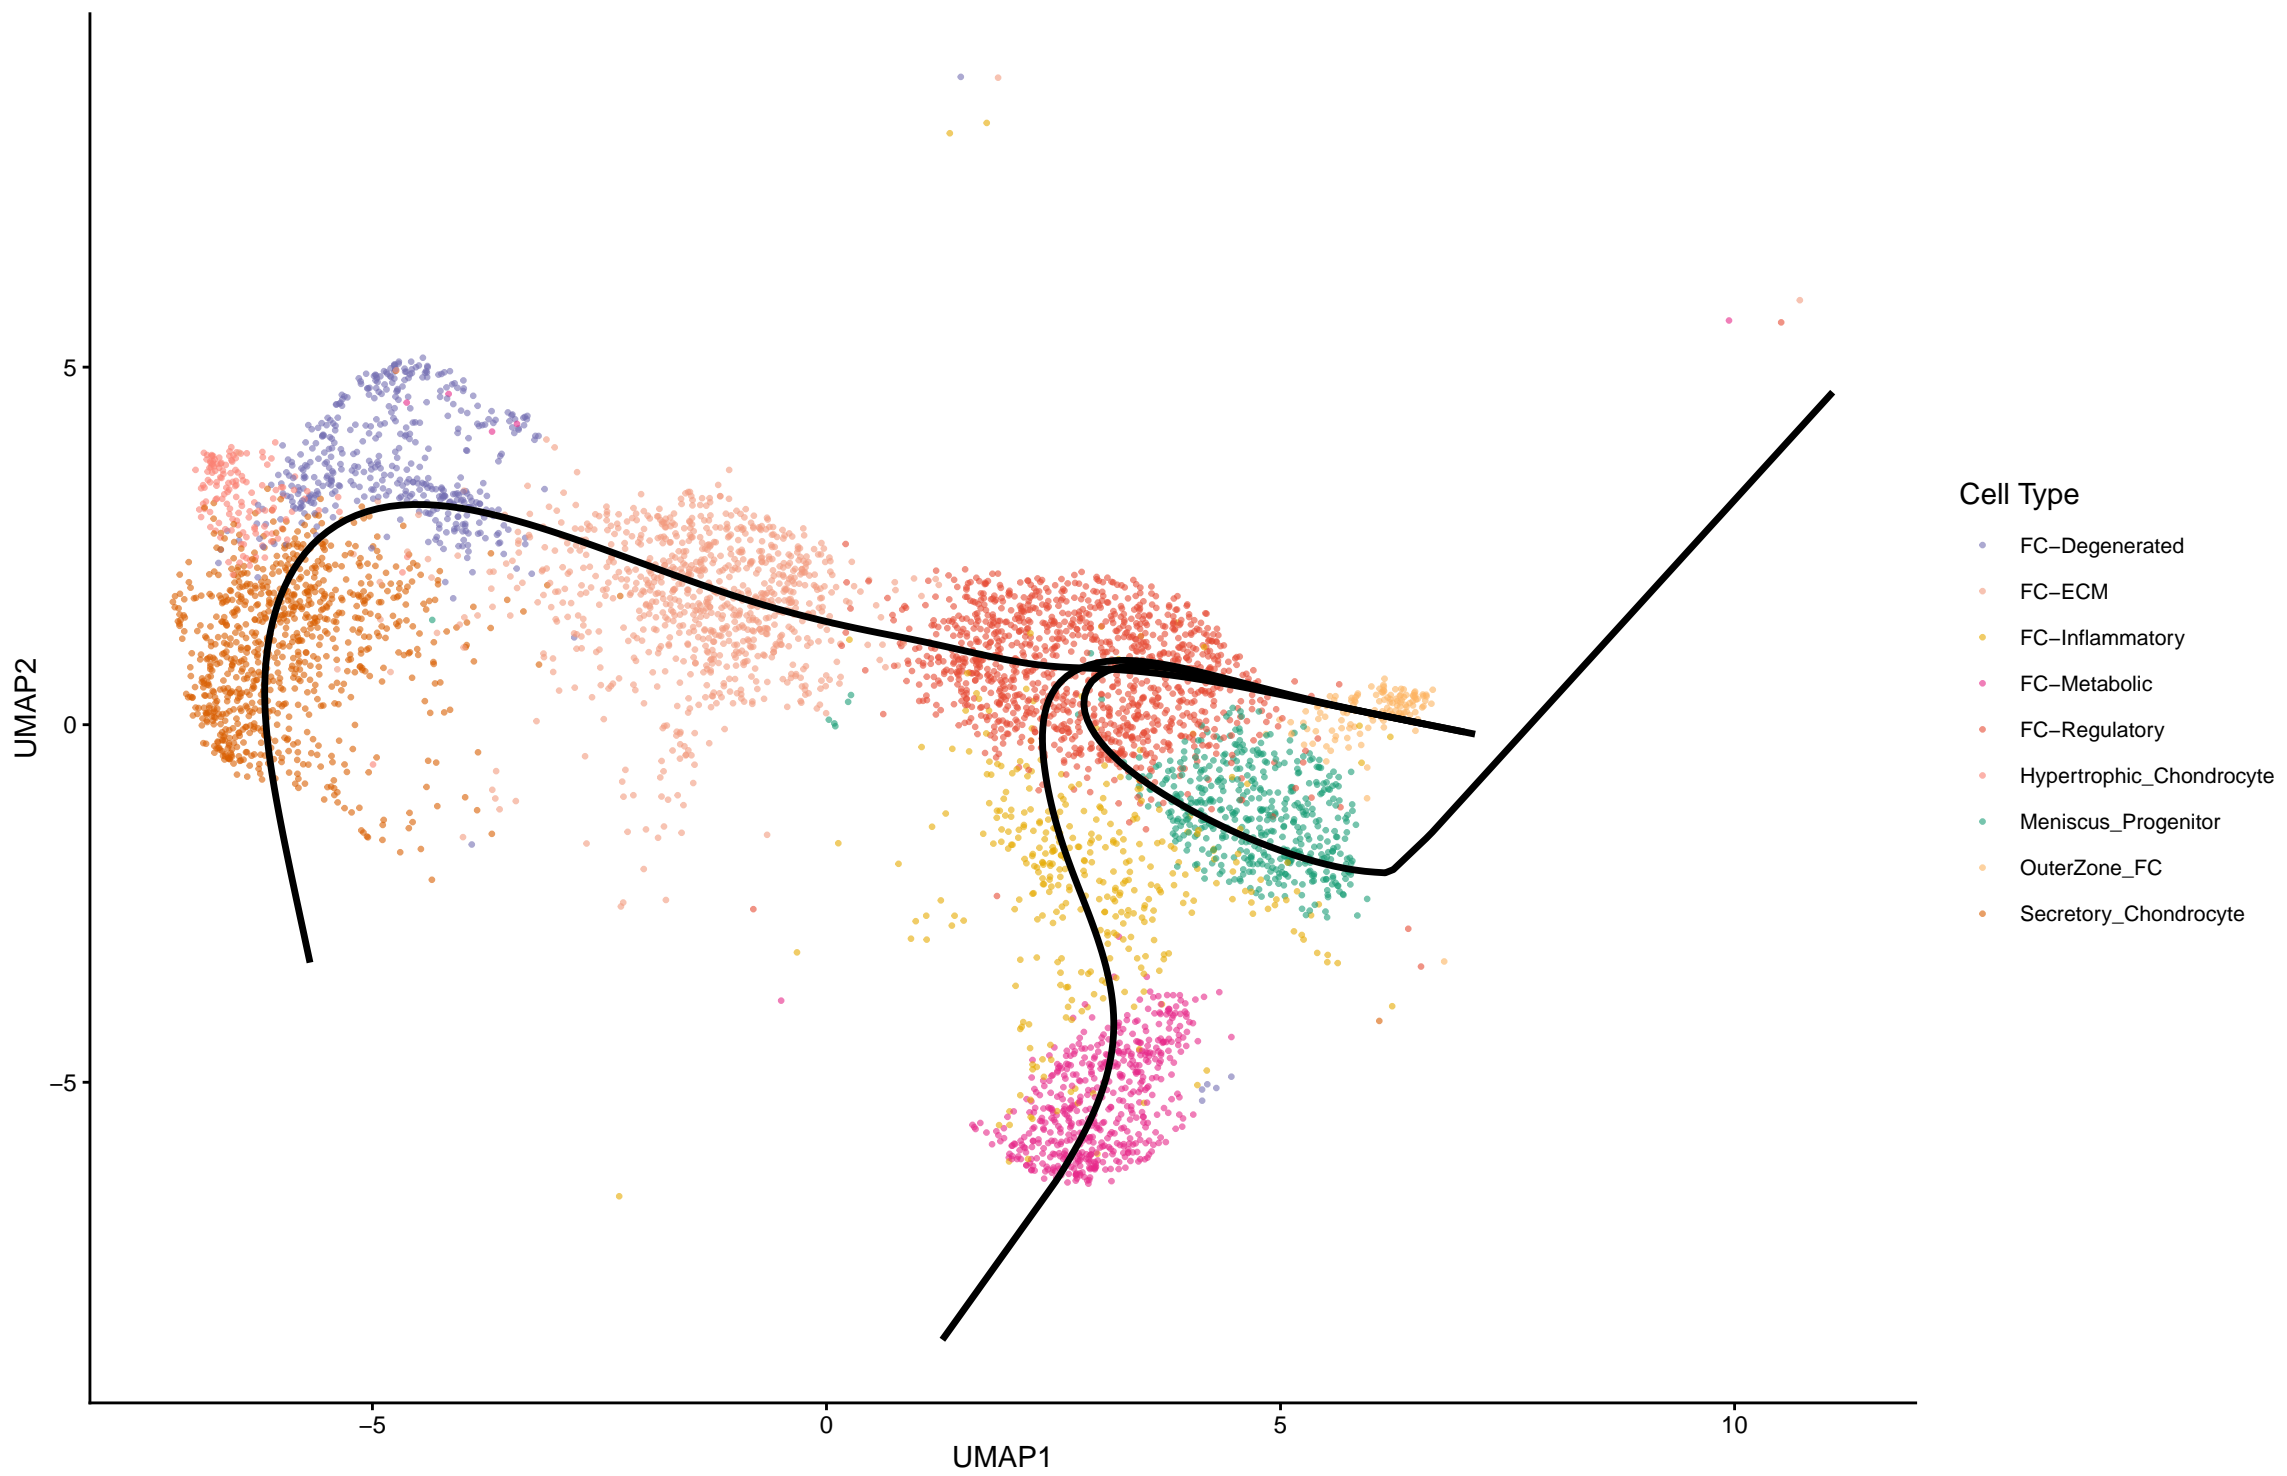

Supplement: Supplementary file 4 [file 15085ec1d33d0f3b2e11aa61.pdf]

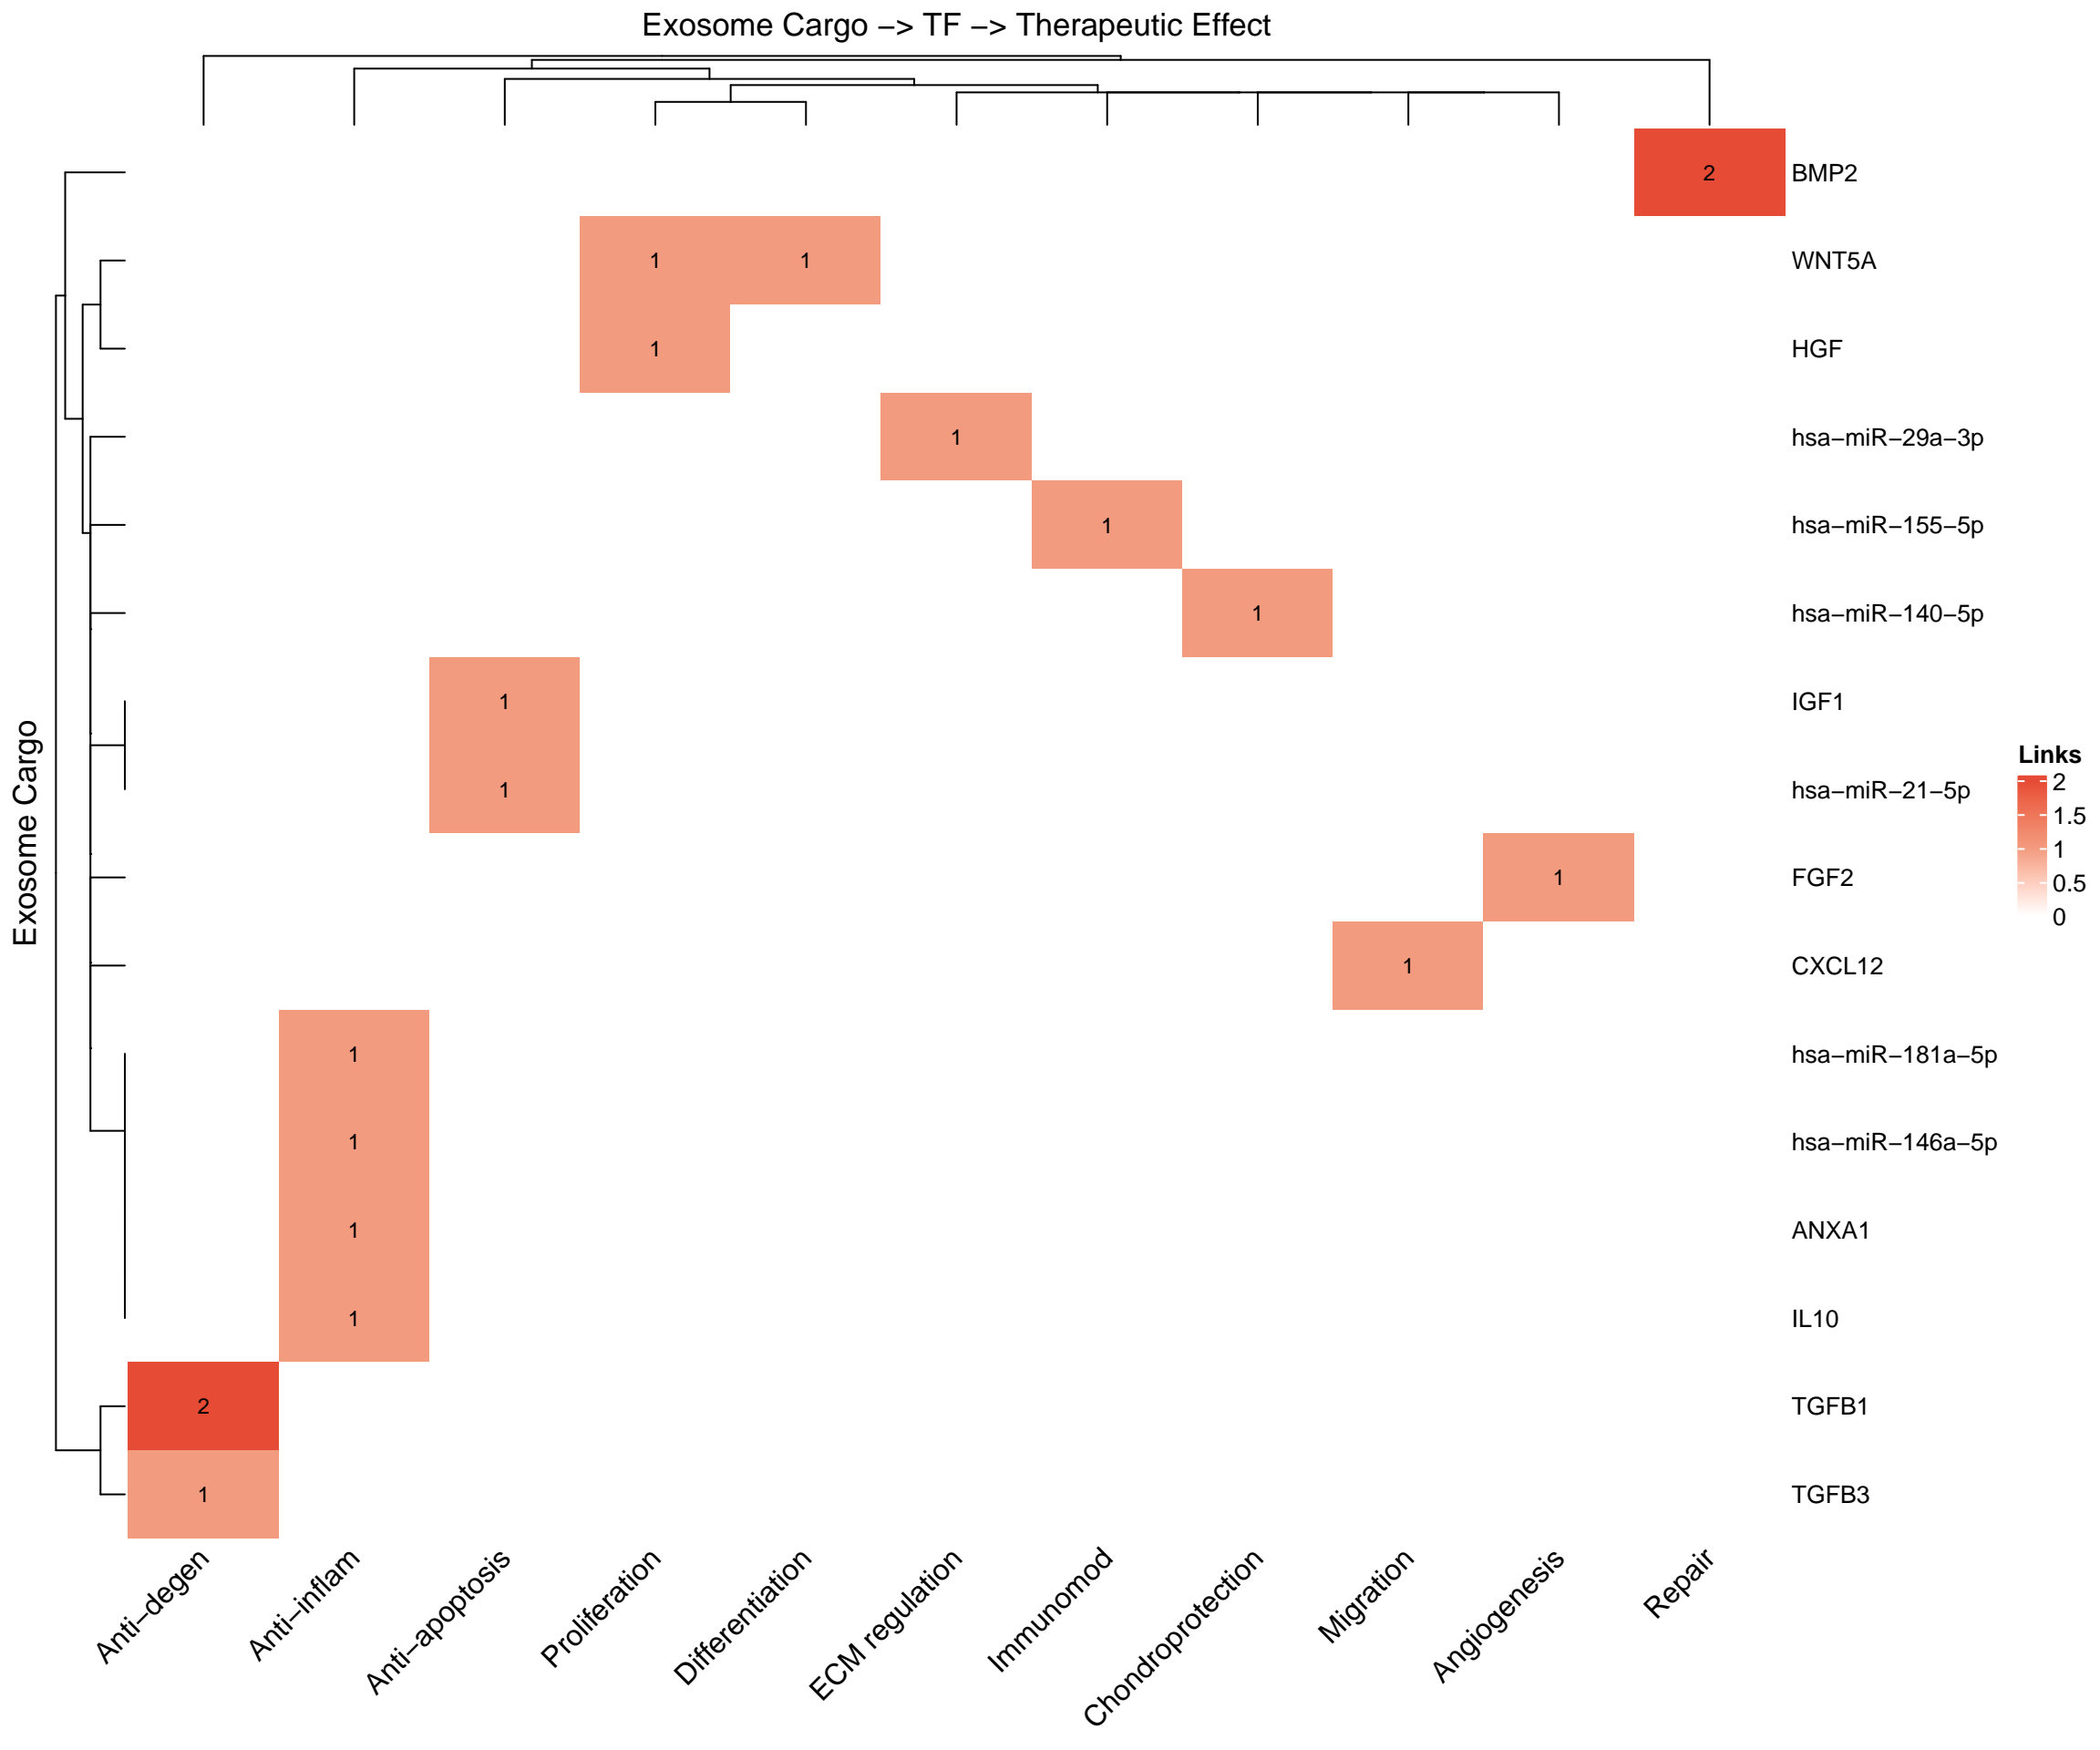

Supplement: Supplementary file 5 [file 232c82f6a1ddc093c9d82a40.pdf]

# Cell Type Treatability by MSC Exosomes

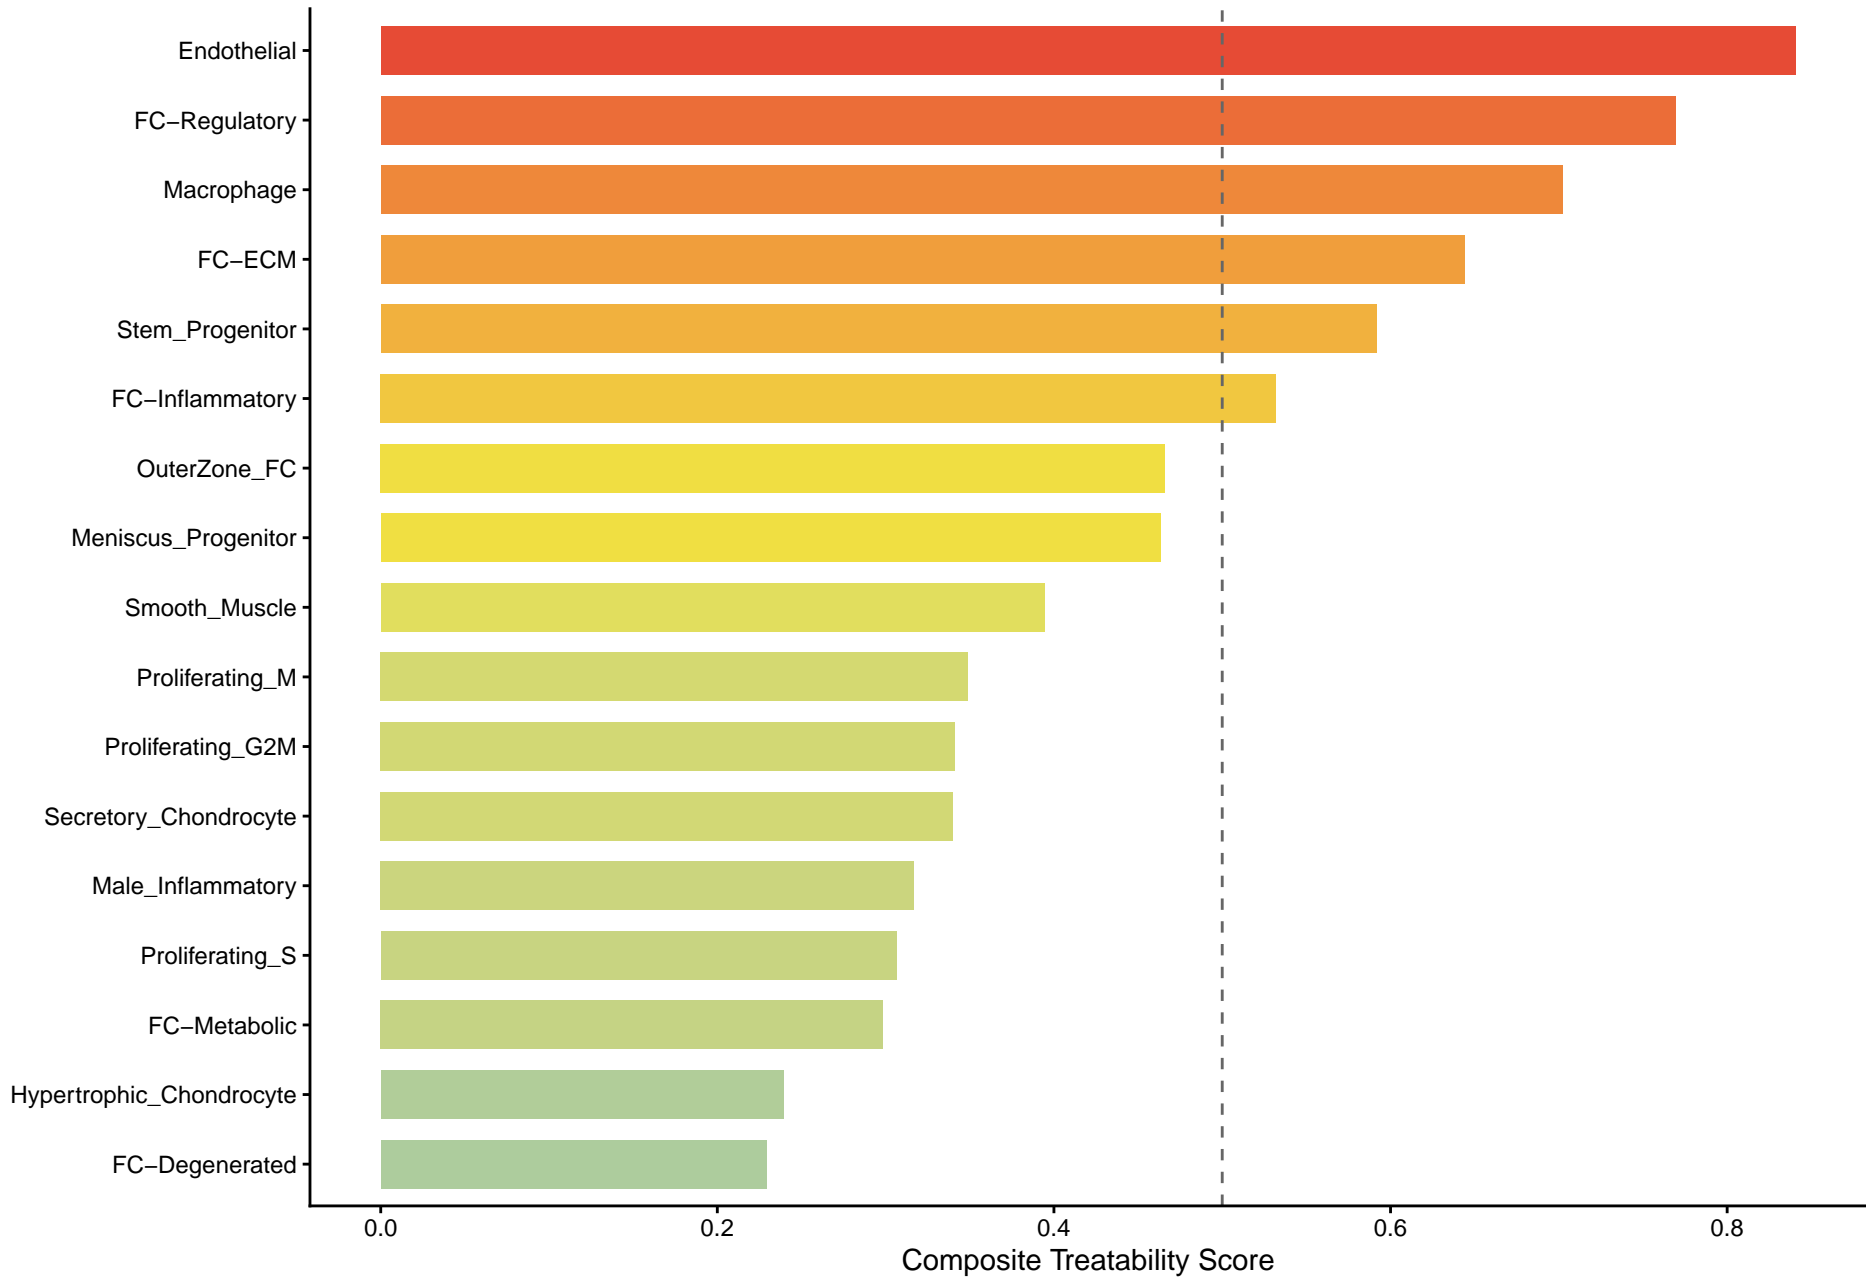

Supplement: Supplementary file 6 [file 331725bcdec992c277642f9e.pdf]

Pseudotime (FC-Regulatory → Degeneration)

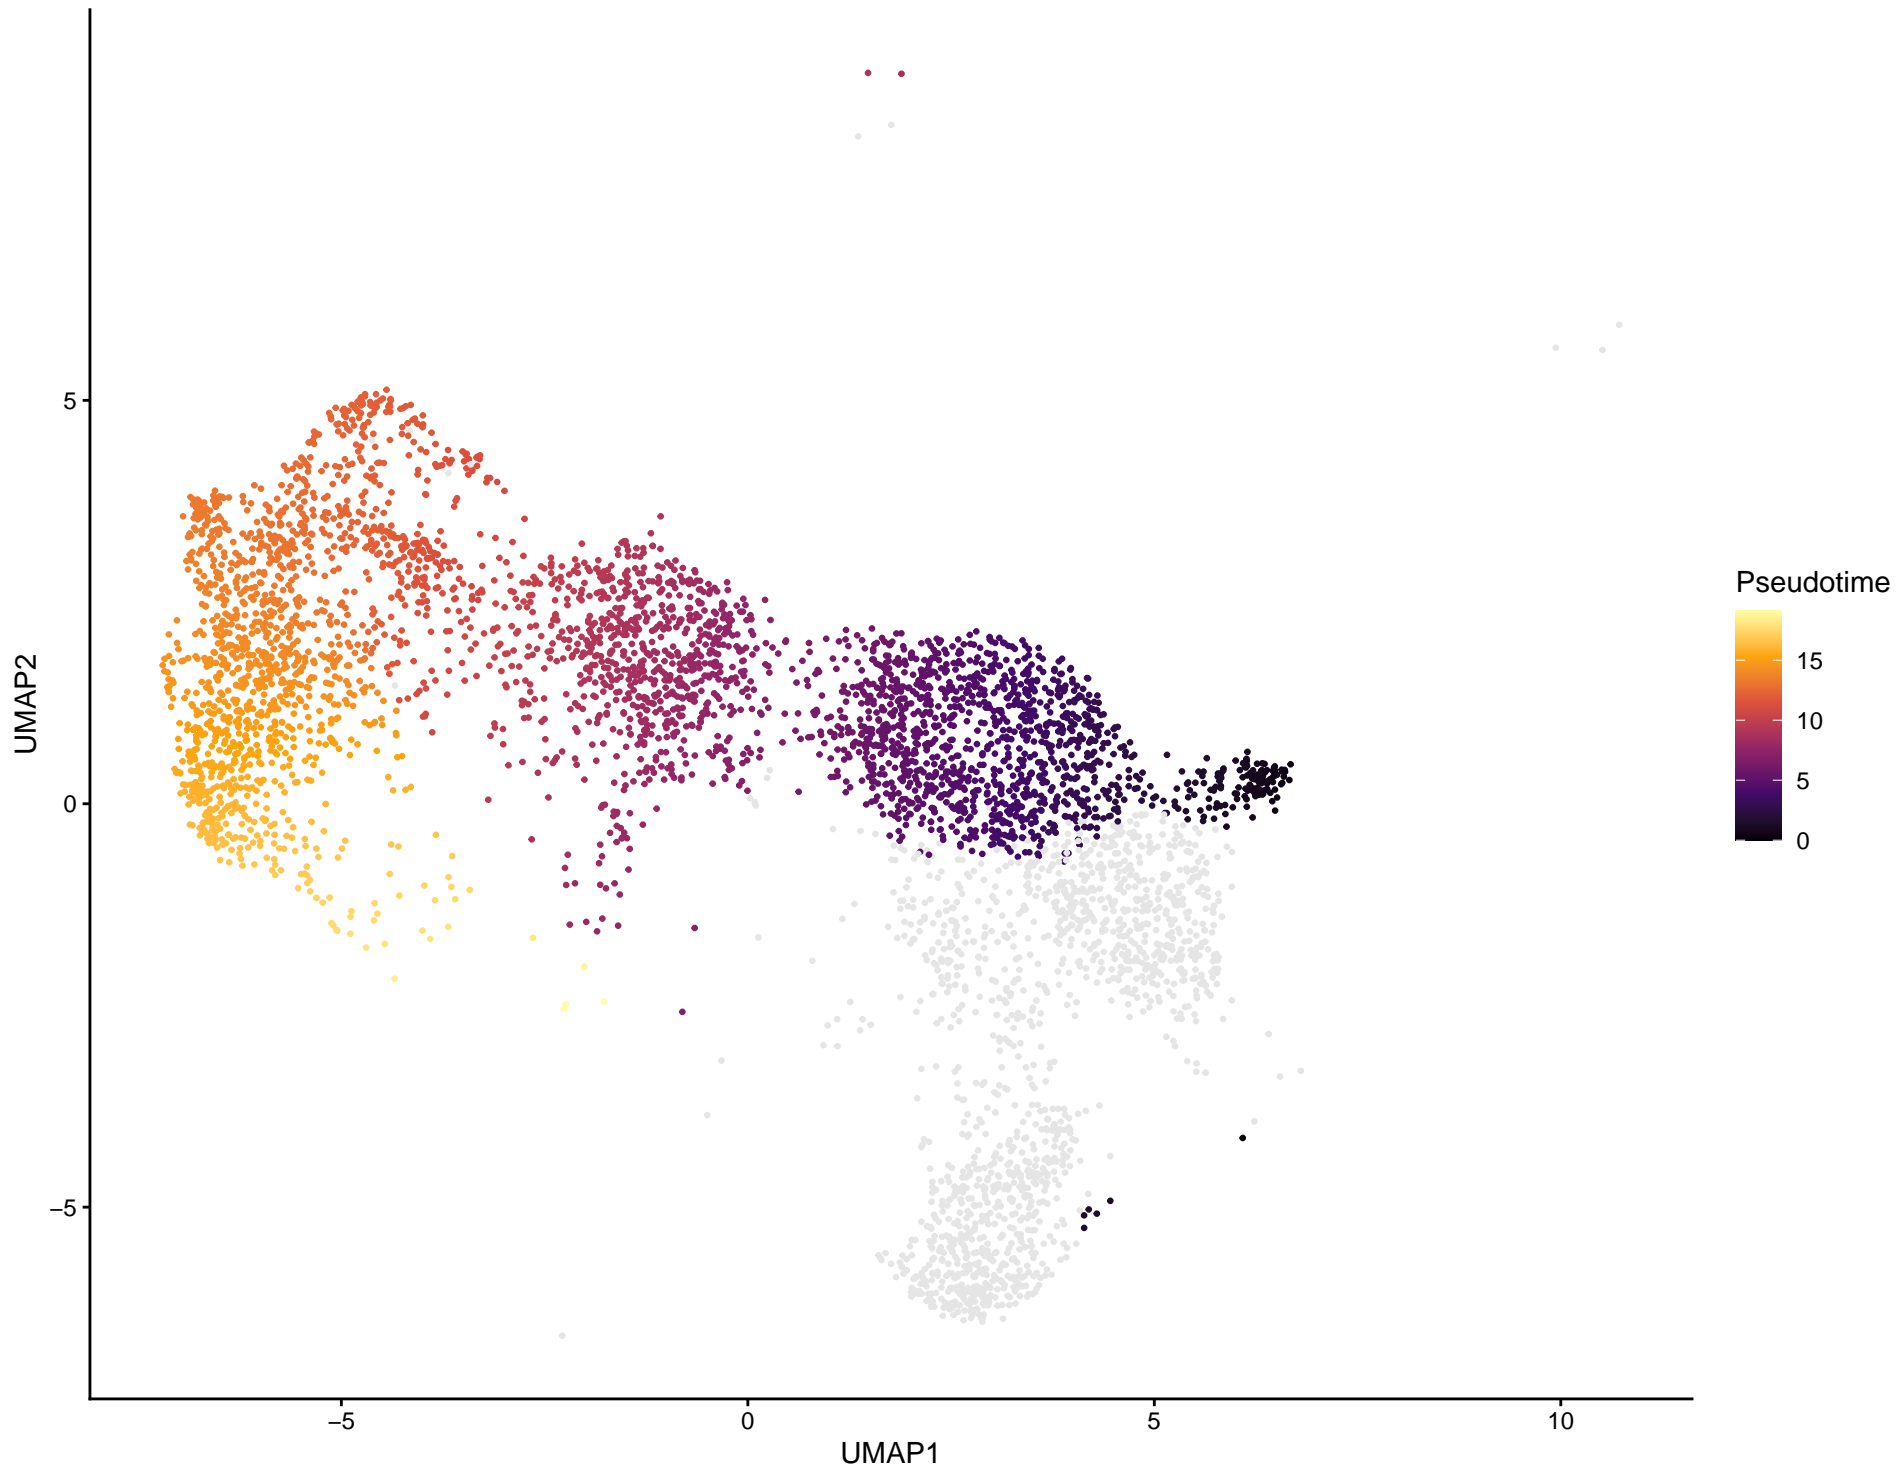

Supplement: Supplementary file 8 [file 62fda64a9d054c664f219b6a.pdf]

Pseudotime (Early → Late Degeneration)

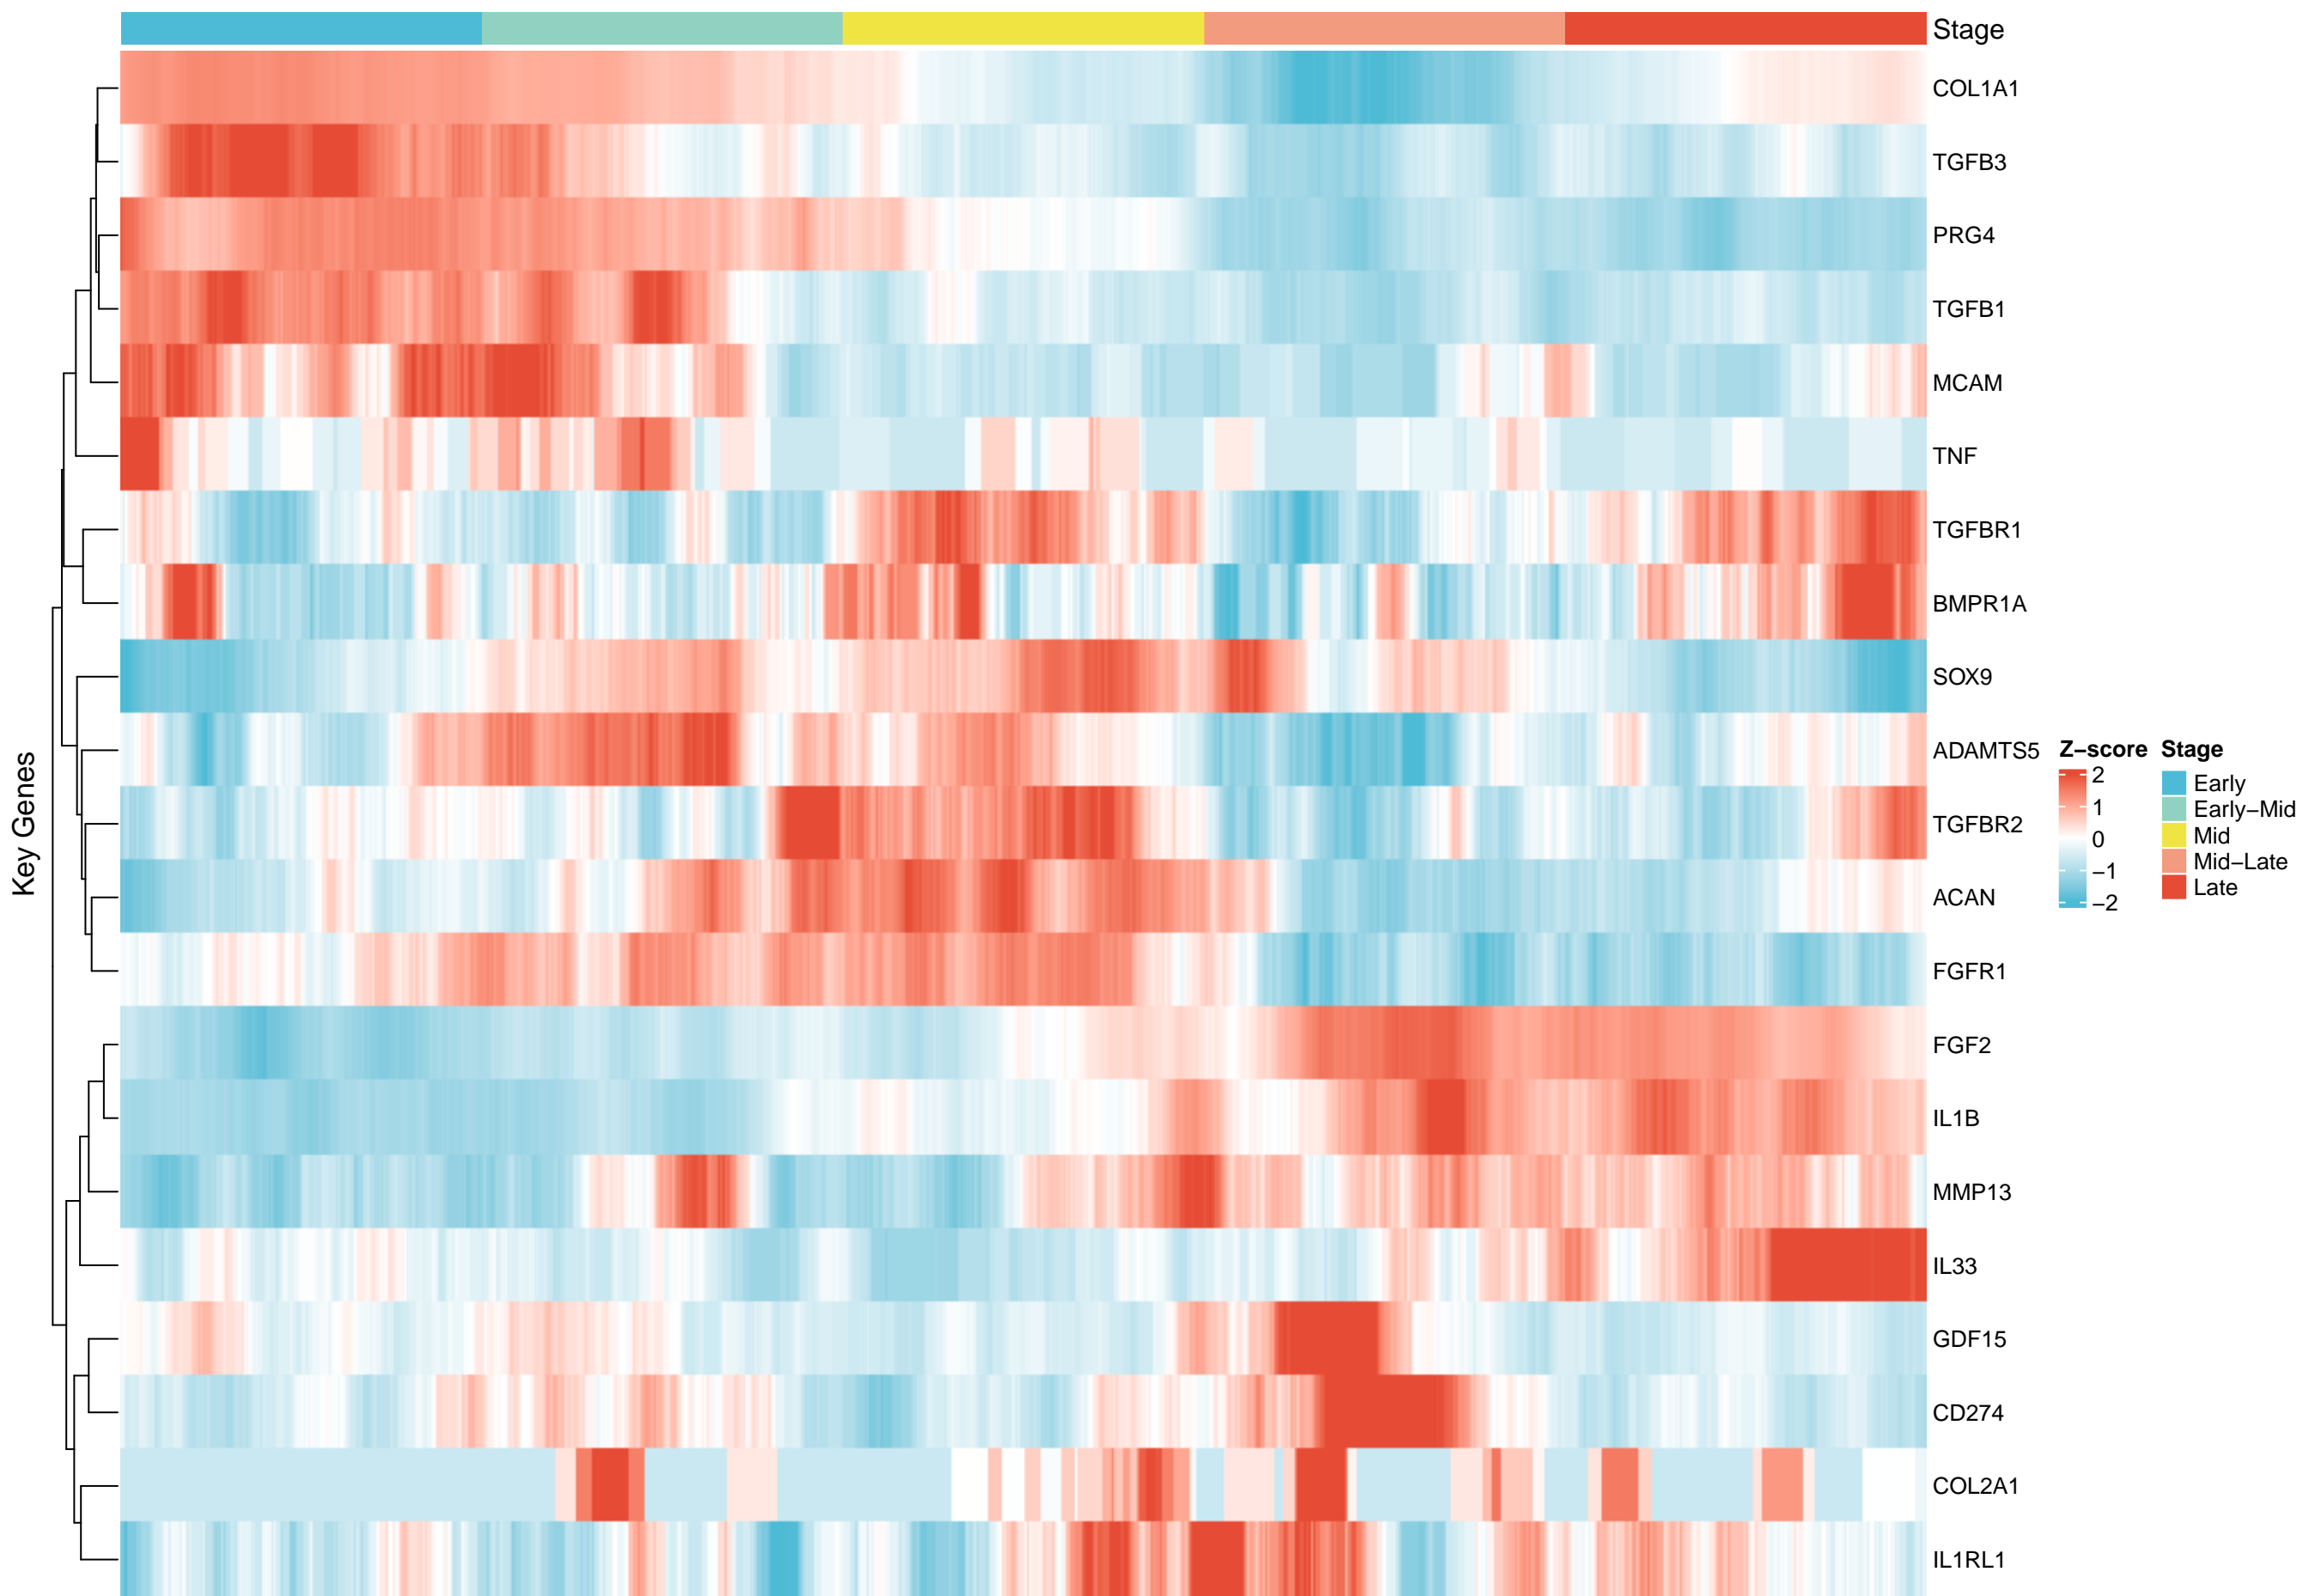

Supplement: Supplementary file 9 [file 83a54a754debecb6ca4ed138.pdf]

Differentiation Potential by Cell Type

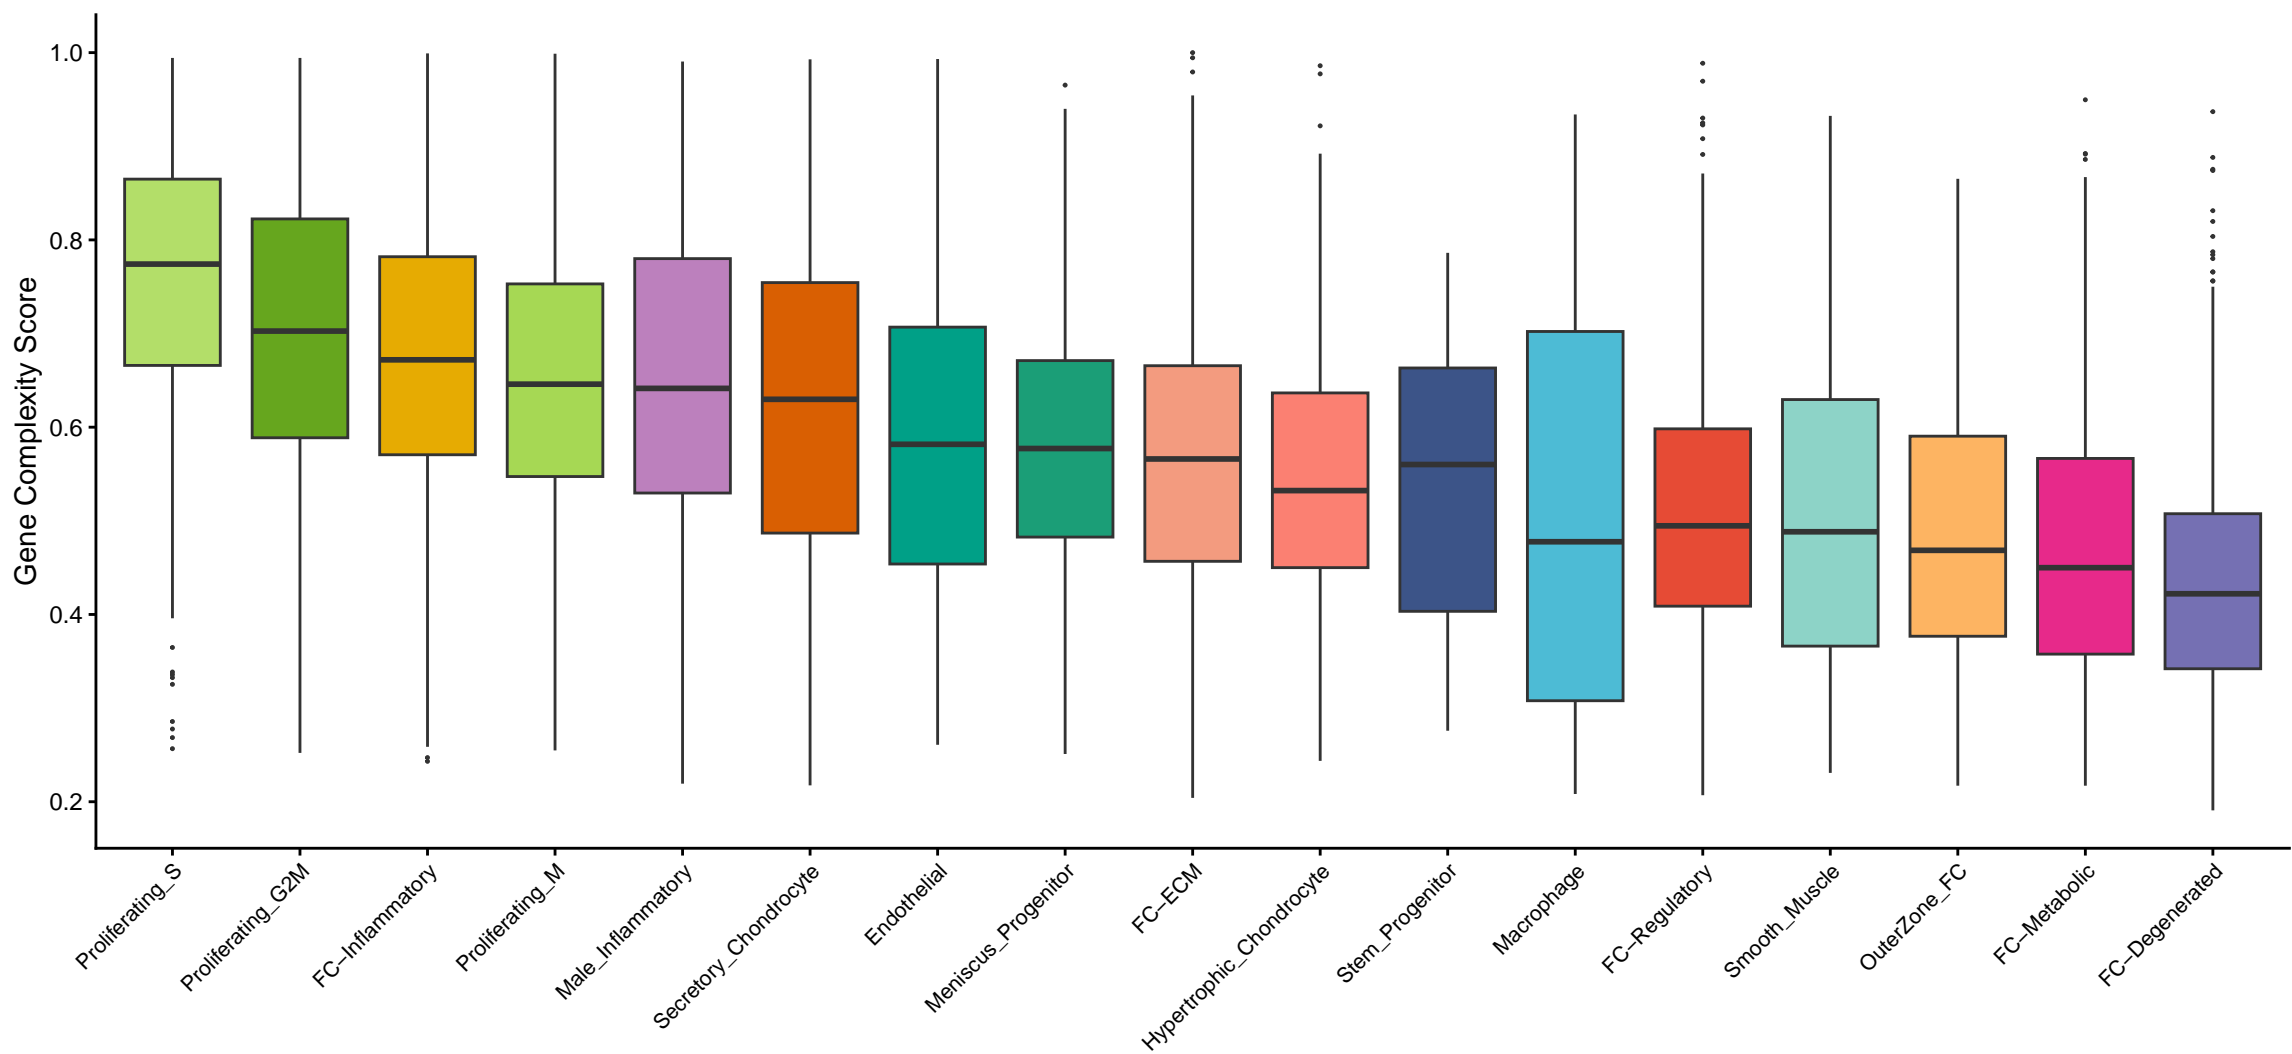

Supplement: Supplementary file 10 [file 8a35ee0608549c90956776ce.pdf]

Clusters

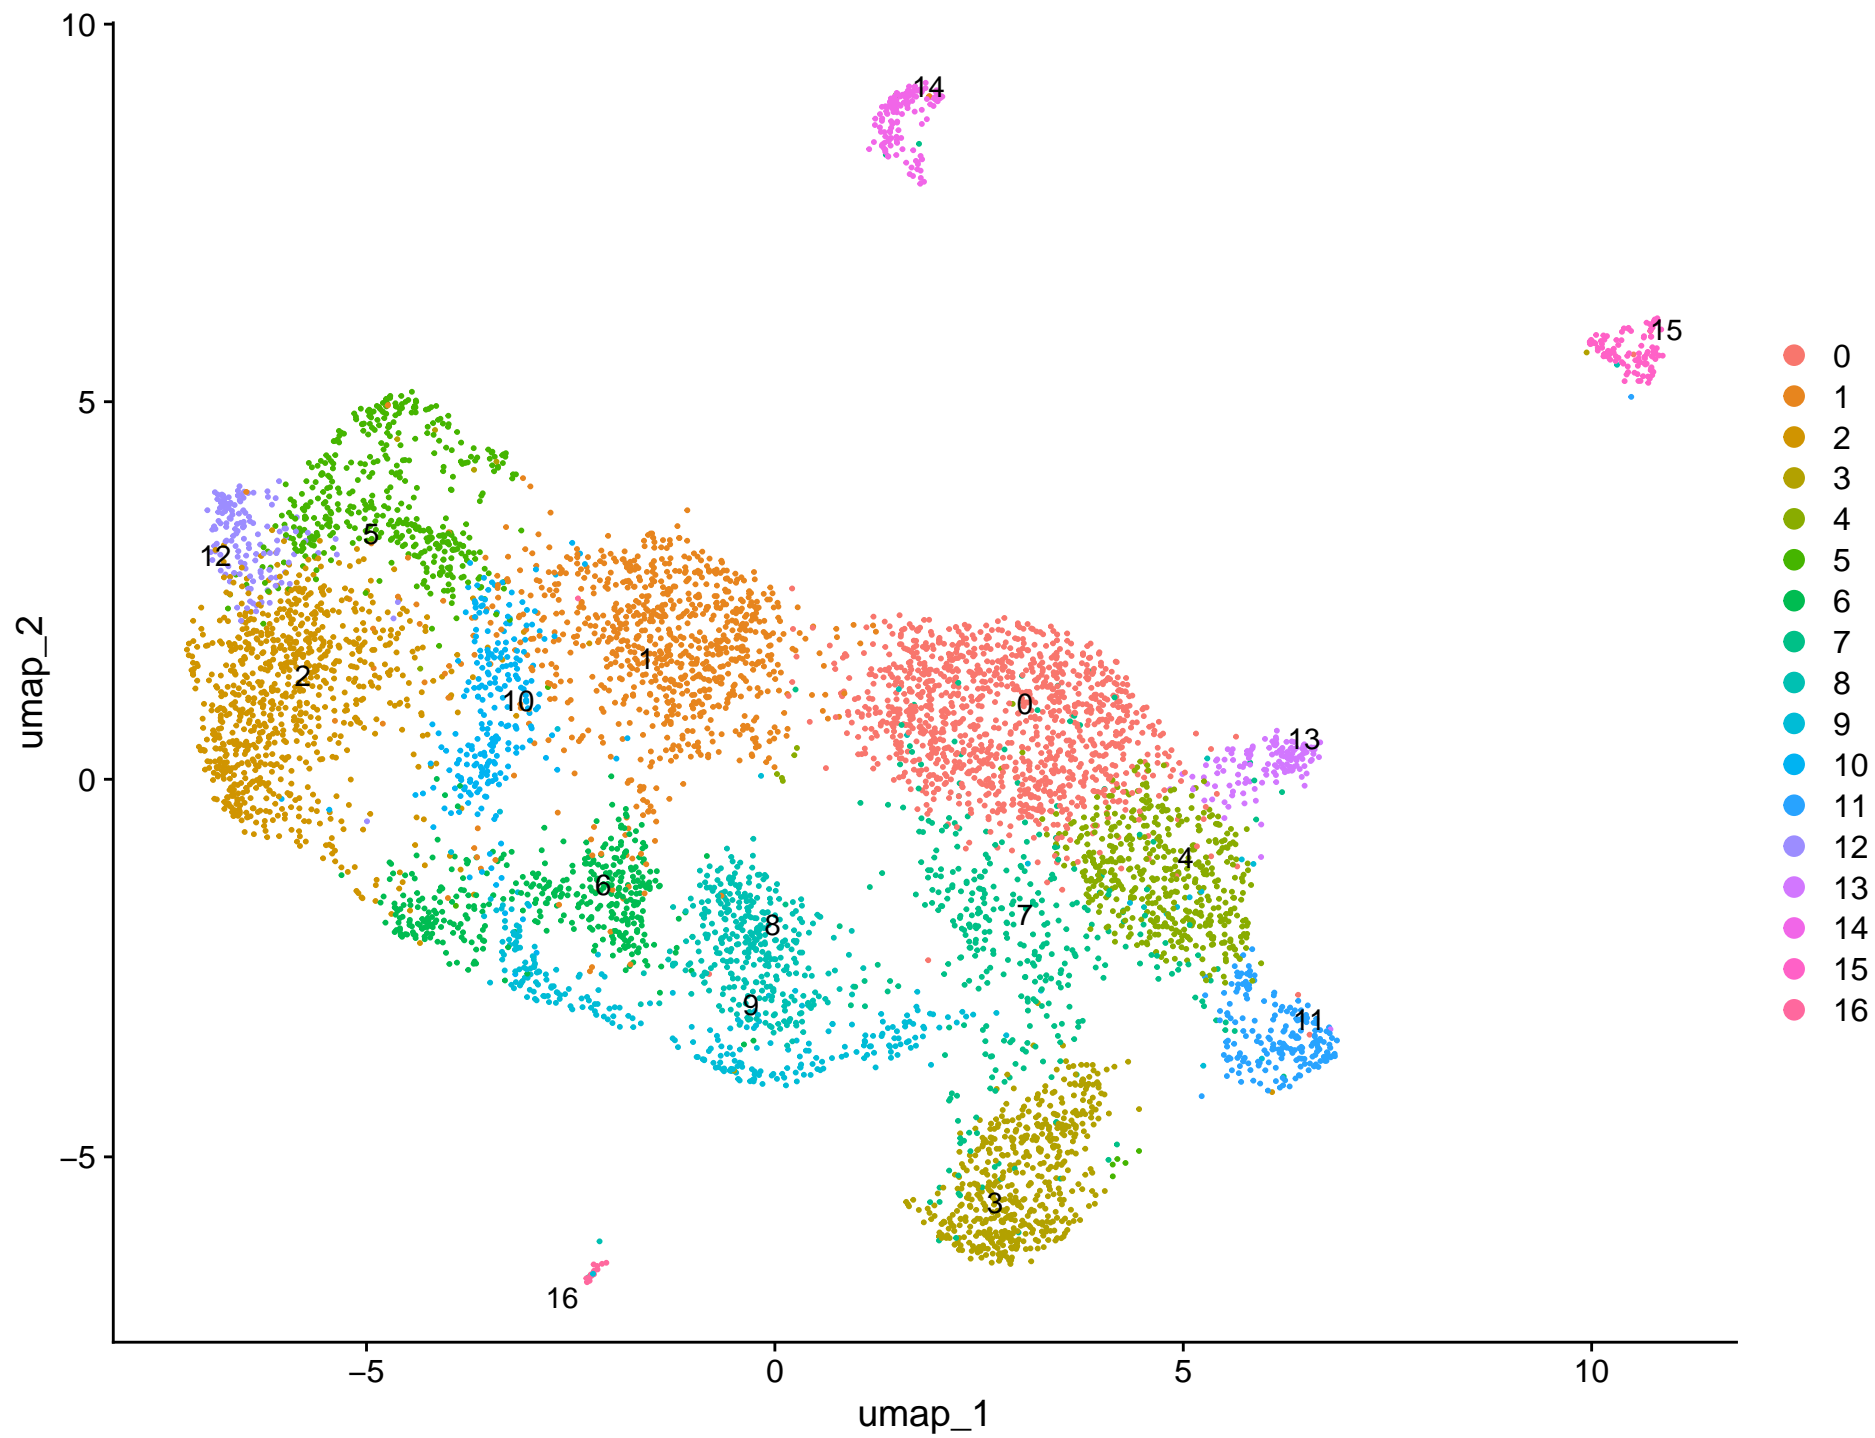

Supplement: Supplementary file 11 [file 9ed48acef60b41f049c759fe.pdf]

Pseudotime Distribution: Normal vs Degenerated

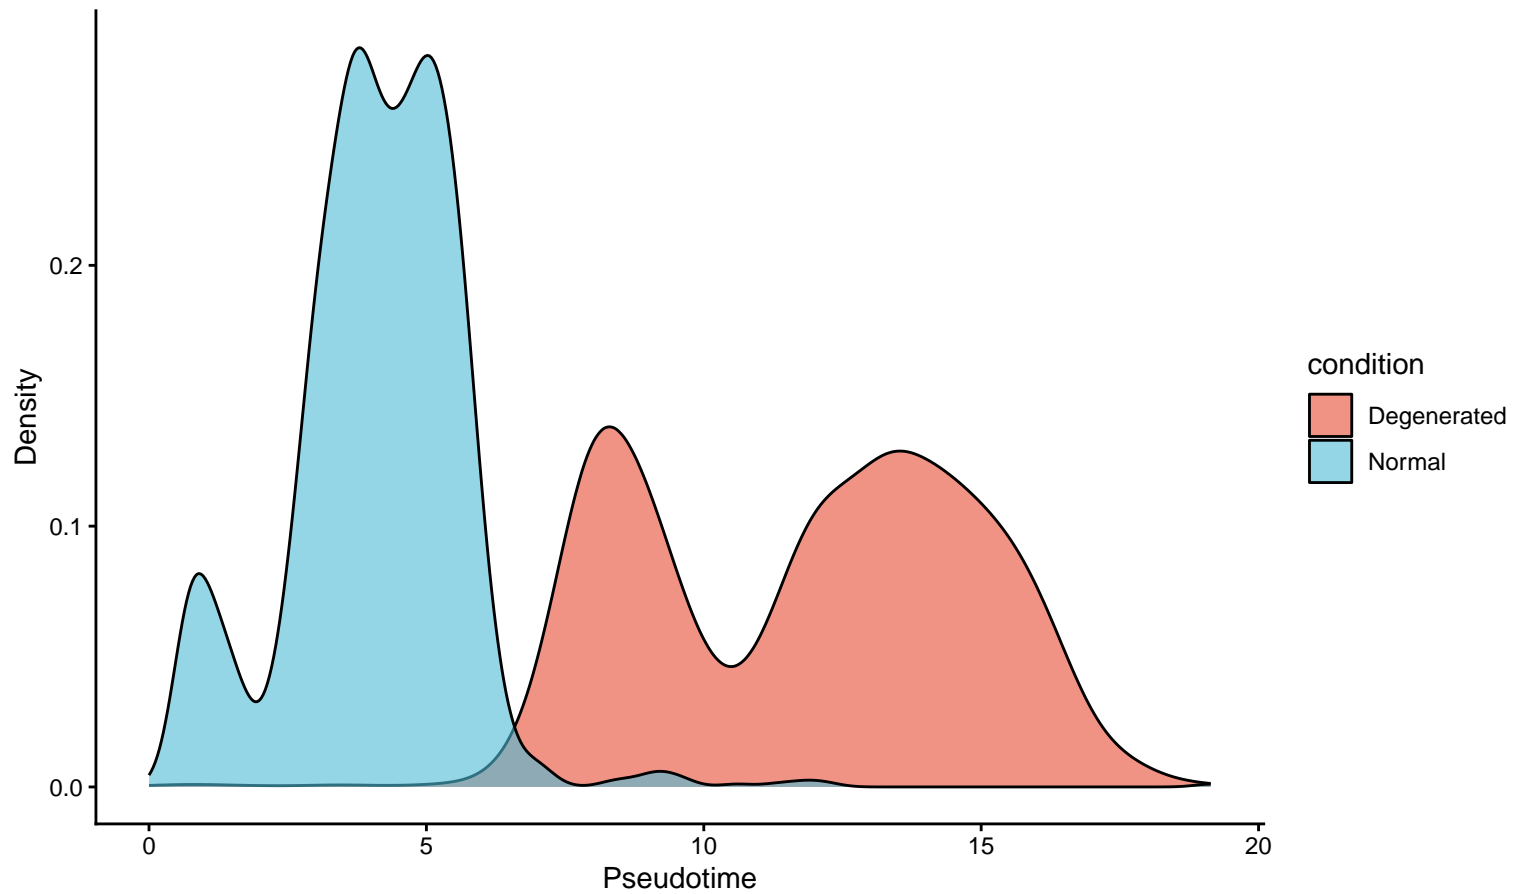

Supplement: Supplementary file 12 [file a3a3c4f632511cfbc6c58dbf.pdf]

GO – Exosomal miRNA Targets

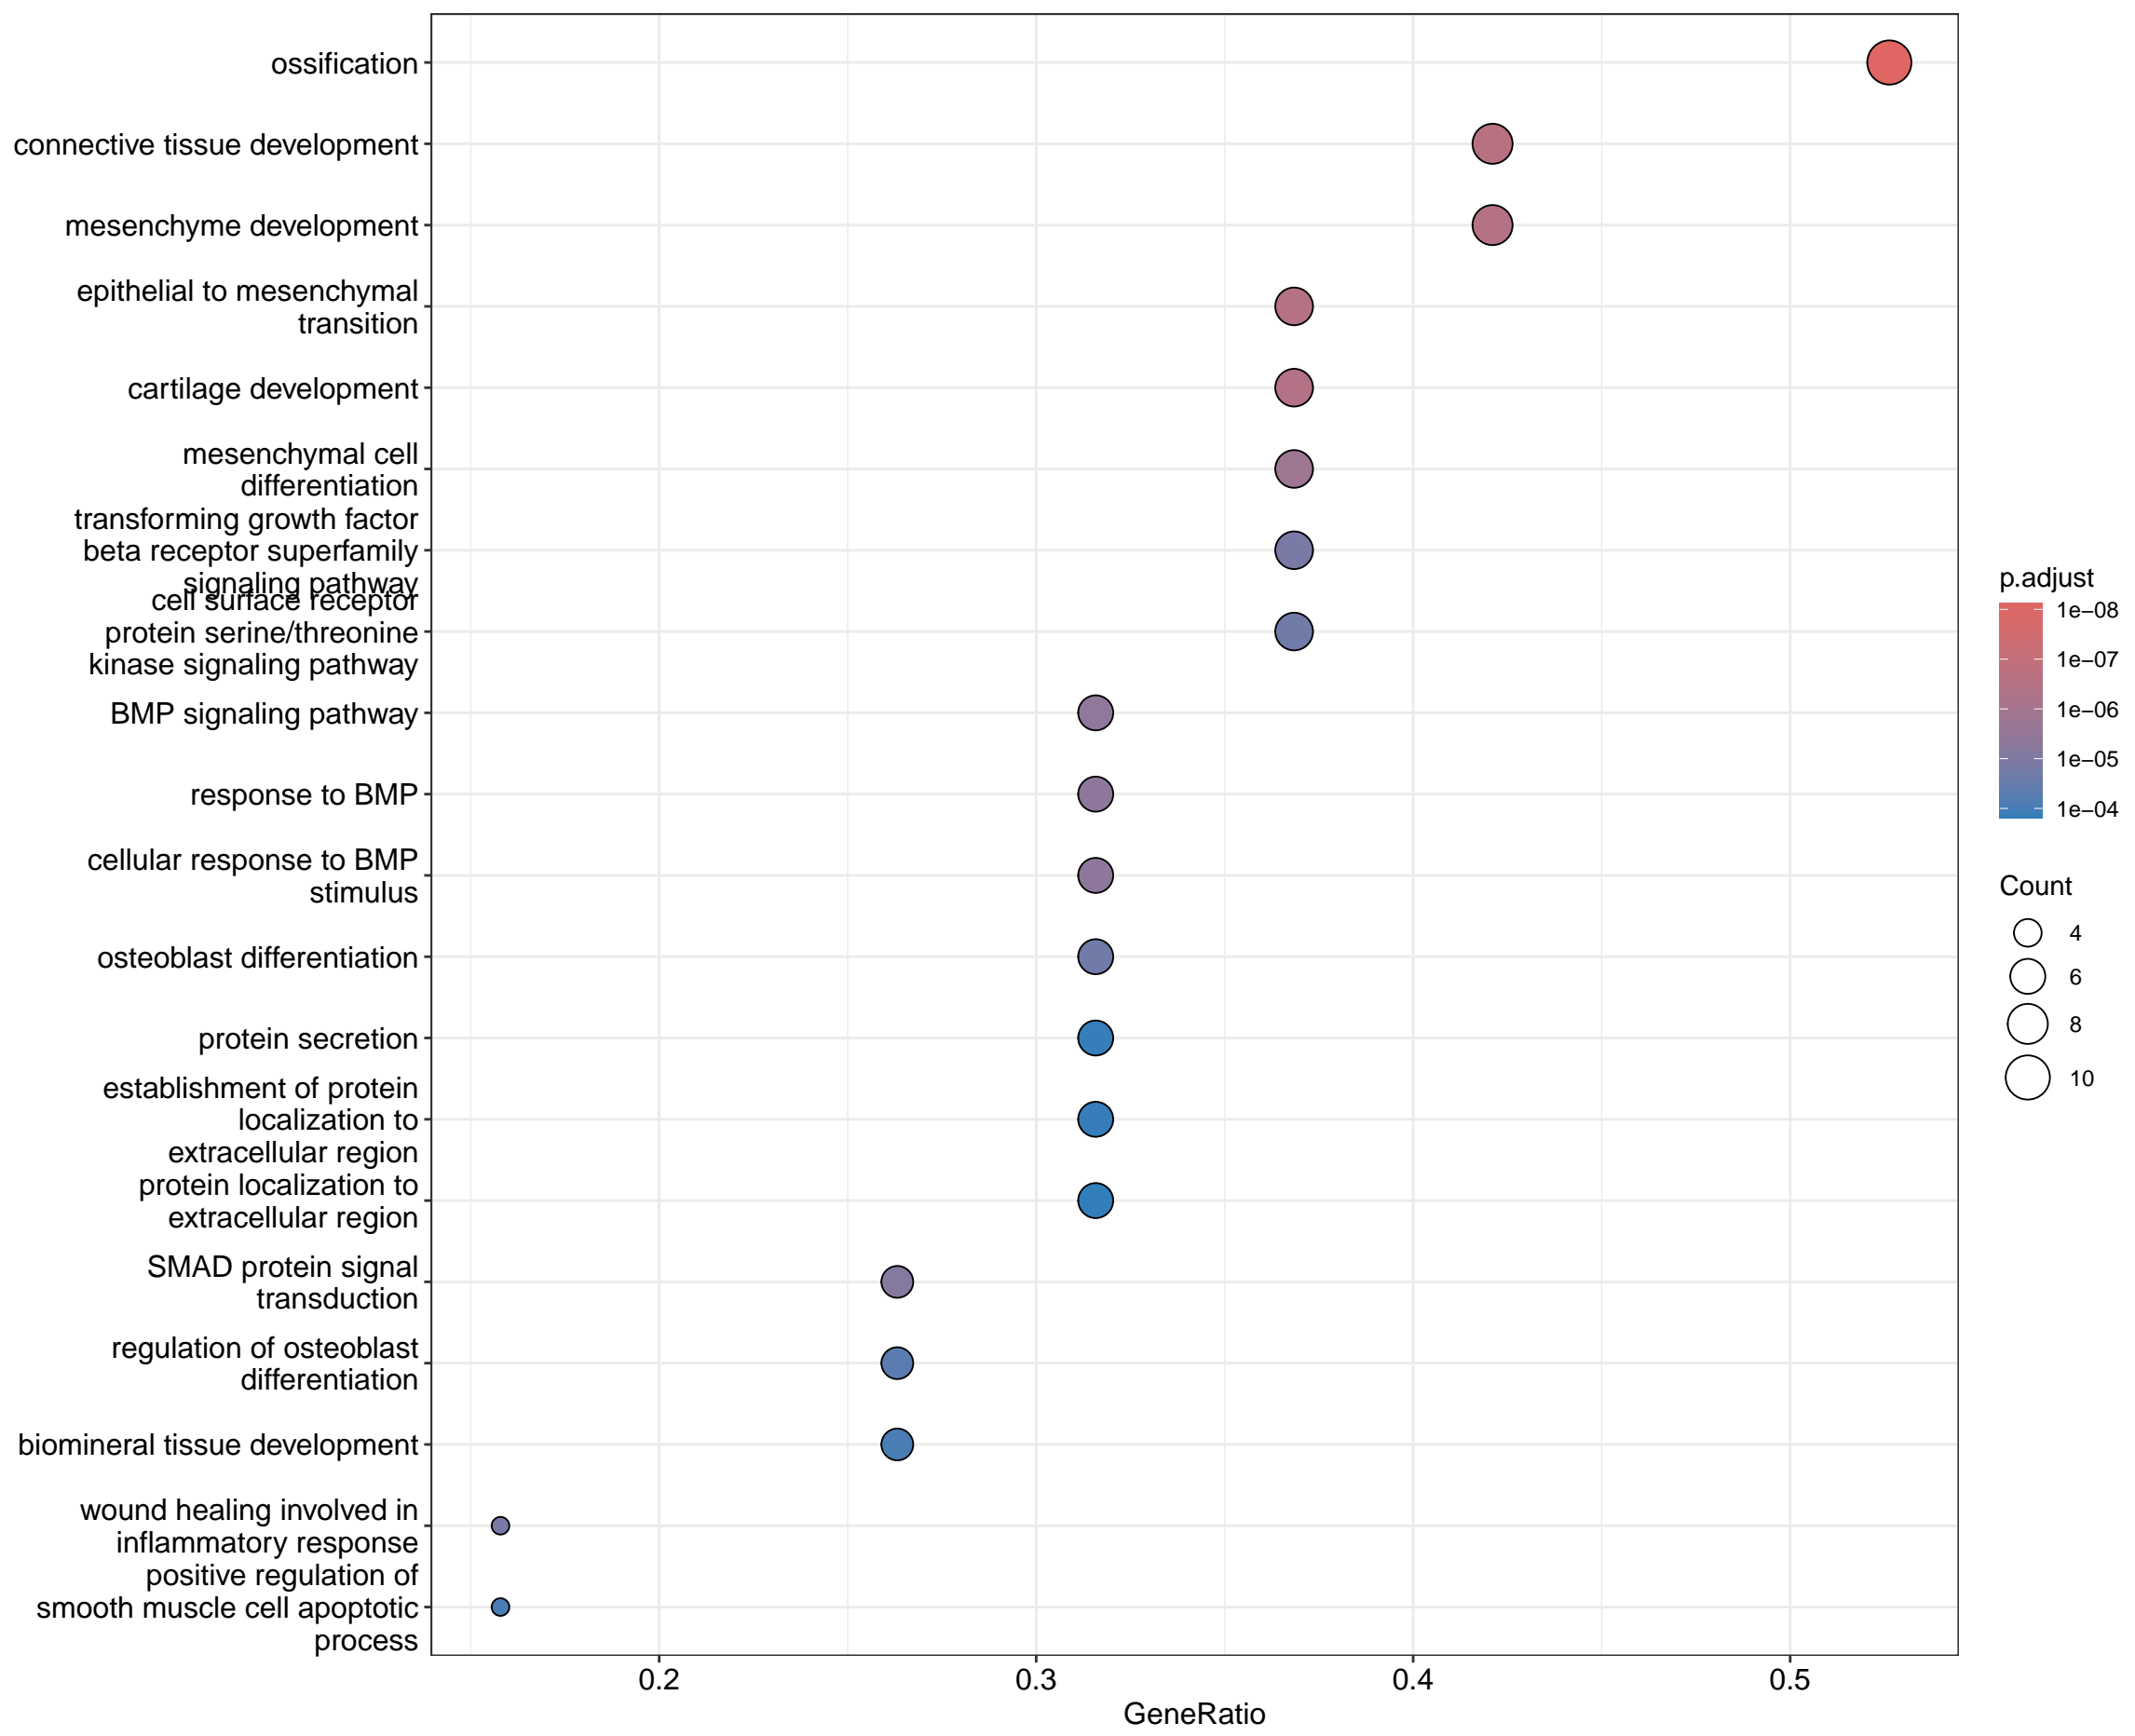

Supplement: Supplementary file 13 [file b22a4cb46ccd68584d3c07c6.pdf]

Differential Receptors: Degenerated vs Normal

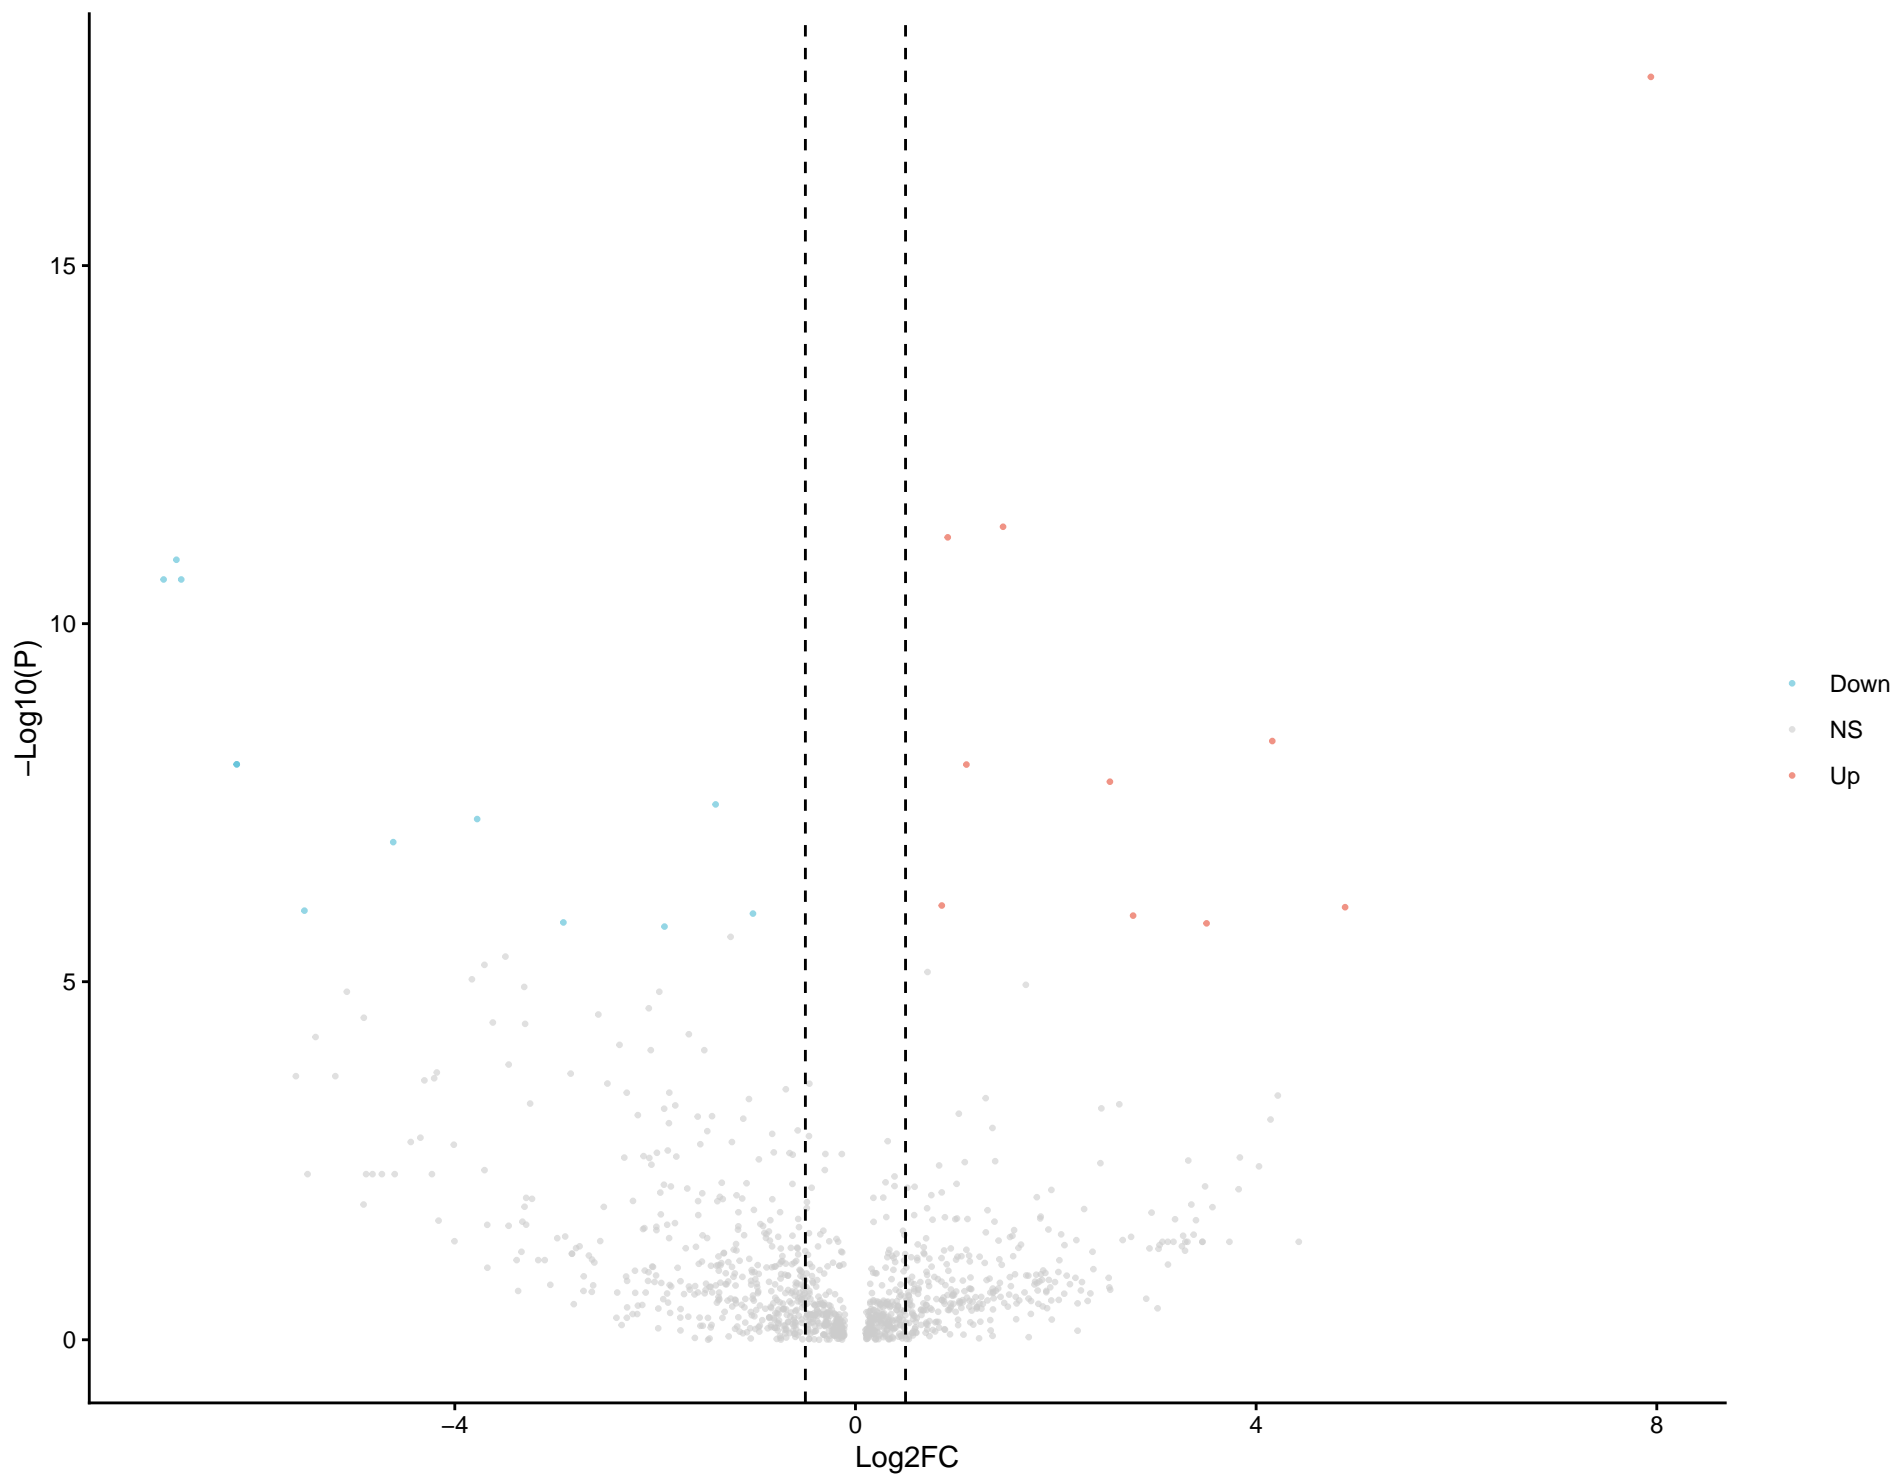

Supplement: Supplementary file 14 [file b4c4299b5061797dd3925eb4.pdf]

Treatability Score Decomposition

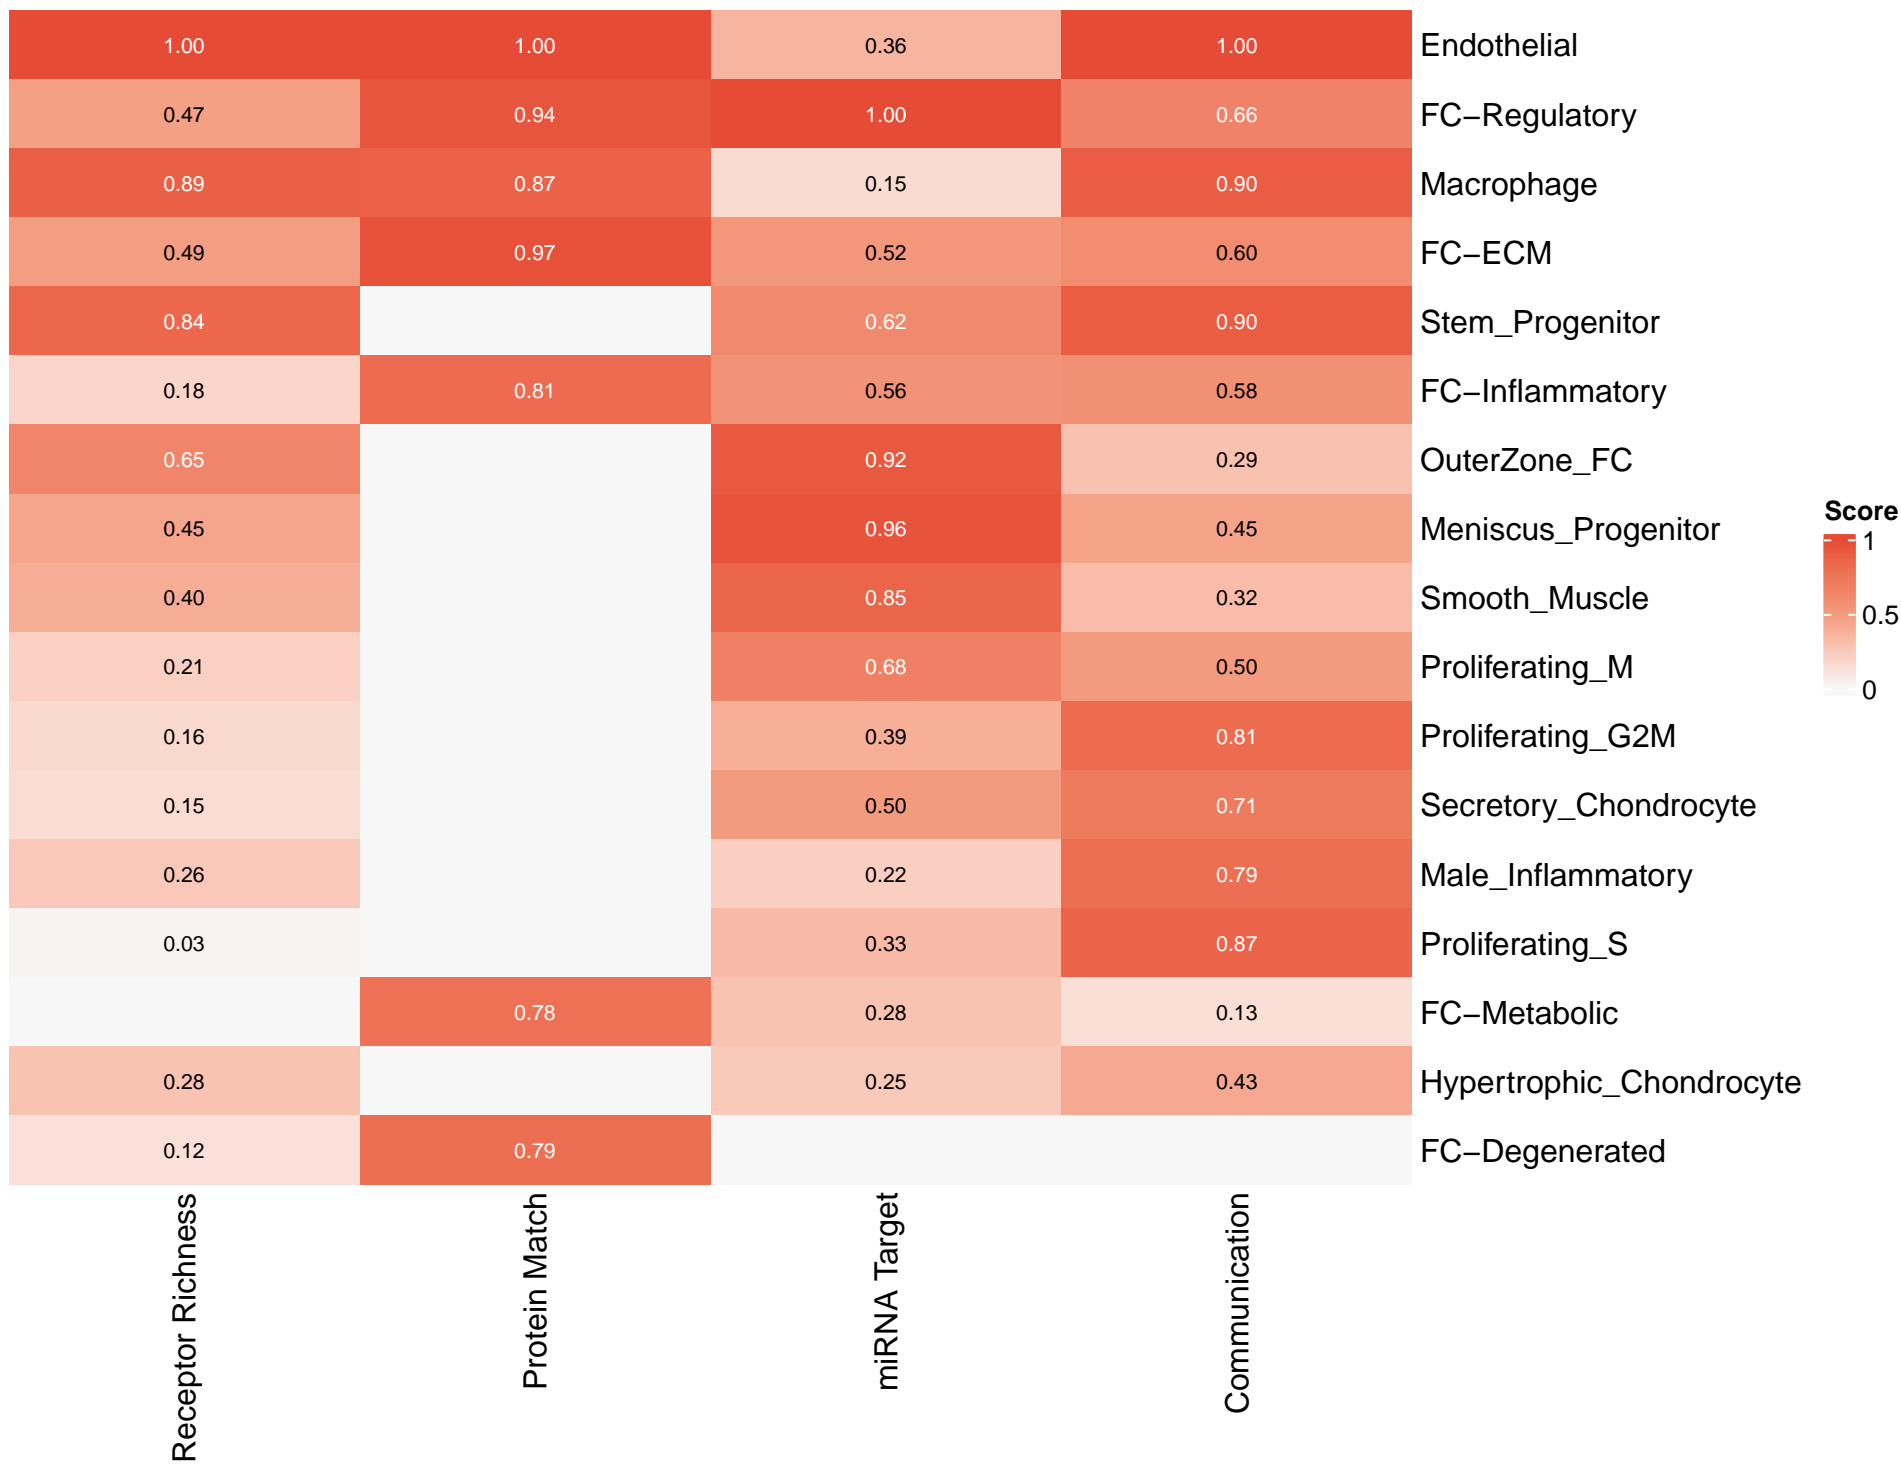

Supplement: Supplementary file 15 [file b87a515c9a29570e79e0ea52.pdf]

Cell Type Composition Along Pseudotime

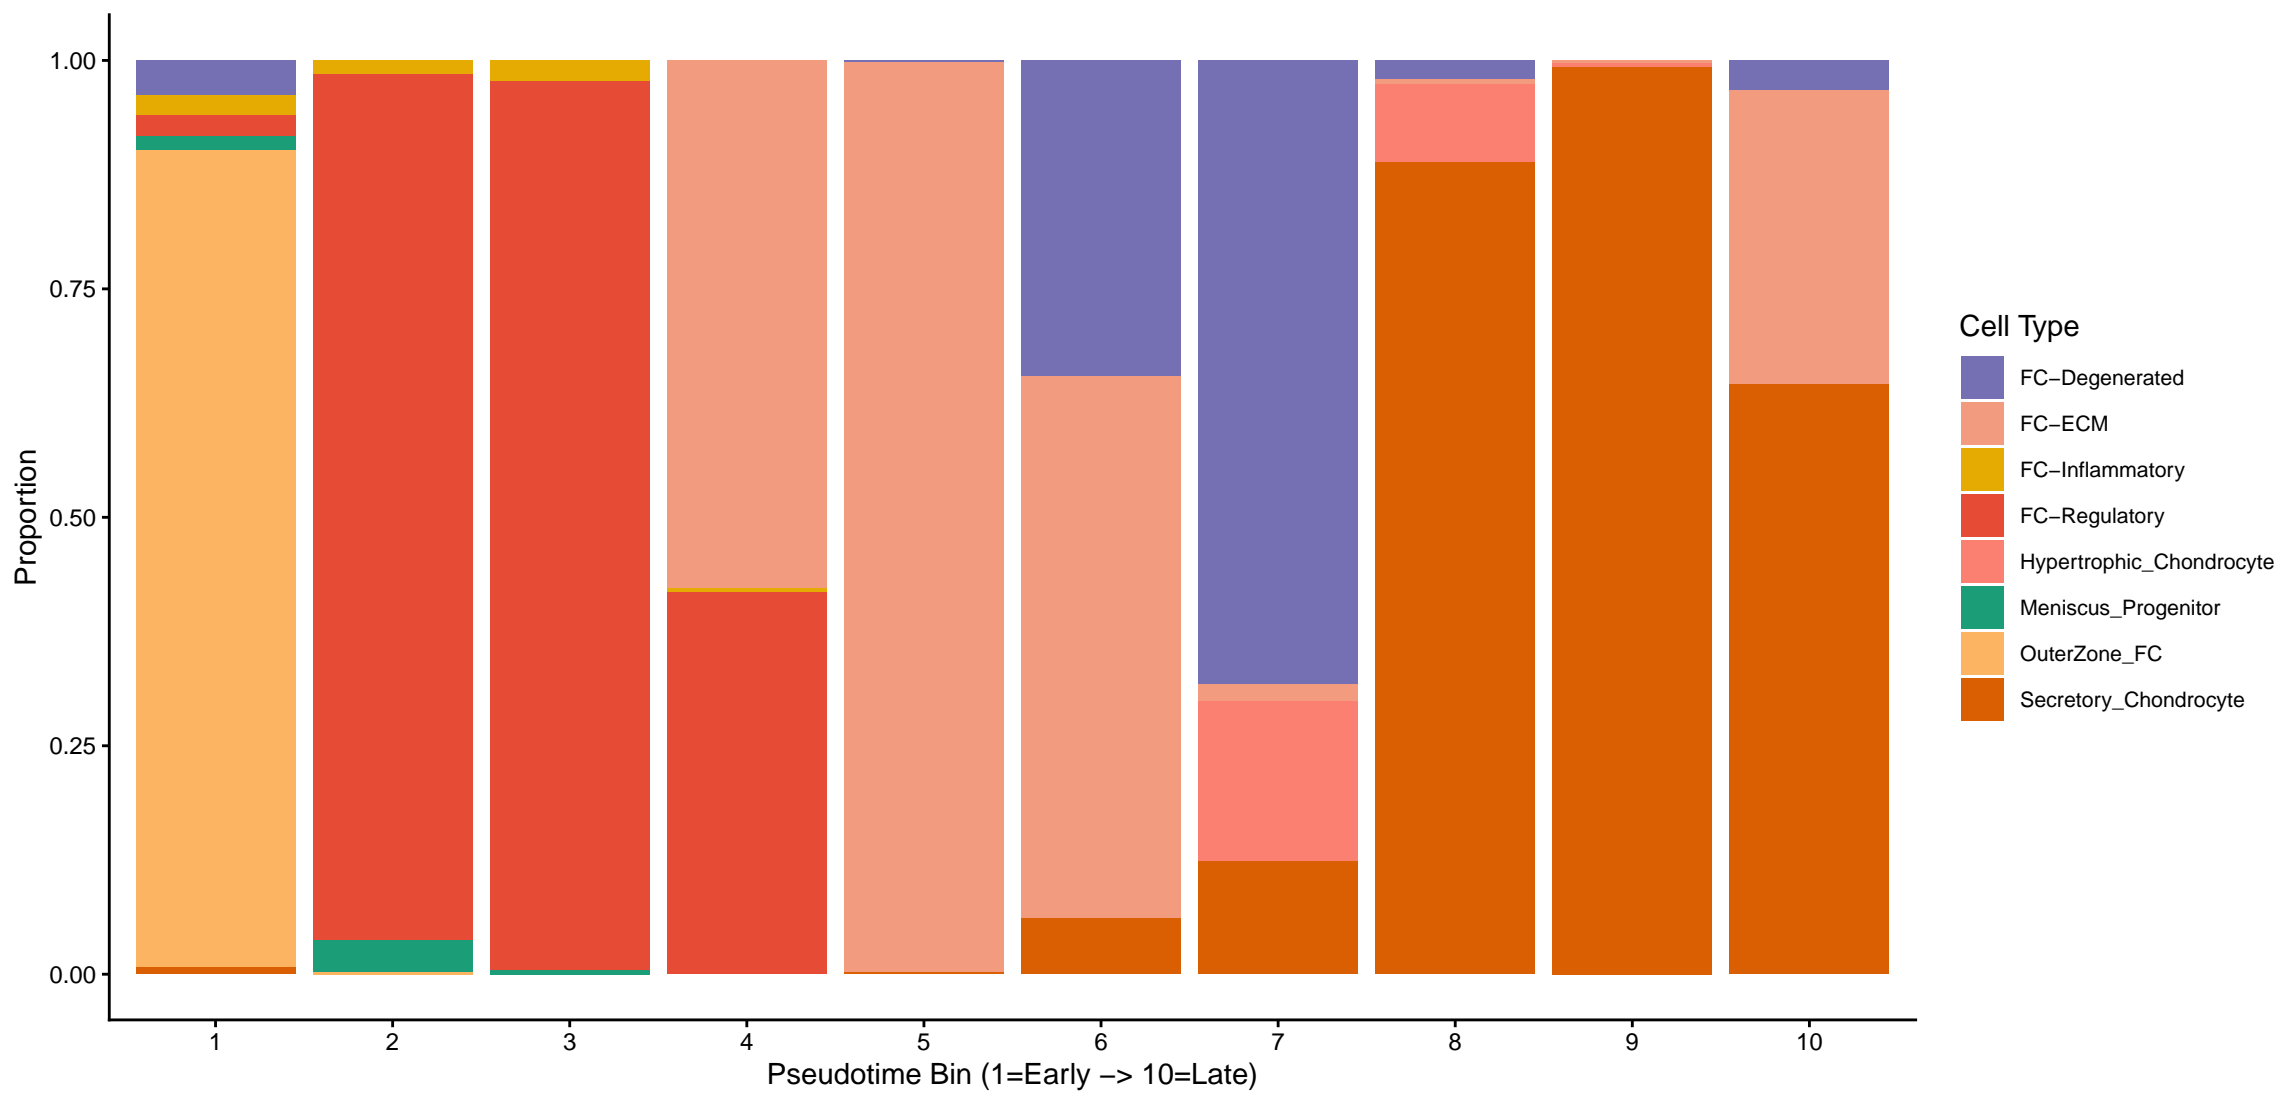

Supplement: Supplementary file 16 [file d14103c2d84380fec071028e.pdf]

# KEGG Pathway – MSC Exosome Cargo

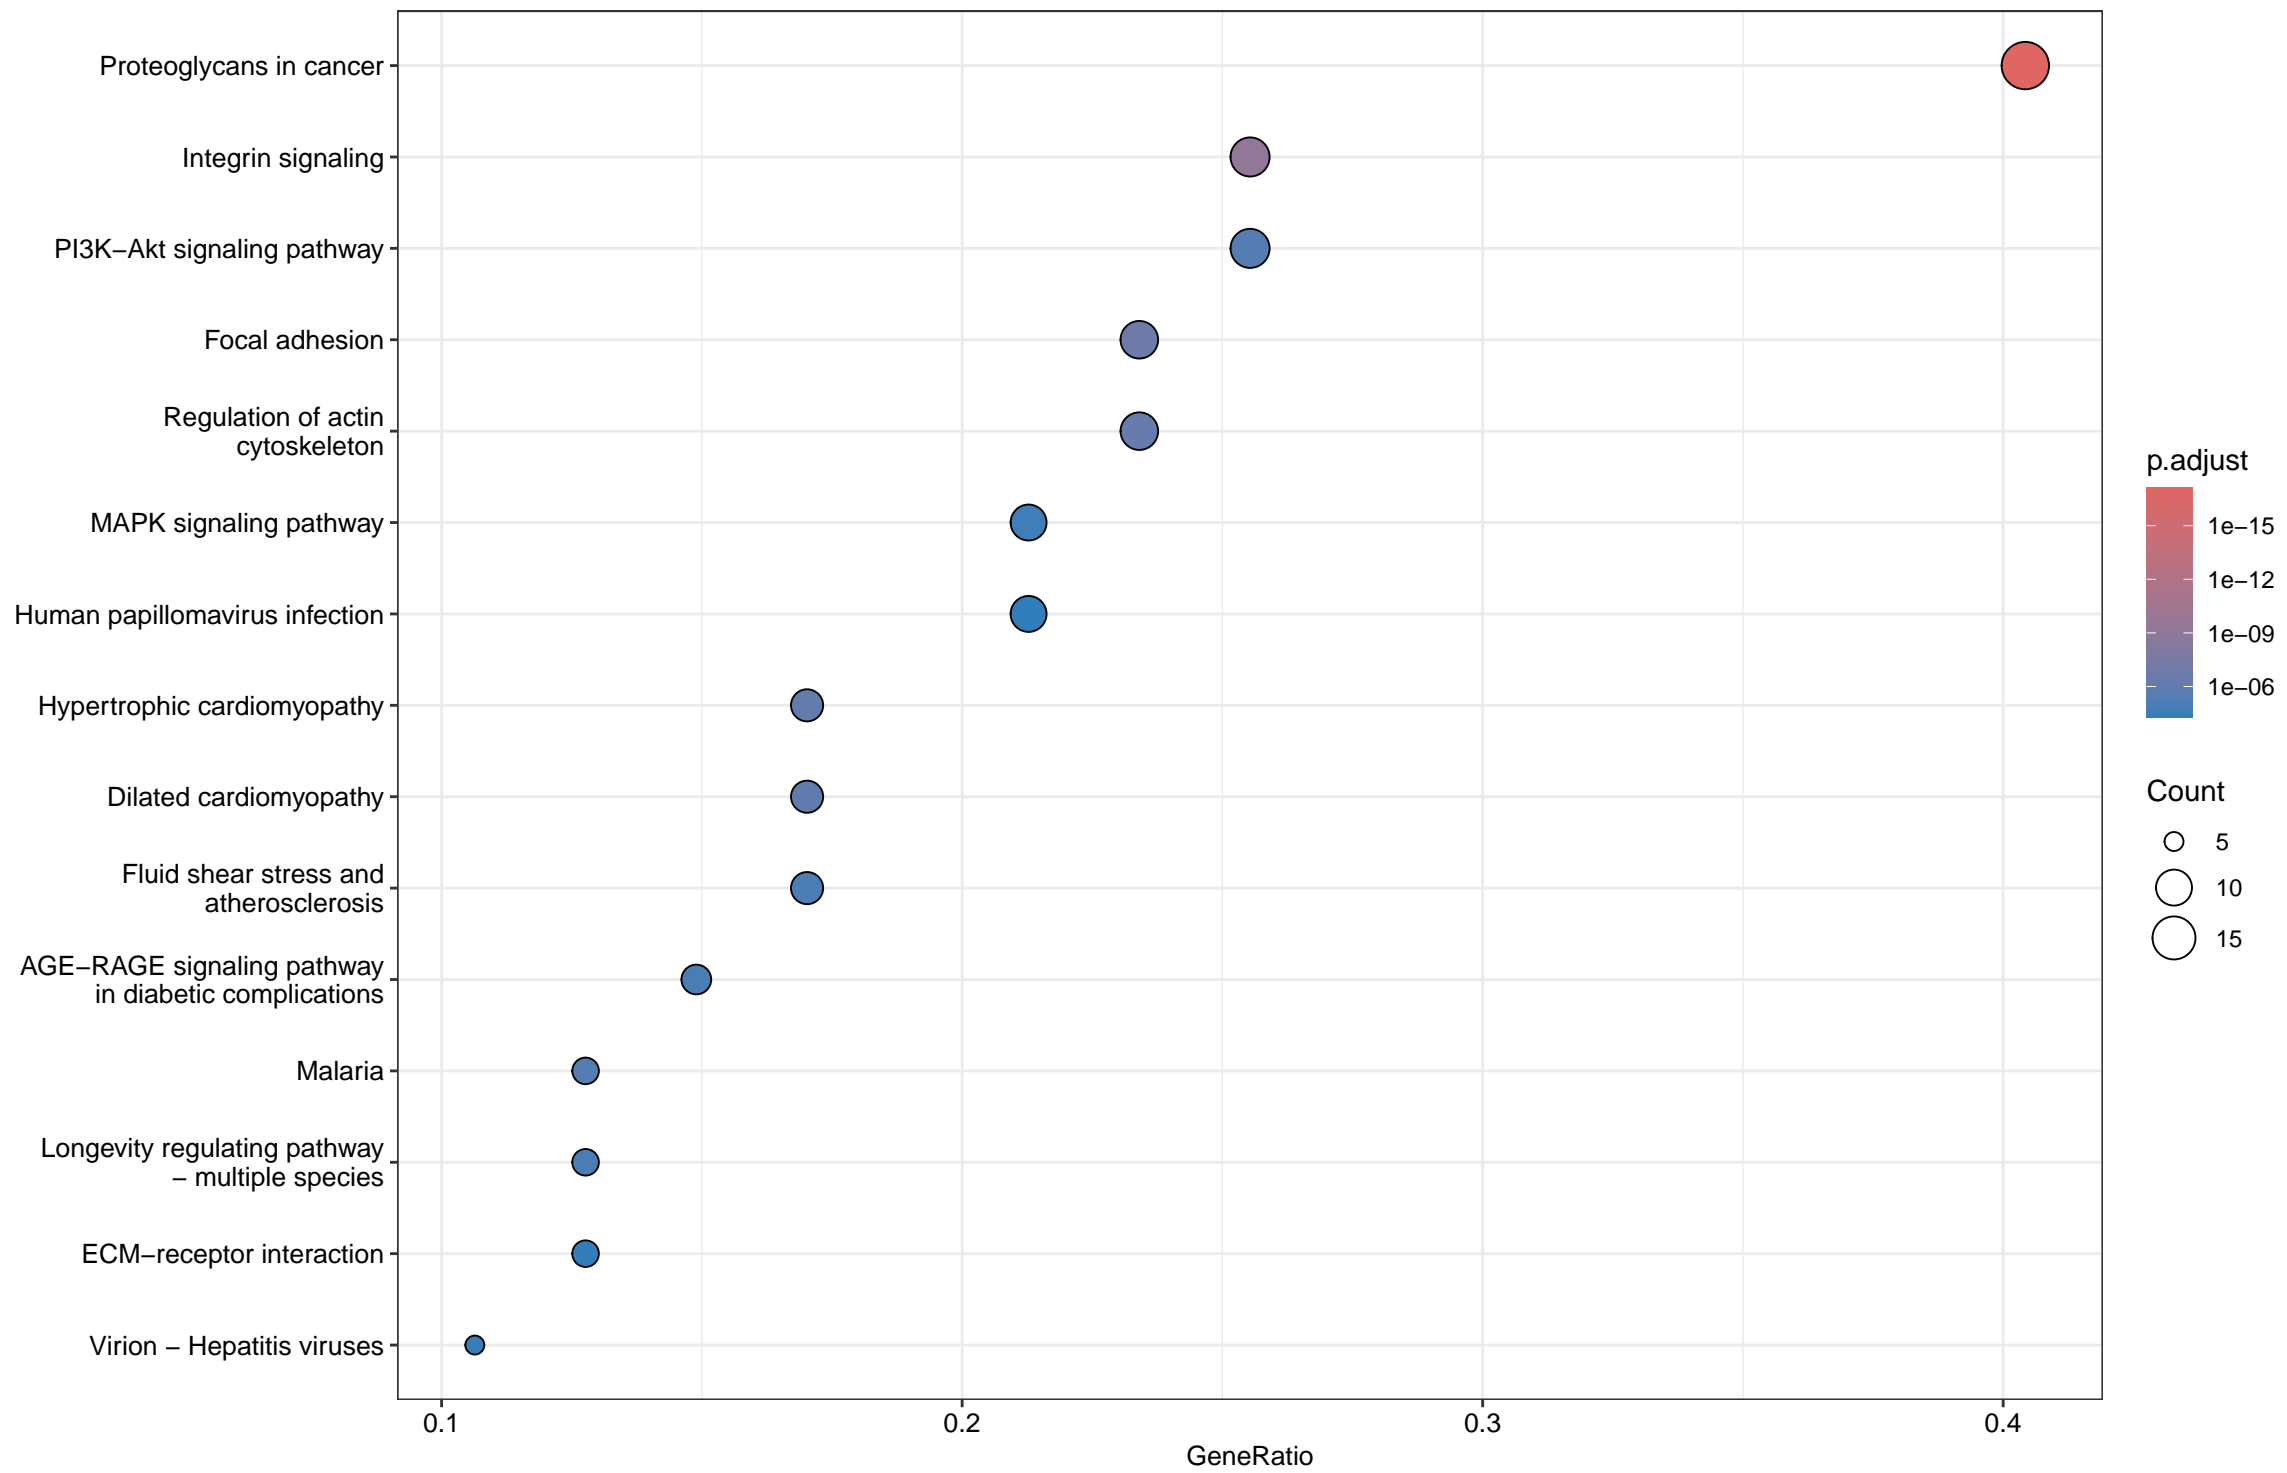

Supplement: Supplementary file 17 [file dd24b3b5e38b2c1acb448a0d.pdf]
